# Supplementary material for: New alkaline-earth amidosulfates and their unexpected decomposition to S4N4
Source: Royal Society of Chemistry journal article supplement (doi:10.1039/d2dt01380k), 2022-01-01
Supplement: d2dt01380k1.pdf [file d2dt01380k1.pdf]

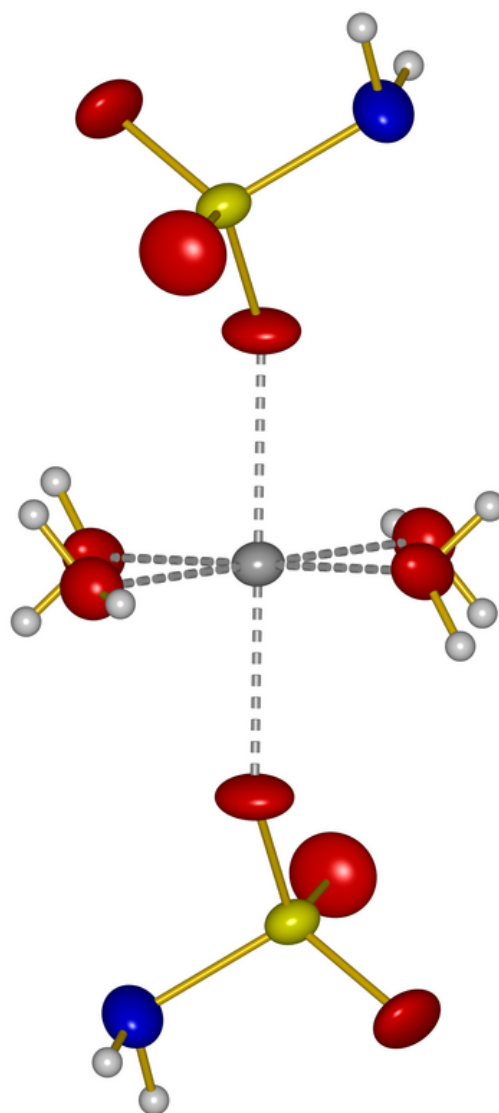

Figure S1: Coordination environment of Mg<sup>2+</sup> in Mg(NH<sub>2</sub>SO<sub>3</sub>)<sub>2</sub> · 4H<sub>2</sub>O (H atoms in white, N atoms in blue, O atoms in red, S atoms in yellow, Mg atom in grey, covalent bonds as yellow sticks and coordinate bonds as grey broken lines; displacement ellipsoids for all atoms but hydrogen correspond to 70% probability level).

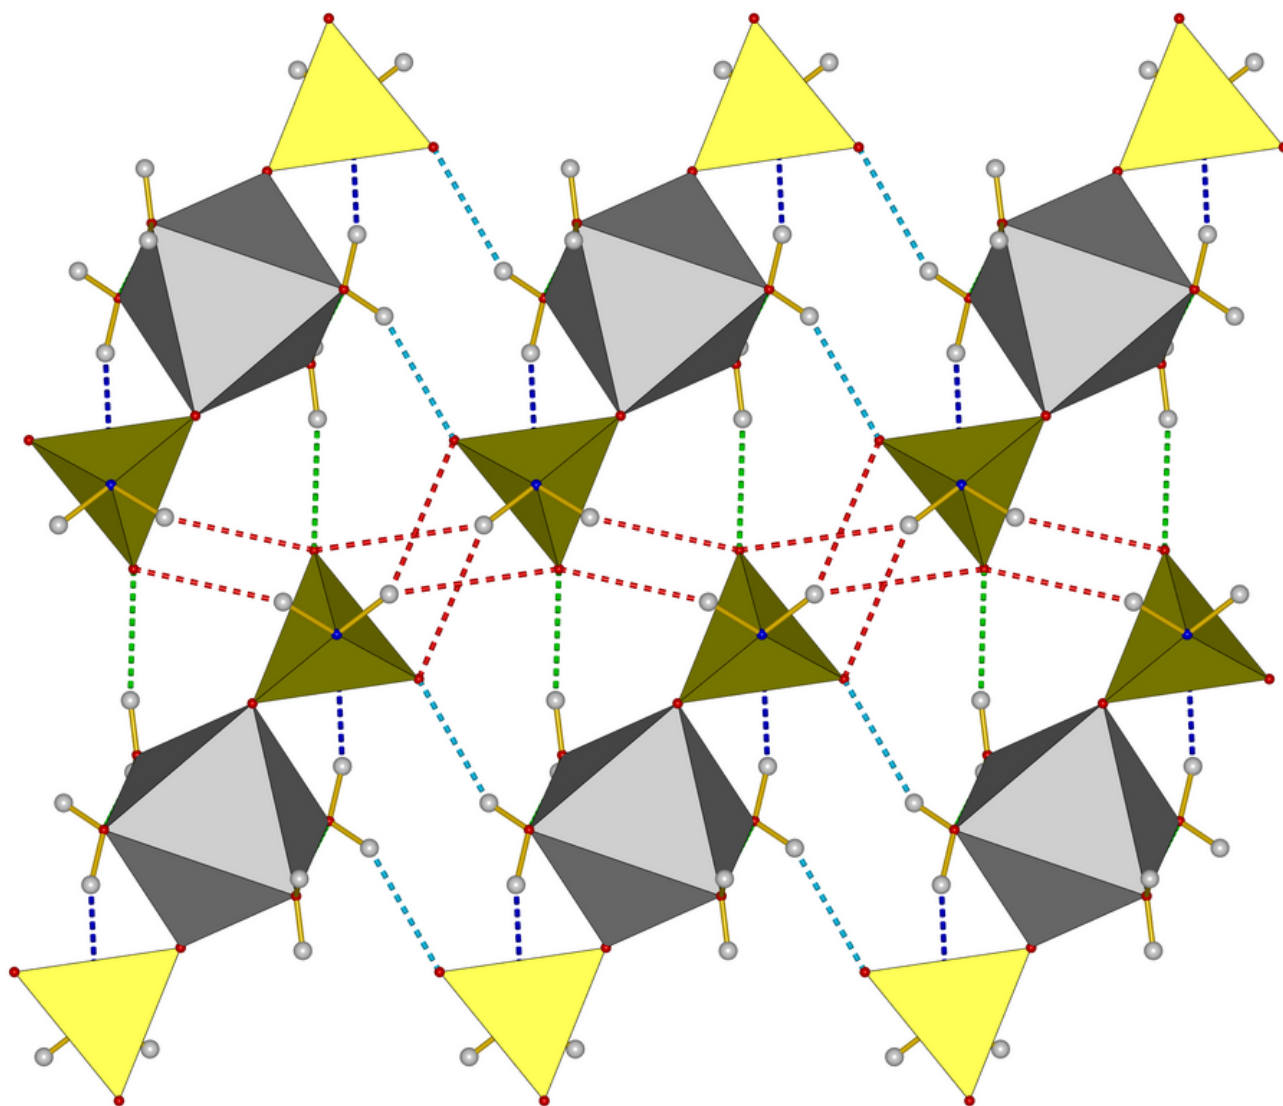

Figure S2: Hydrogen bonding pattern of  $\text{Mg}(\text{NH}_2\text{SO}_3)_2 \cdot 4\text{H}_2\text{O}$  viewed along  $[010]$  (H atoms in white, N atoms in blue, O atoms in red, MgO8 octahedra in grey,  $\text{SO}_3\text{N}$  tetrahedra in yellow). Hydrogen bonds are displayed as broken lines with colour coding as follows:  $\text{N-H} \cdots \text{O}_{\text{as}}$  in red,  $\text{O-H} \cdots \text{O}_{\text{as}}$  in violet,  $\text{O-H} \cdots \text{O}_{\text{w}}$  in light green,  $\text{O-H} \cdots \text{N}$  in dark blue.

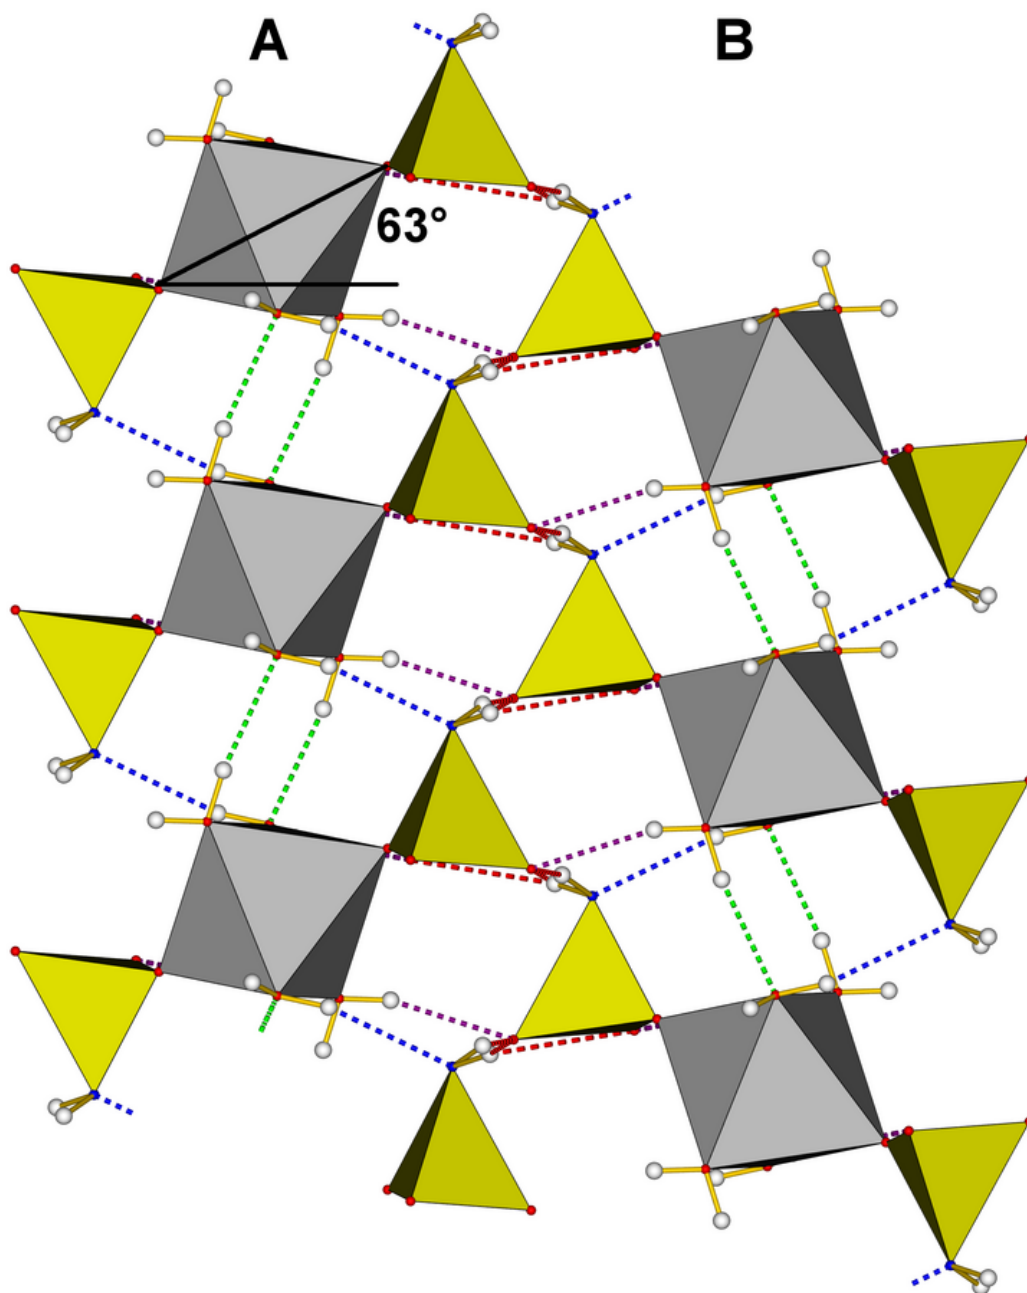

Figure S3: Hydrogen bonding pattern of  $\text{Mg}(\text{NH}_2\text{SO}_3)_2 \cdot 4\text{H}_2\text{O}$  viewed along  $[100]$  (H atoms in white, N atoms in blue, O atoms in red, MgO8 octahedra in grey,  $\text{SO}_3\text{N}$  tetrahedra in yellow). Hydrogen bonds are displayed as broken lines with colour coding as follows:  $\text{N-H} \cdots \text{O}_{\text{as}}$  in red,  $\text{O-H} \cdots \text{O}_{\text{as}}$  in violet,  $\text{O-H} \cdots \text{O}_{\text{w}}$  in light green,  $\text{O-H} \cdots \text{N}$  in dark blue.

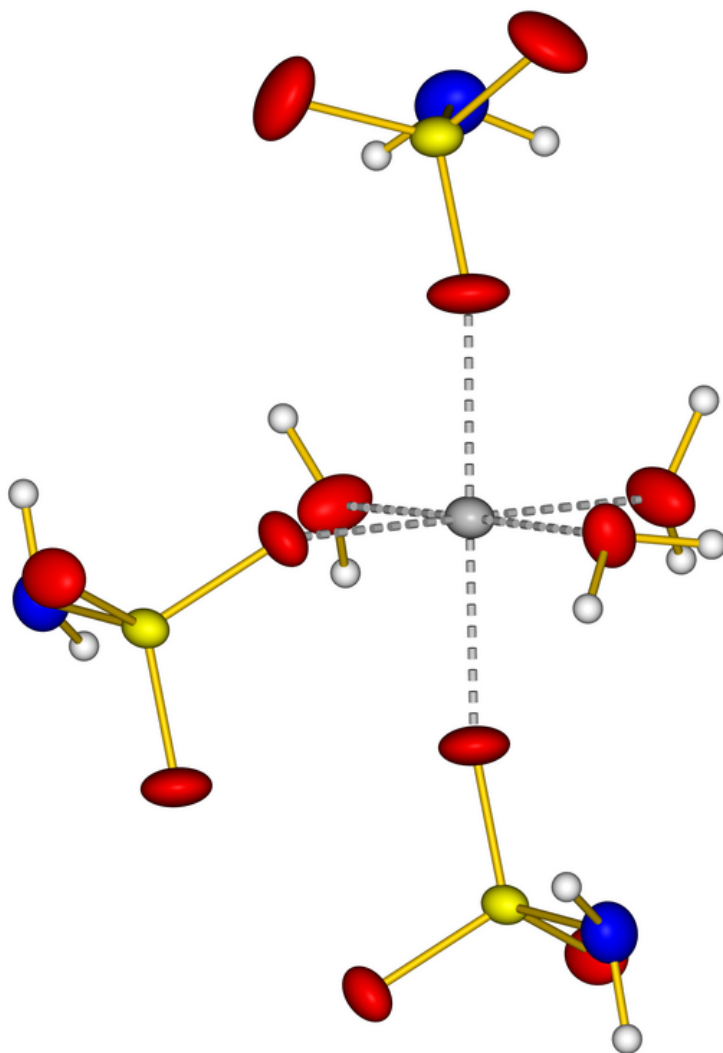

Figure S4: Coordination environment of  $\text{Mg}^{2+}$  in  $\text{Mg}(\text{NH}_2\text{SO}_3)_2 \cdot 3\text{H}_2\text{O}$  (H atoms in white, N atoms in blue, O atoms in red, S atoms in yellow, Mg atom in grey, covalent bonds as yellow sticks and coordinate bonds as grey broken lines; displacement ellipsoids for all atoms but hydrogen correspond to 70% probability level).



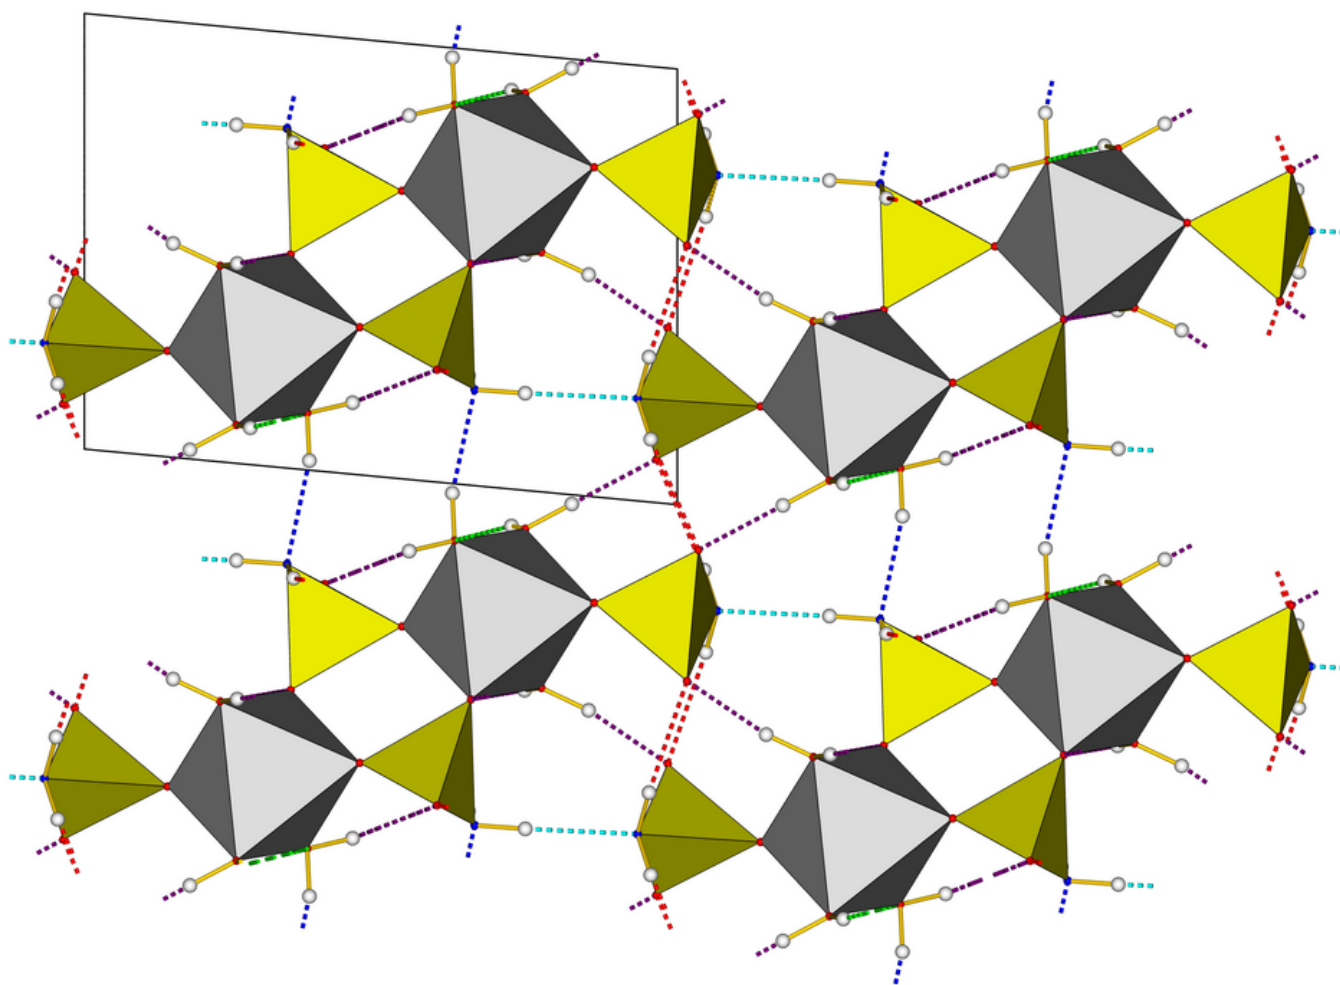

Figure S5: Hydrogen bonding pattern of  $\text{Mg}(\text{NH}_2\text{SO}_3)_2 \cdot 4\text{H}_2\text{O}$  viewed along  $[100]$  (H atoms in white, N atoms in blue, O atoms in red, MgO8 octahedra in grey,  $\text{SO}_3\text{N}$  tetrahedra in yellow). Hydrogen bonds are displayed as broken lines with colour coding as follows:  $\text{N-H} \cdots \text{O}_{\text{as}}$  in red,  $\text{N-H} \cdots \text{N}$  in light blue,  $\text{O-H} \cdots \text{O}_{\text{as}}$  in violett,  $\text{O-H} \cdots \text{O}_{\text{w}}$  in light green,  $\text{O-H} \cdots \text{N}$  in dark blue.

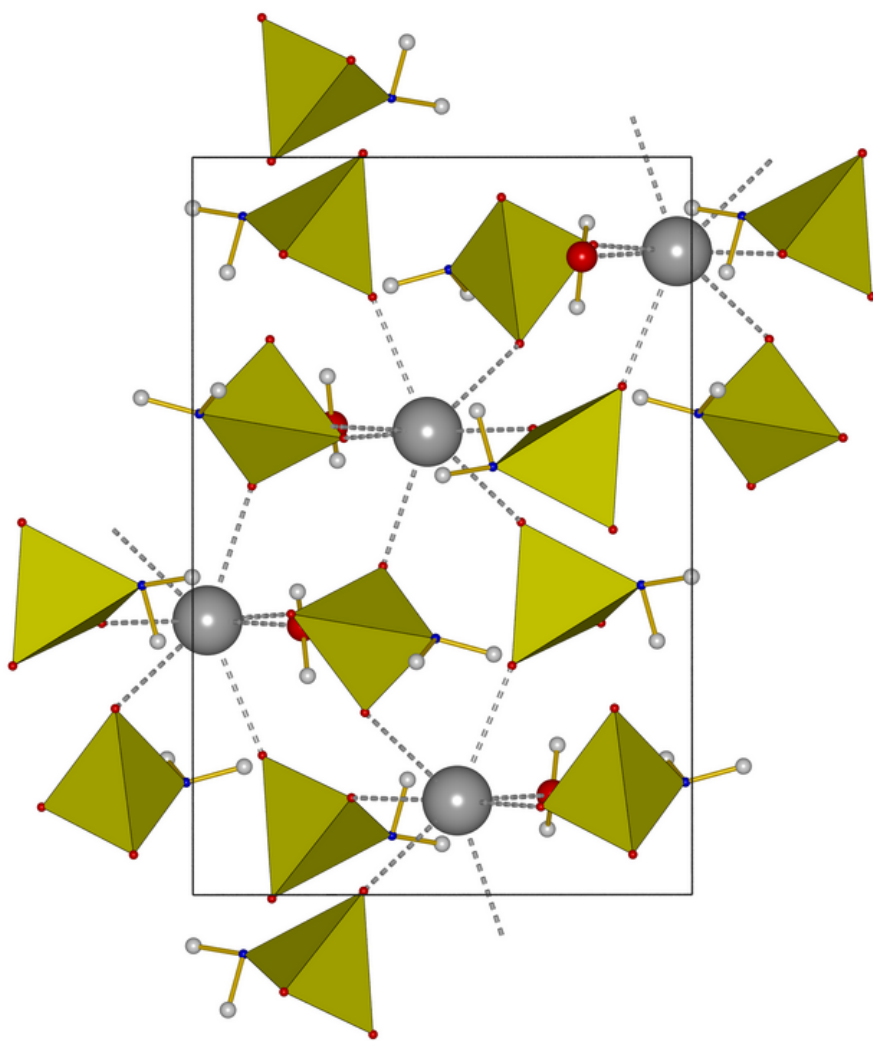

Figure S6: The unit cell of  $\text{Ca}(\text{NH}_2\text{SO}_3)_2 \cdot \text{H}_2\text{O}$  viewed along  $[100]$  (H atoms in white, N atoms in blue, O atoms in red,  $\text{SO}_3\text{N}$  tetrahedra in yellow, Ca atoms in grey, covalent bonds as yellow sticks and coordinate bonds as grey broken lines).

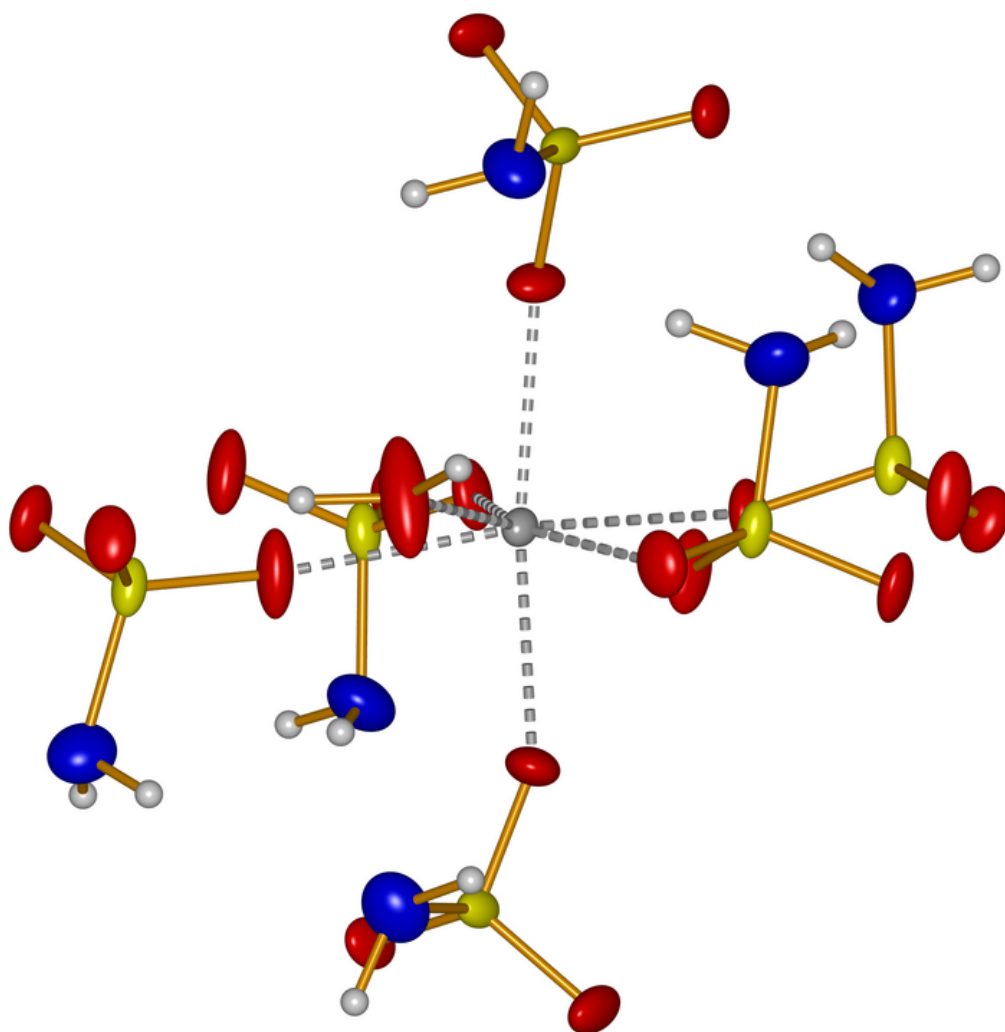

Figure S7: Coordination environment of  $\text{Ca}^{2+}$  in  $\text{Ca}(\text{NH}_2\text{SO}_3)_2 \cdot \text{H}_2\text{O}$  (H atoms in white, N atoms in blue, O atoms in red, S atoms in yellow, Ca atom in grey, covalent bonds as yellow sticks and coordinate bonds as grey broken lines; displacement ellipsoids for all atoms but hydrogen correspond to 70% probability level).

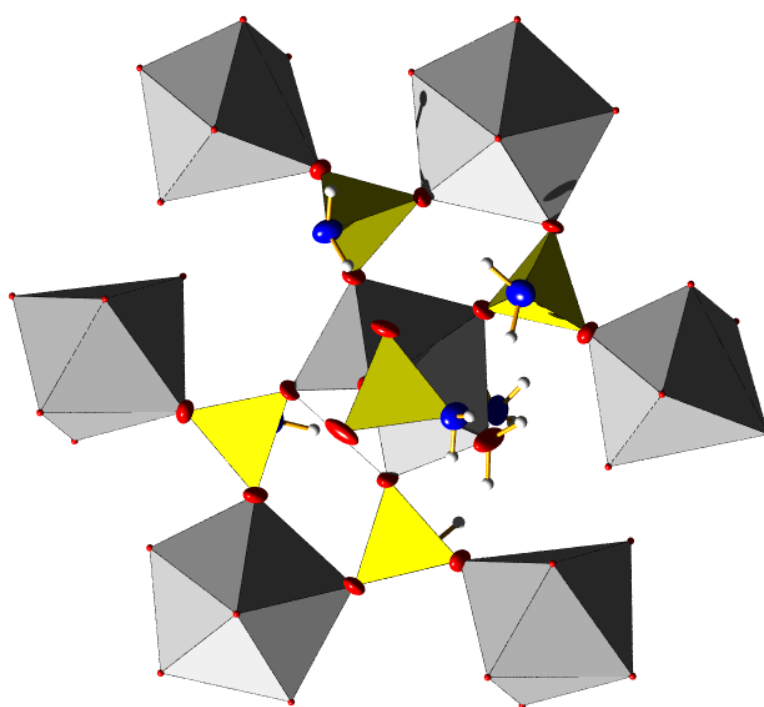

Figure S8: Hexagonal packing of  $\text{CaO}_9$  pentagonal bipyramids (shown in grey) bridged via  $\text{SO}_3\text{N}$  tetrahedra (shown in yellow).

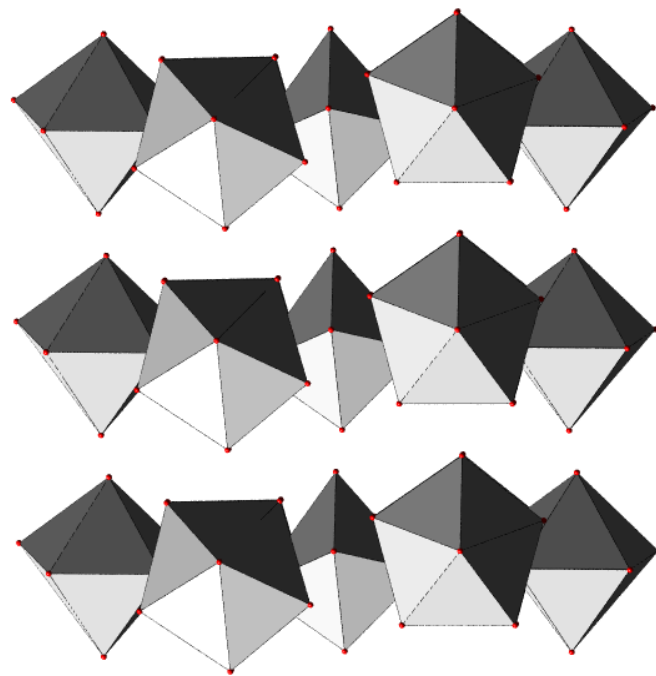

Figure S9: AA layered dense packing of  $\text{CaO}_7$  bipyramids (shown in grey).

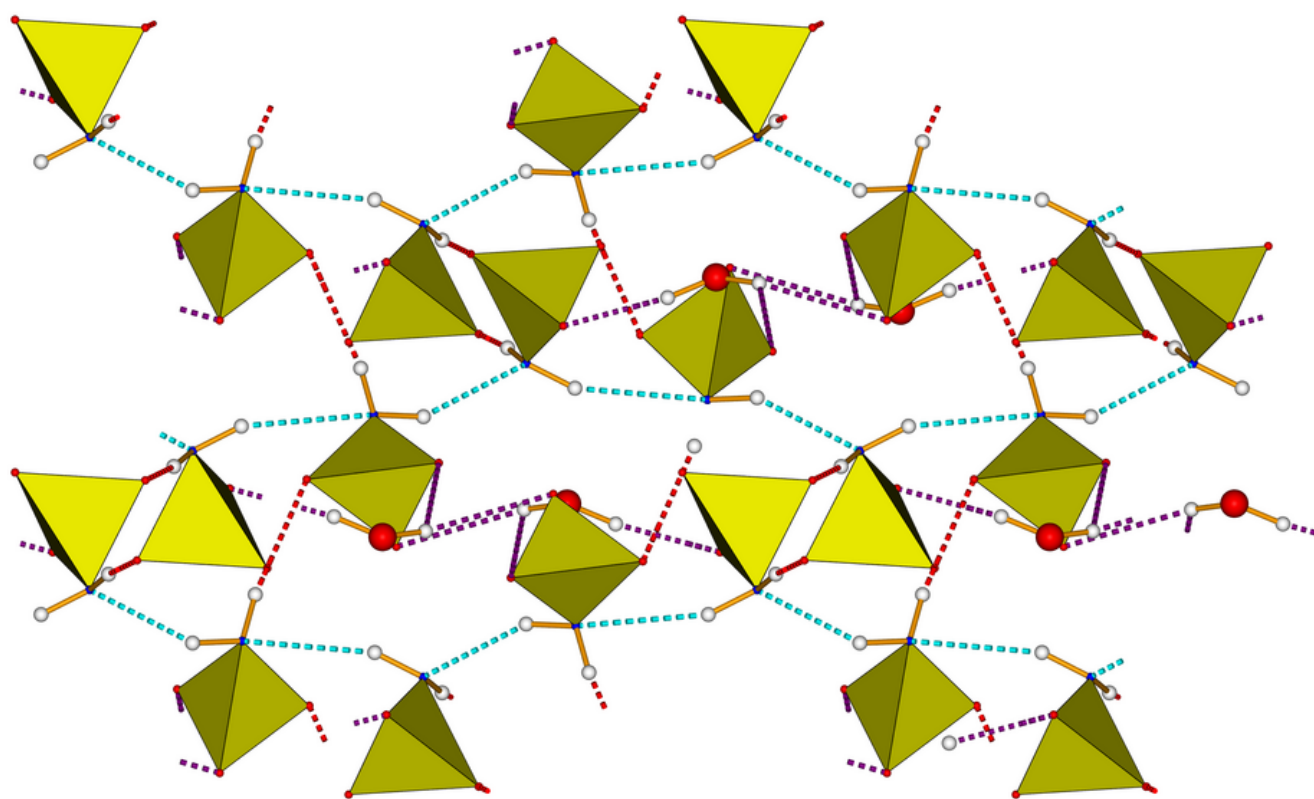

Figure S10: Hydrogen bonding pattern of  $\text{Ca}(\text{NH}_2\text{SO}_3)_2 \cdot \text{H}_2\text{O}$  viewed along  $[100]$  (H atoms in white, N atoms in blue, O atoms in red,  $\text{SO}_3\text{N}$  tetrahedra in yellow). Hydrogen bonds are displayed as broken lines with colour coding as follows:  $\text{N-H} \cdots \text{O}_{\text{as}}$  in red,  $\text{N-H} \cdots \text{N}$  in light blue,  $\text{O-H} \cdots \text{O}_{\text{as}}$  in violet.

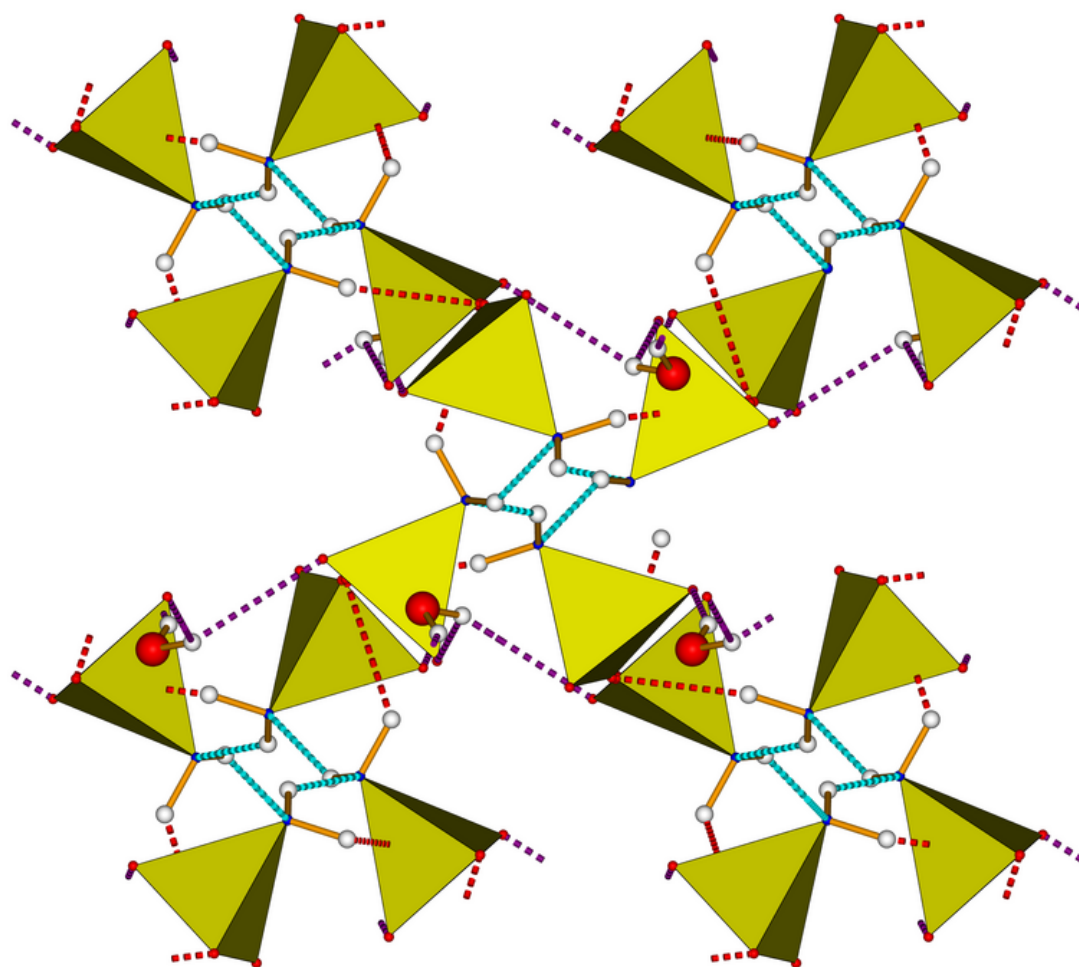

Figure S11: Hydrogen bonding pattern of  $\text{Ca}(\text{NH}_2\text{SO}_3)_2 \cdot \text{H}_2\text{O}$  viewed along  $[001]$  (H atoms in white, N atoms in blue, O atoms in red,  $\text{SO}_3\text{N}$  tetrahedra in yellow). Hydrogen bonds are displayed as broken lines with colour coding as follows:  $\text{N-H} \cdots \text{O}_{\text{as}}$  in red,  $\text{N-H} \cdots \text{N}$  in light blue,  $\text{O-H} \cdots \text{O}_{\text{as}}$  in violett.

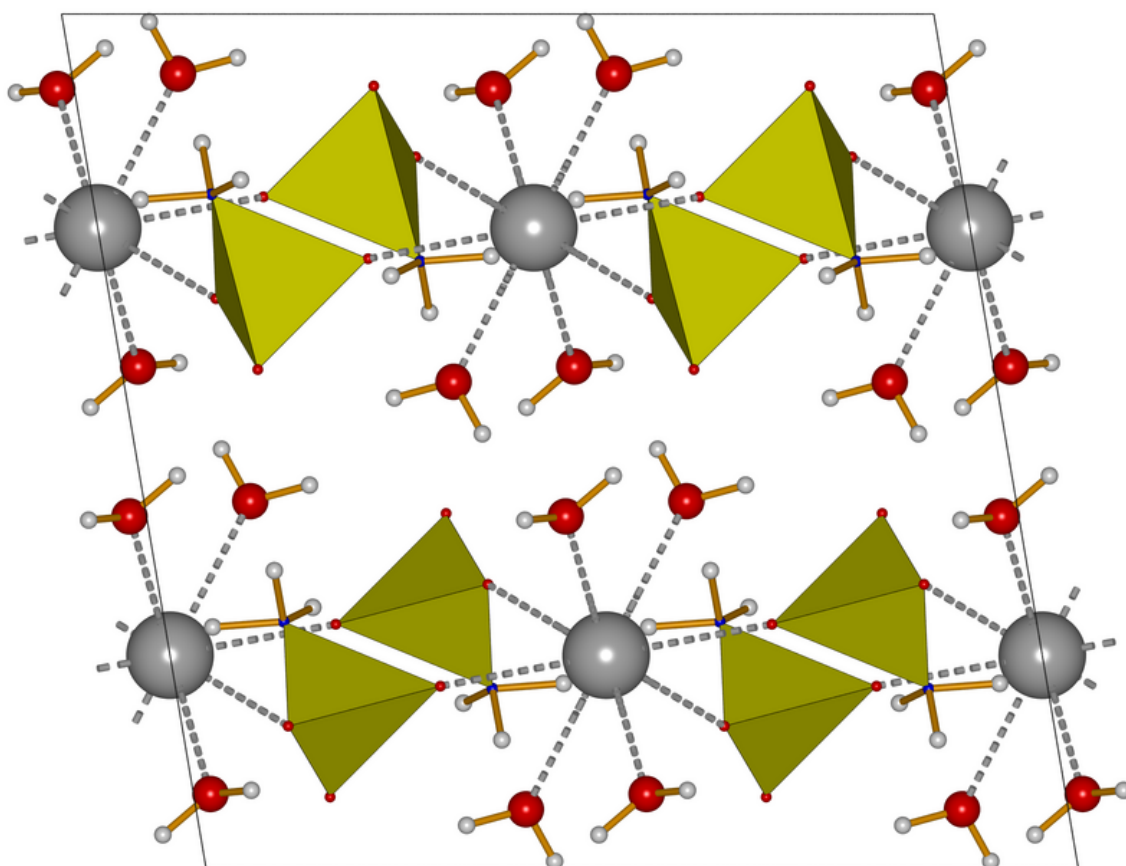

Figure S12: The unit cell of  $\text{Sr}(\text{NH}_2\text{SO}_3)_2 \cdot 4\text{H}_2\text{O}$  viewed along  $[0\ 1\ 0]$  (H atoms in white, N atoms in blue, O atoms in red,  $\text{SO}_3\text{N}$  tetrahedra in yellow, Sr atoms in grey, covalent bonds as yellow sticks and coordinate bonds as grey broken lines).



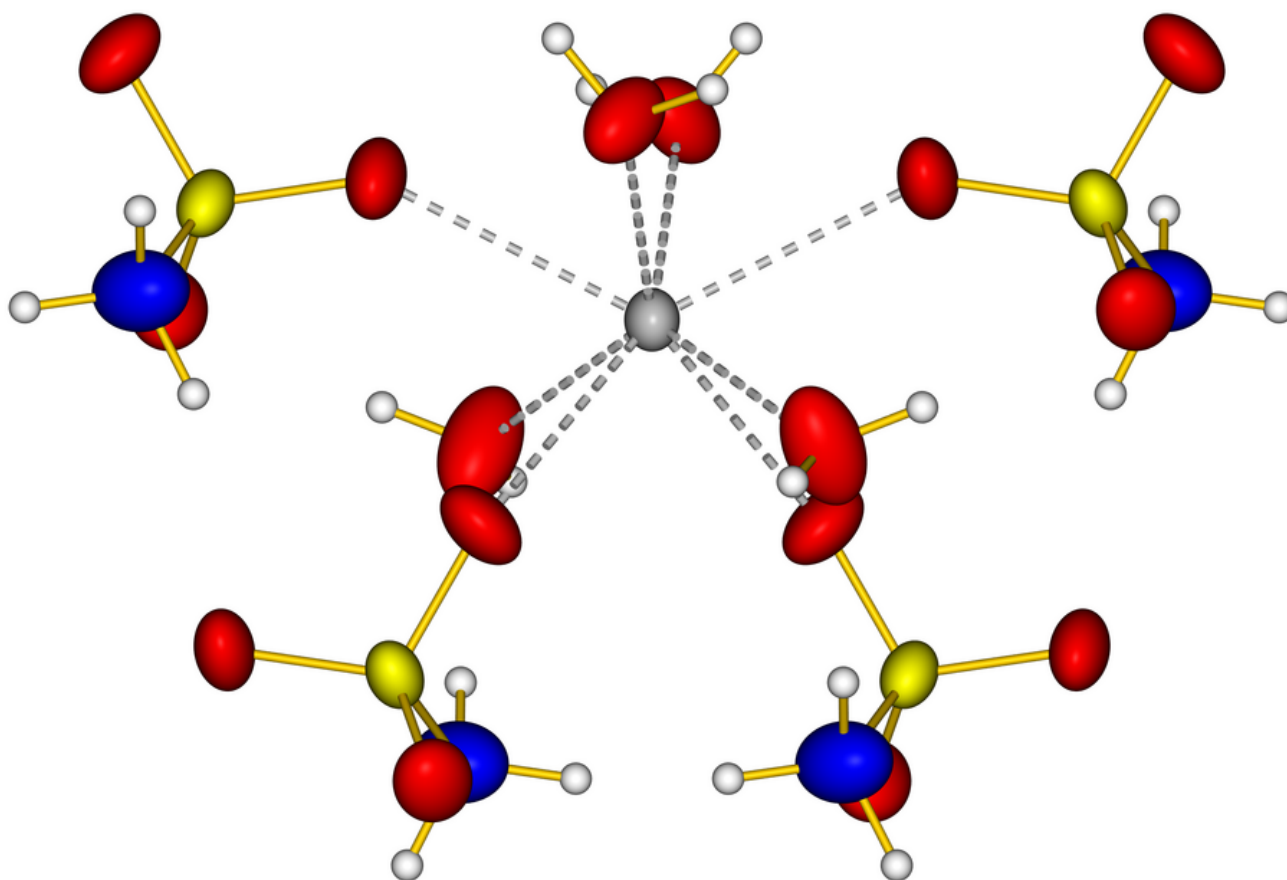

Figure S13: Coordination environment of  $\text{Sr}^{2+}$  in  $\text{Sr}(\text{NH}_2\text{SO}_3)_2 \cdot 4\text{H}_2\text{O}$  (H atoms in white, N atoms in blue, O atoms in red, S atoms in yellow, Sr atom in grey, covalent bonds as yellow sticks and coordinate bonds as grey broken lines; displacement ellipsoids for all atoms but hydrogen correspond to 70% probability level)

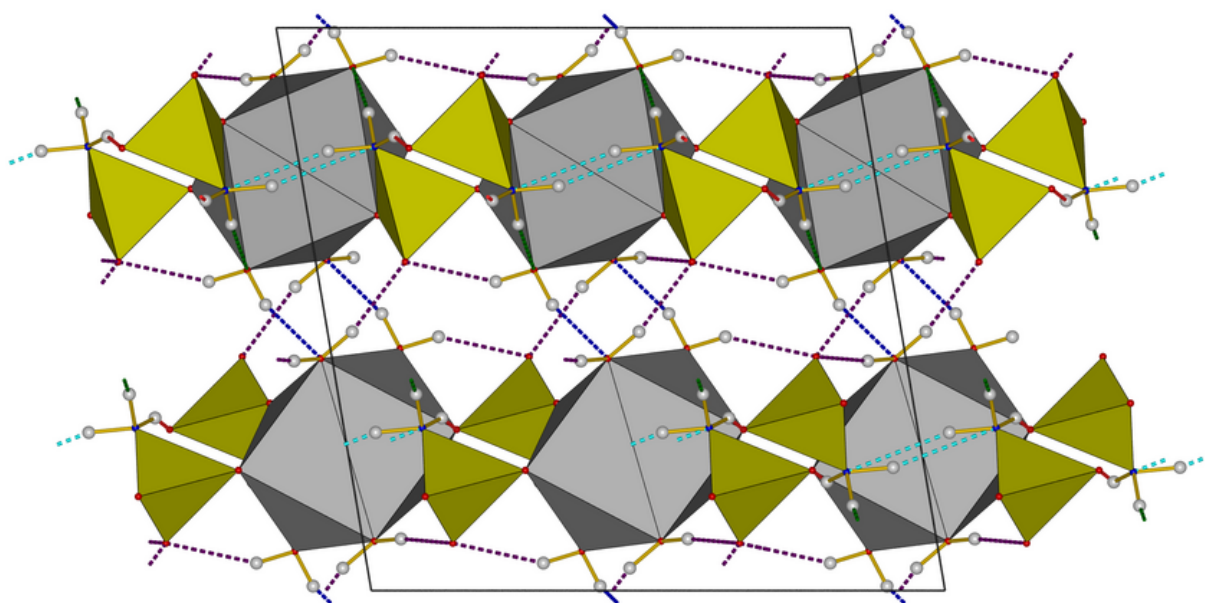

Figure S14: Hydrogen bonding pattern of  $\text{Sr}(\text{NH}_2\text{SO}_3)_2 \cdot 4\text{H}_2\text{O}$  viewed along  $[0\ 1\ 0]$  (H atoms in white, N atoms in blue, O atoms in red,  $\text{SO}_3\text{N}$  tetrahedra in yellow and  $\text{SrO}_8$  antiprisms in grey). Hydrogen bonds are displayed as broken lines with colour coding as follows:  $\text{N-H}\cdots\text{O}_{\text{as}}$  in red,  $\text{N-H}\cdots\text{O}_{\text{w}}$  in dark green,  $\text{N-H}\cdots\text{N}$  in light blue,  $\text{O-H}\cdots\text{O}_{\text{as}}$  in violet,  $\text{O-H}\cdots\text{N}$  in dark blue.

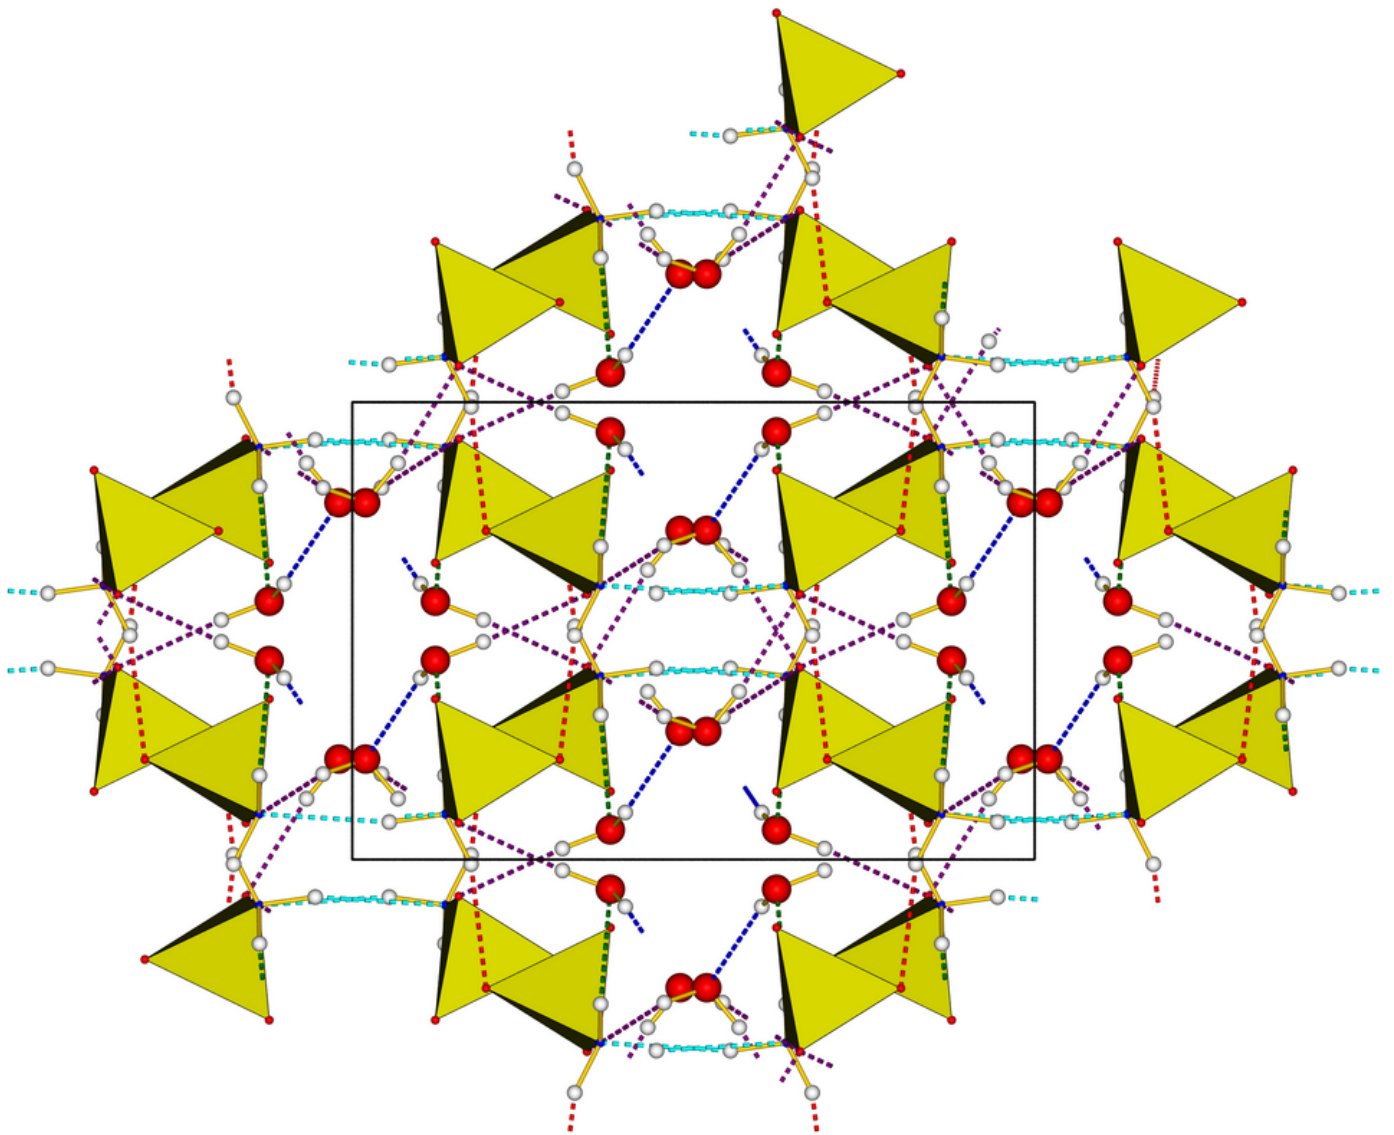

Figure S15: Hydrogen bonding pattern of  $\text{Sr}(\text{NH}_2\text{SO}_3)_2 \cdot 4\text{H}_2\text{O}$  viewed along  $[001]$  (H atoms in white, N atoms in blue, O atoms in red,  $\text{SO}_3\text{N}$  tetrahedra in yellow). Hydrogen bonds are displayed as broken lines with colour coding as follows:  $\text{N-H} \cdots \text{O}_{\text{as}}$  in red,  $\text{N-H} \cdots \text{O}_{\text{w}}$  in dark green,  $\text{N-H} \cdots \text{N}$  in light blue,  $\text{O-H} \cdots \text{O}_{\text{as}}$  in violett,  $\text{O-H} \cdots \text{N}$  in dark blue.

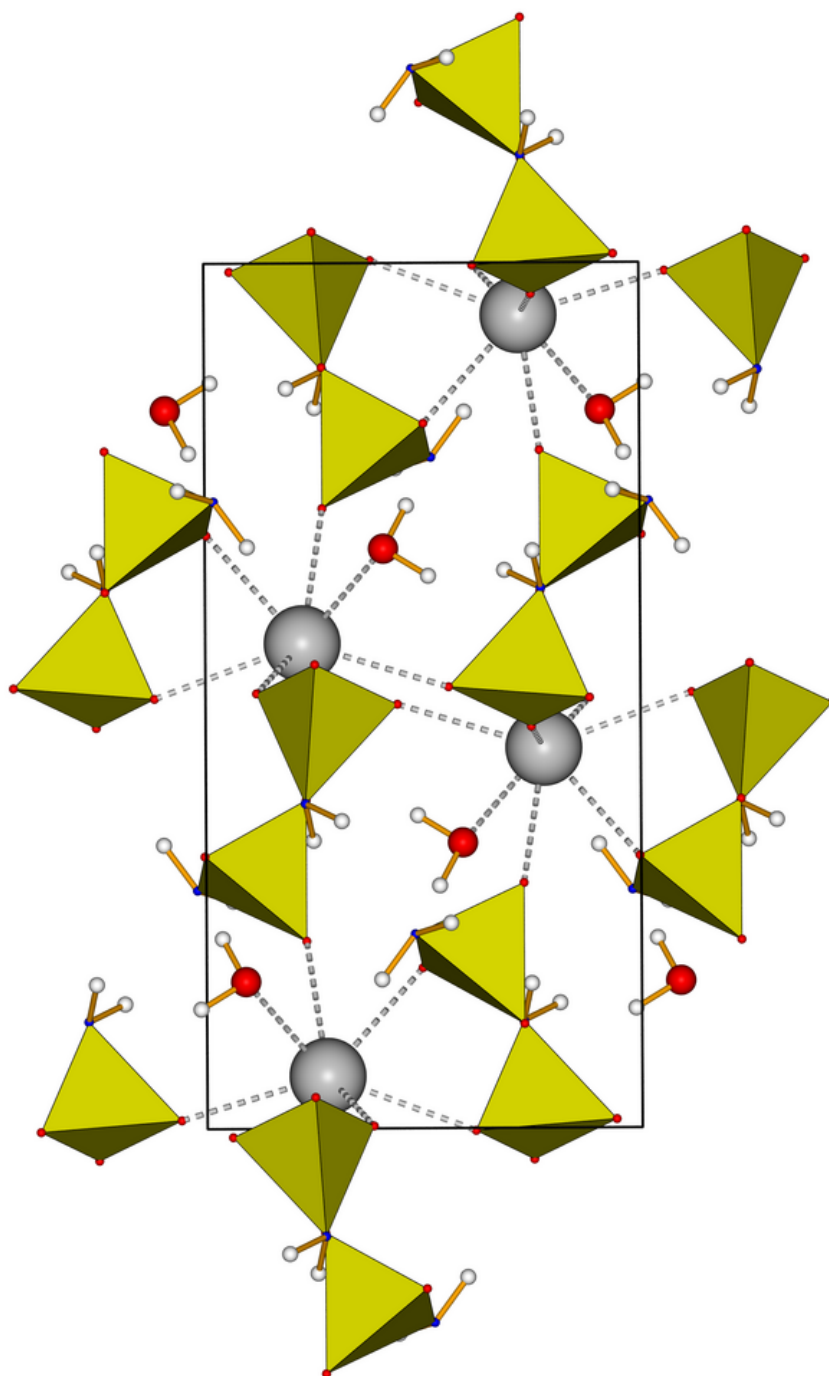

Figure S16: The unit cell of  $\text{Sr}(\text{NH}_2\text{SO}_3)_2 \cdot \text{H}_2\text{O}$  viewed along  $[010]$  (H atoms in white, N atoms in blue, O atoms in red,  $\text{SO}_3\text{N}$  tetrahedra in yellow, Sr atoms in grey, covalent bonds as yellow sticks and coordinate bonds as grey broken lines).

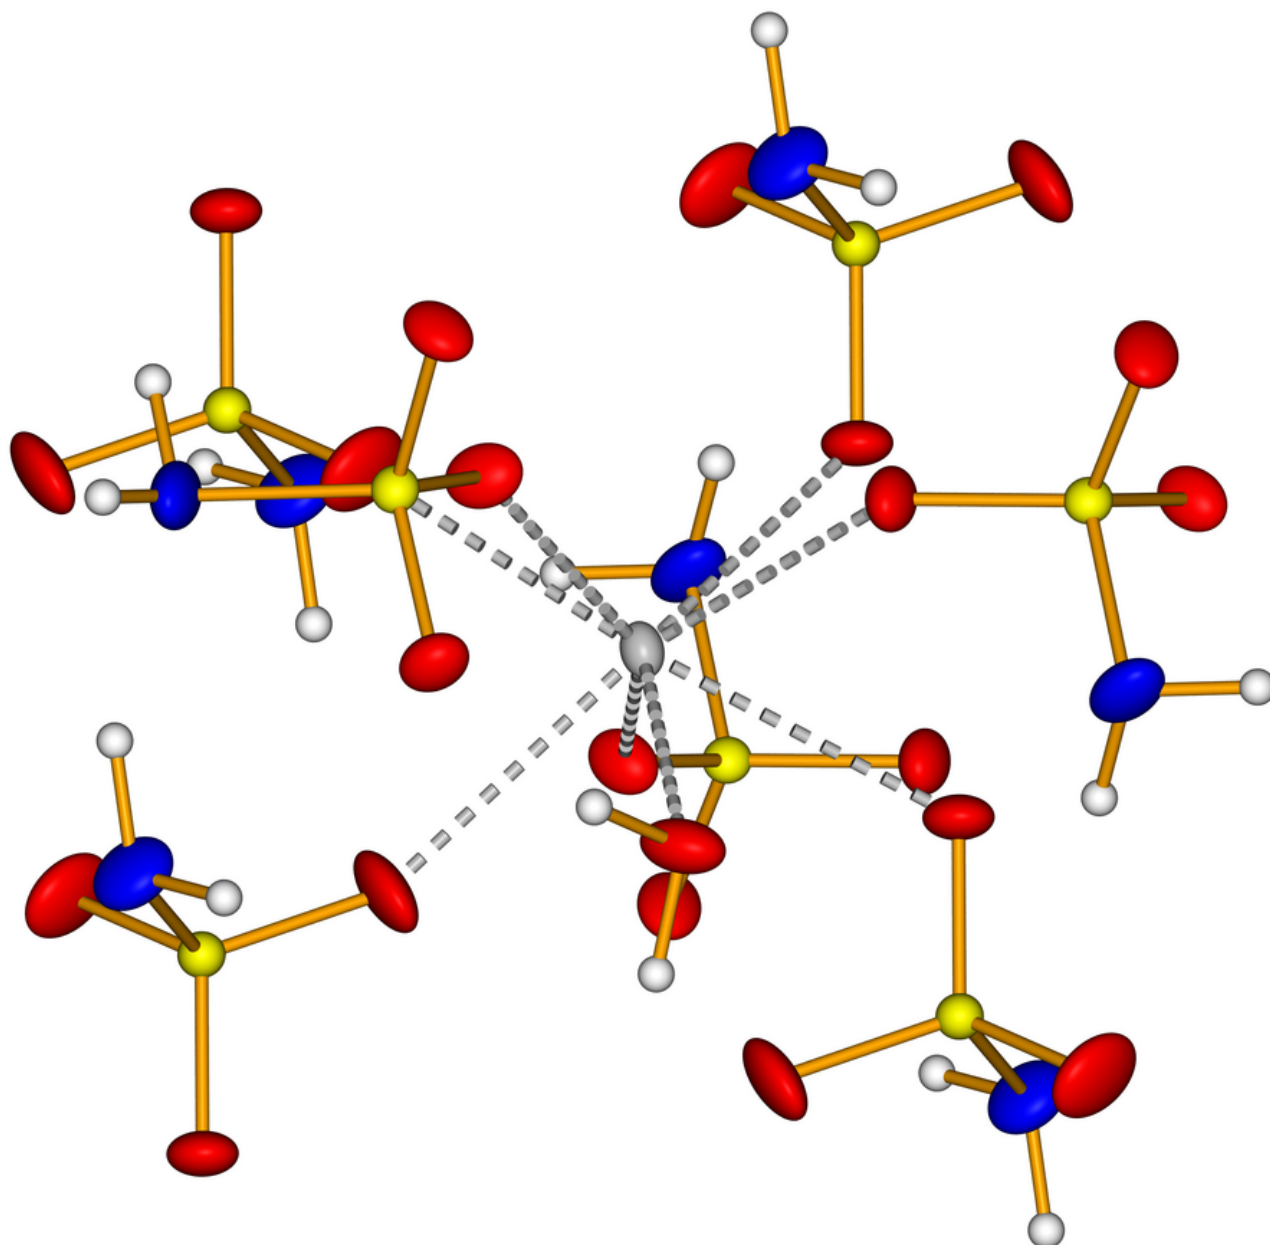

Figure S17: Coordination environment of  $\text{Sr}^{2+}$  in  $\text{Sr}(\text{NH}_2\text{SO}_3)_2 \cdot \text{H}_2\text{O}$  (H atoms in white, N atoms in blue, O atoms in red, S atoms in yellow, Sr atom in grey, covalent bonds as yellow sticks and coordinate bonds as grey broken lines; displacement ellipsoids for all atoms but hydrogen correspond to 70% probability level)

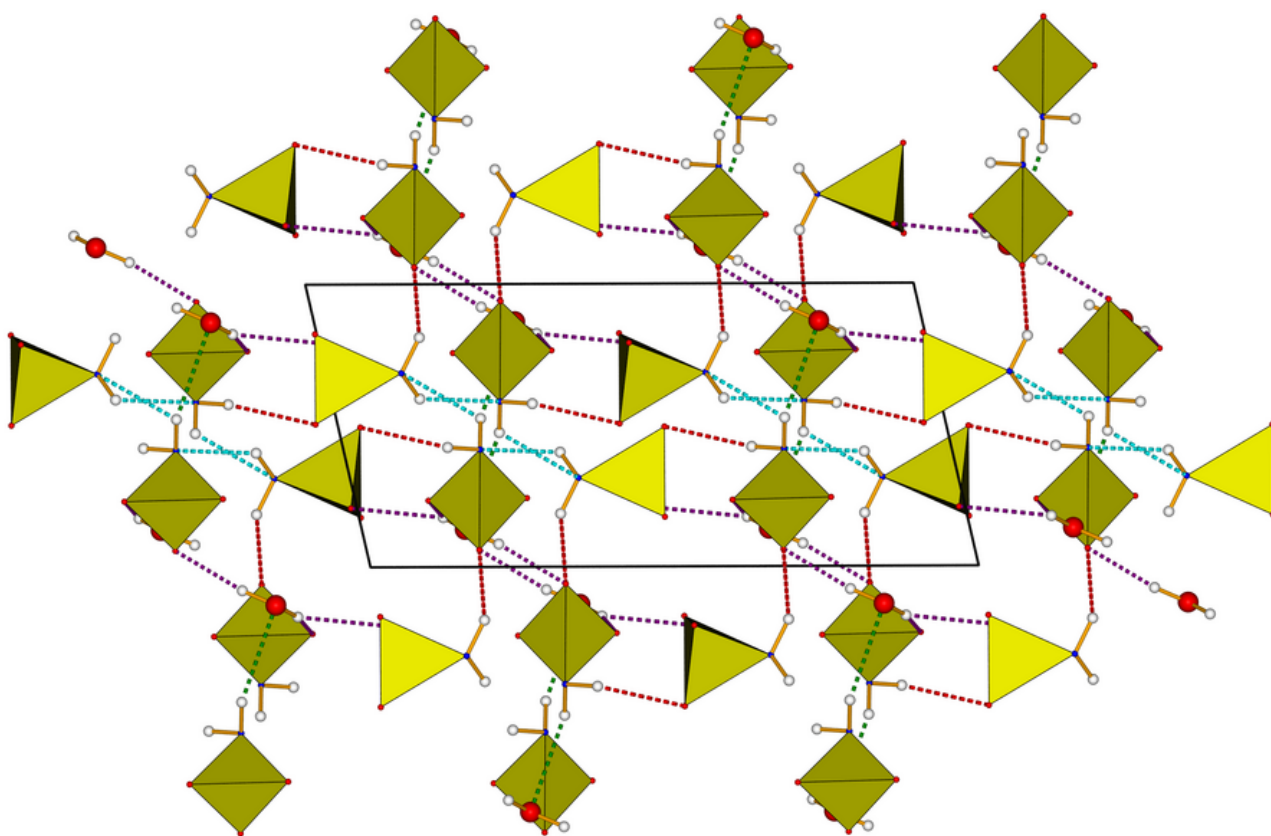

Figure S18: Hydrogen bonding pattern of Sr(NH<sub>2</sub>SO<sub>3</sub>)<sub>2</sub> · H<sub>2</sub>O viewed along [010] (H atoms in white, N atoms in blue, O atoms in red, SO<sub>3</sub>N tetrahedra in yellow). Hydrogen bonds are displayed as broken lines with colour coding as follows: N-H...O<sub>as</sub> in red, N-H...O<sub>w</sub> in dark green, N-H...N in light blue, O-H...O<sub>as</sub> in violet.

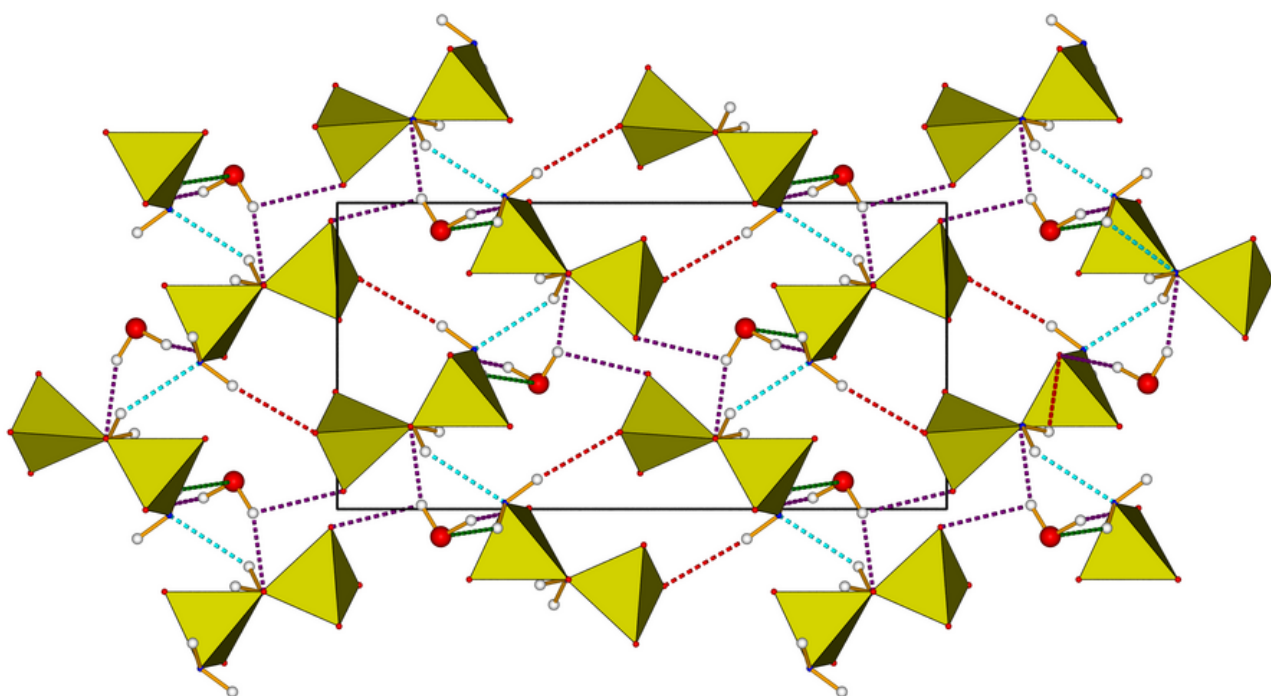

Figure S19: Hydrogen bonding pattern of  $\text{Sr}(\text{NH}_2\text{SO}_3)_2 \cdot \text{H}_2\text{O}$  viewed along  $[100]$  (H atoms in white, N atoms in blue, O atoms in red,  $\text{SO}_3\text{N}$  tetrahedra in yellow). Hydrogen bonds are displayed as broken lines with colour coding as follows:  $\text{N-H} \cdots \text{O}_{\text{as}}$  in red,  $\text{N-H} \cdots \text{O}_{\text{w}}$  in dark green,  $\text{N-H} \cdots \text{N}$  in light blue,  $\text{O-H} \cdots \text{O}_{\text{as}}$  in violet.

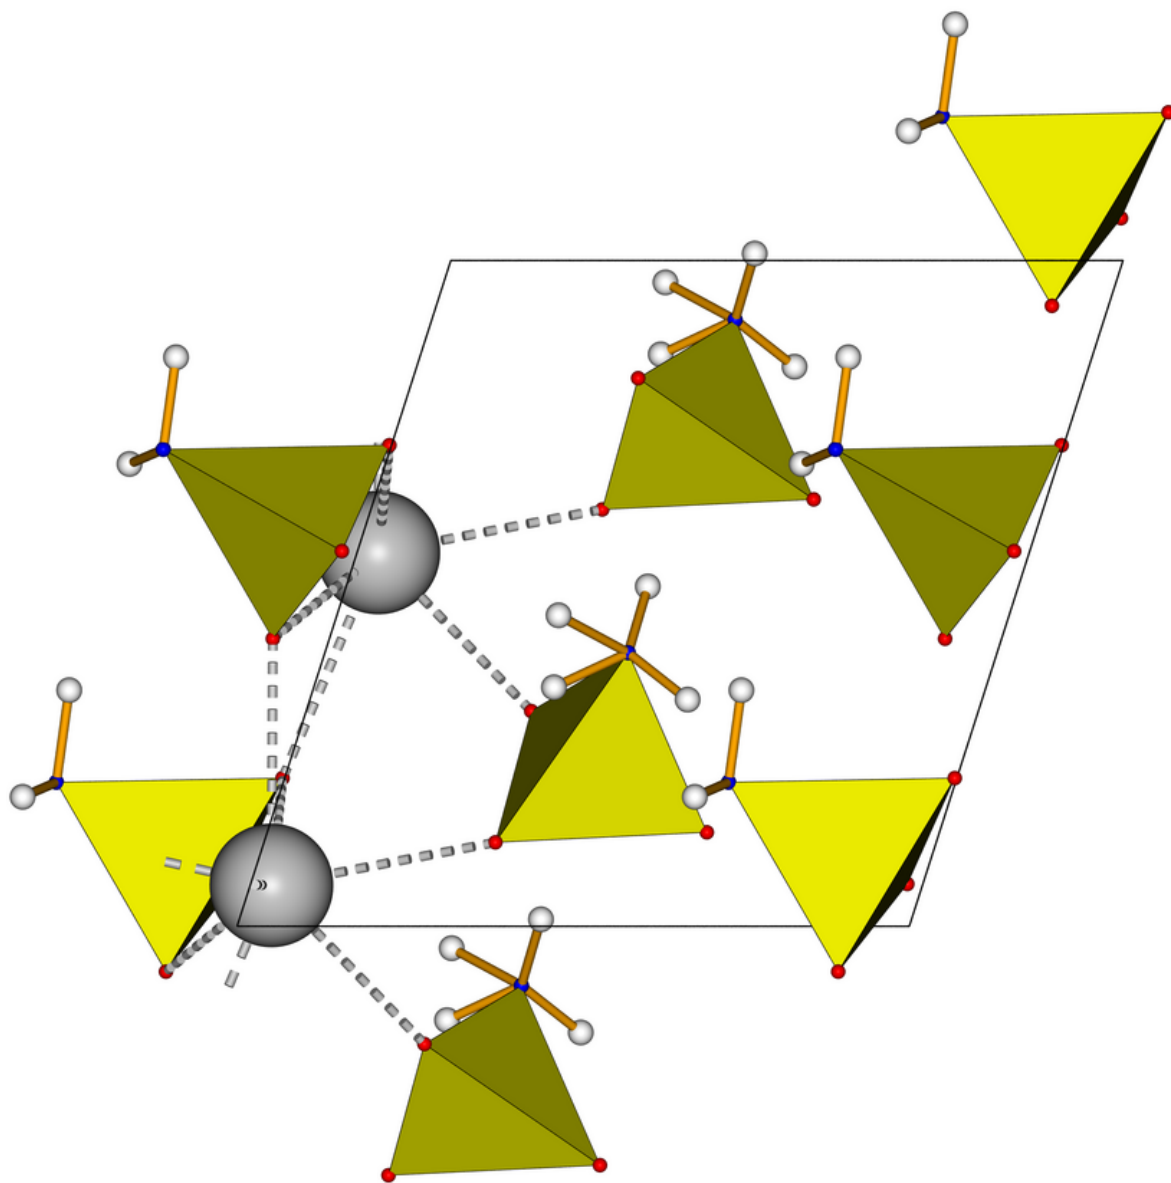

Figure S20: The unit cell of  $\beta$ - $\text{Sr}(\text{NH}_2\text{SO}_3)_2$  viewed along  $[001]$  (H atoms in white, N atoms in blue, O atoms in red,  $\text{SO}_3\text{N}$  tetrahedra in yellow, Sr atoms in grey, covalent bonds as yellow sticks and coordinate bonds as grey broken lines).



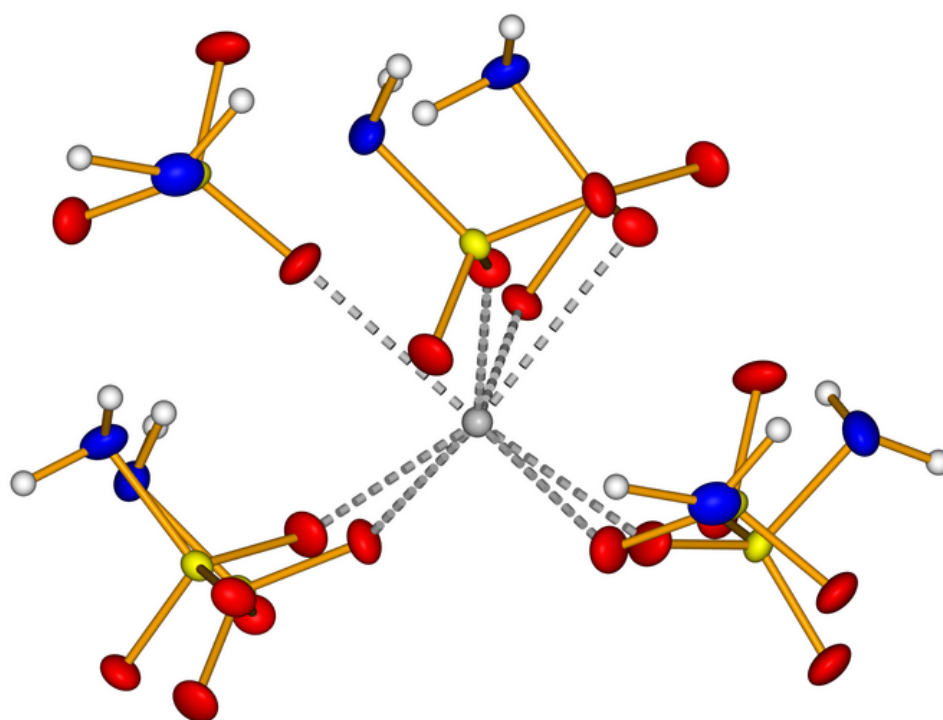

Figure S21: Coordination environment of Sr<sup>2+</sup> in  $\beta$ -Sr(NH<sub>2</sub>SO<sub>3</sub>) (H atoms in white, N atoms in blue, O atoms in red, S atoms in yellow, Sr atom in grey, covalent bonds as yellow sticks and coordinate bonds as grey broken lines; displacement ellipsoids for all atoms but hydrogen correspond to 70% probability level)

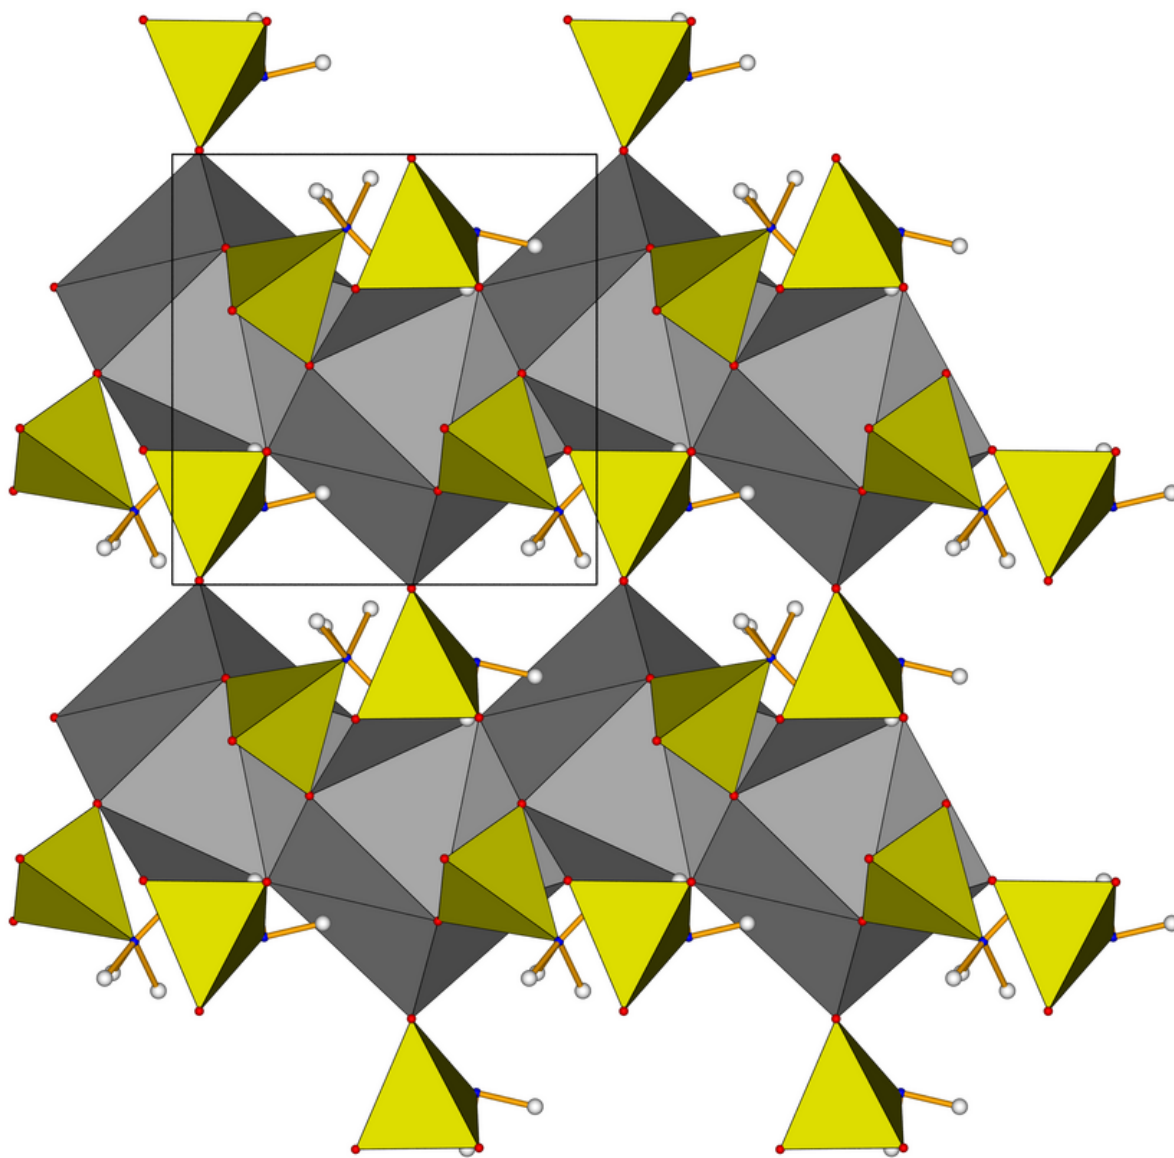

Figure S22: Zigzag chains of  $\text{SrO}_8$  antiprisms condensed via edge-sharing in  $\beta\text{-Sr}(\text{NH}_2\text{SO}_3)_2$  viewed along  $[100]$  (H atoms in white, N atoms in blue, O atoms in red,  $\text{SO}_3\text{N}$  tetrahedra in yellow,  $\text{SrO}_8$  antiprisms in grey and covalent bonds as yellow sticks).

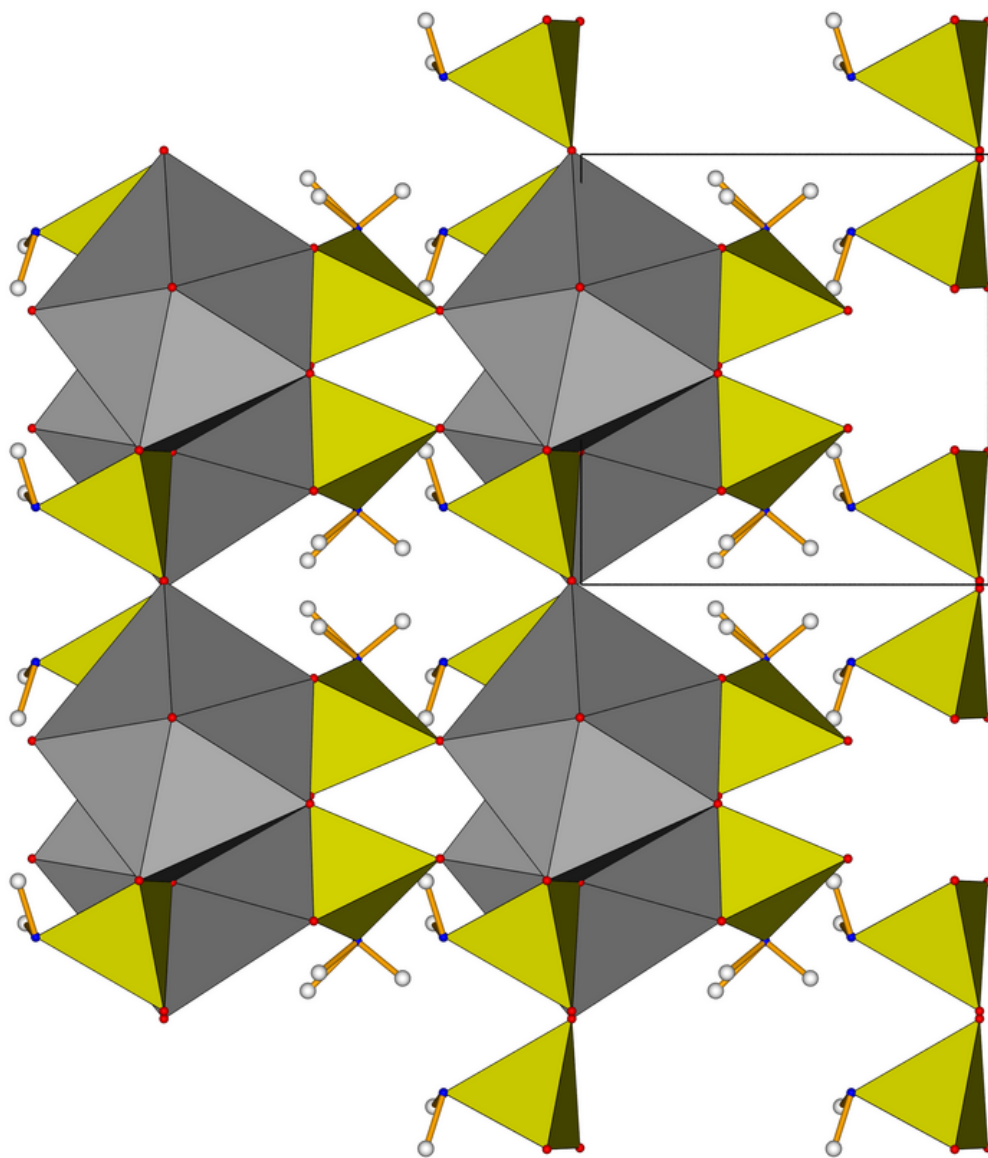

Figure S23: Rod packing of zigzag chains of  $\text{SrO}_8$  antiprims condensed via edge-sharing in  $\beta\text{-Sr}(\text{NH}_2\text{SO}_3)_2$  viewed along  $[001]$  (H atoms in white, N atoms in blue, O atoms in red,  $\text{SO}_3$  antiprisms in yellow,  $\text{SrO}_8\text{N}$  polyhedra in grey and covalent bonds as yellow sticks).

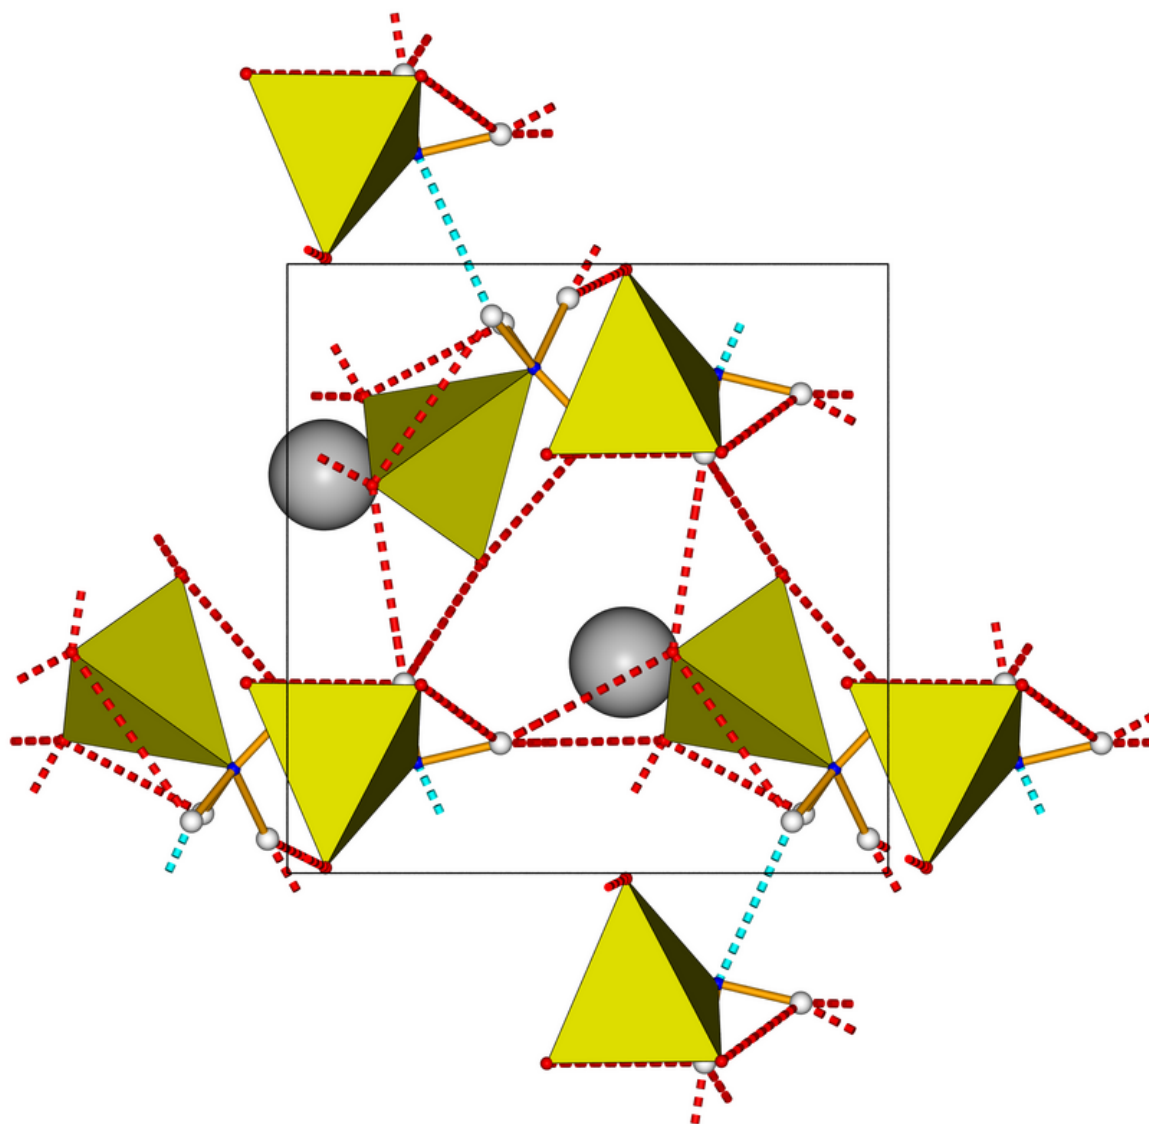

Figure S24: Hydrogen bonding pattern of  $\beta$ - $\text{Sr}(\text{NH}_2\text{SO}_3)_2$  viewed along  $[0\ 1\ 0]$  (H atoms in white, N atoms in blue, O atoms in red,  $\text{SO}_3\text{N}$  tetrahedra in yellow). Hydrogen bonds are displayed as broken lines with colour coding as follows:  $\text{N-H}\cdots\text{O}_{\text{as}}$  in red,  $\text{N-H}\cdots\text{N}$  in light blue.

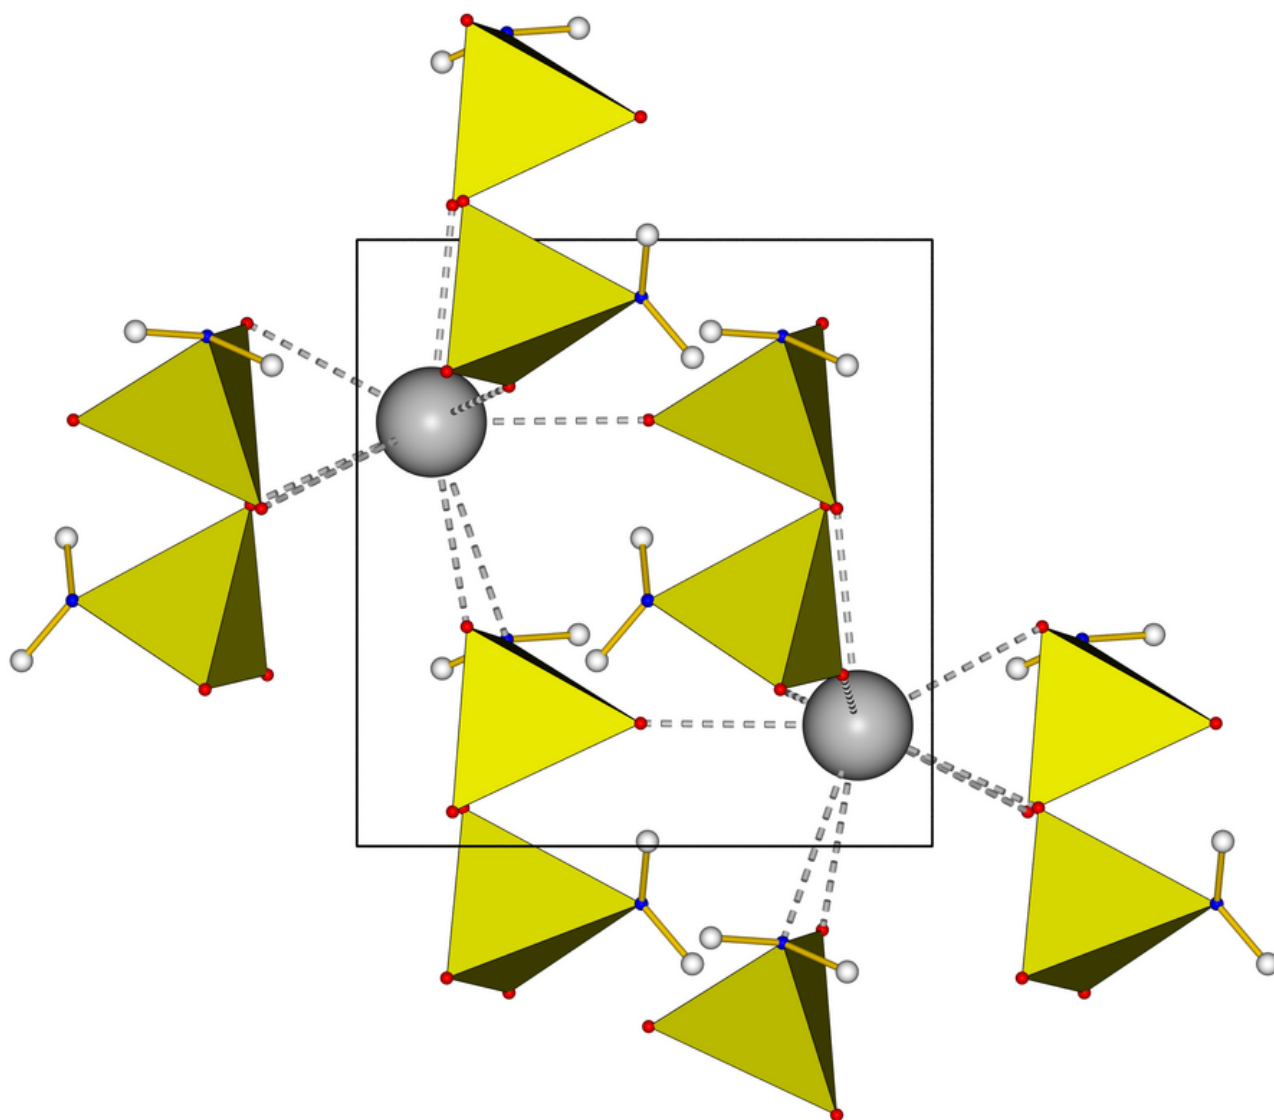

Figure S25: The unit cell of  $\alpha$ - $\text{Sr}(\text{NH}_2\text{SO}_3)_2$  viewed along  $[001]$  (H atoms in white, N atoms in blue, O atoms in red,  $\text{SO}_3\text{N}$  tetrahedra in yellow, Sr atoms in grey, covalent bonds as yellow sticks and coordinate bonds as grey broken lines).

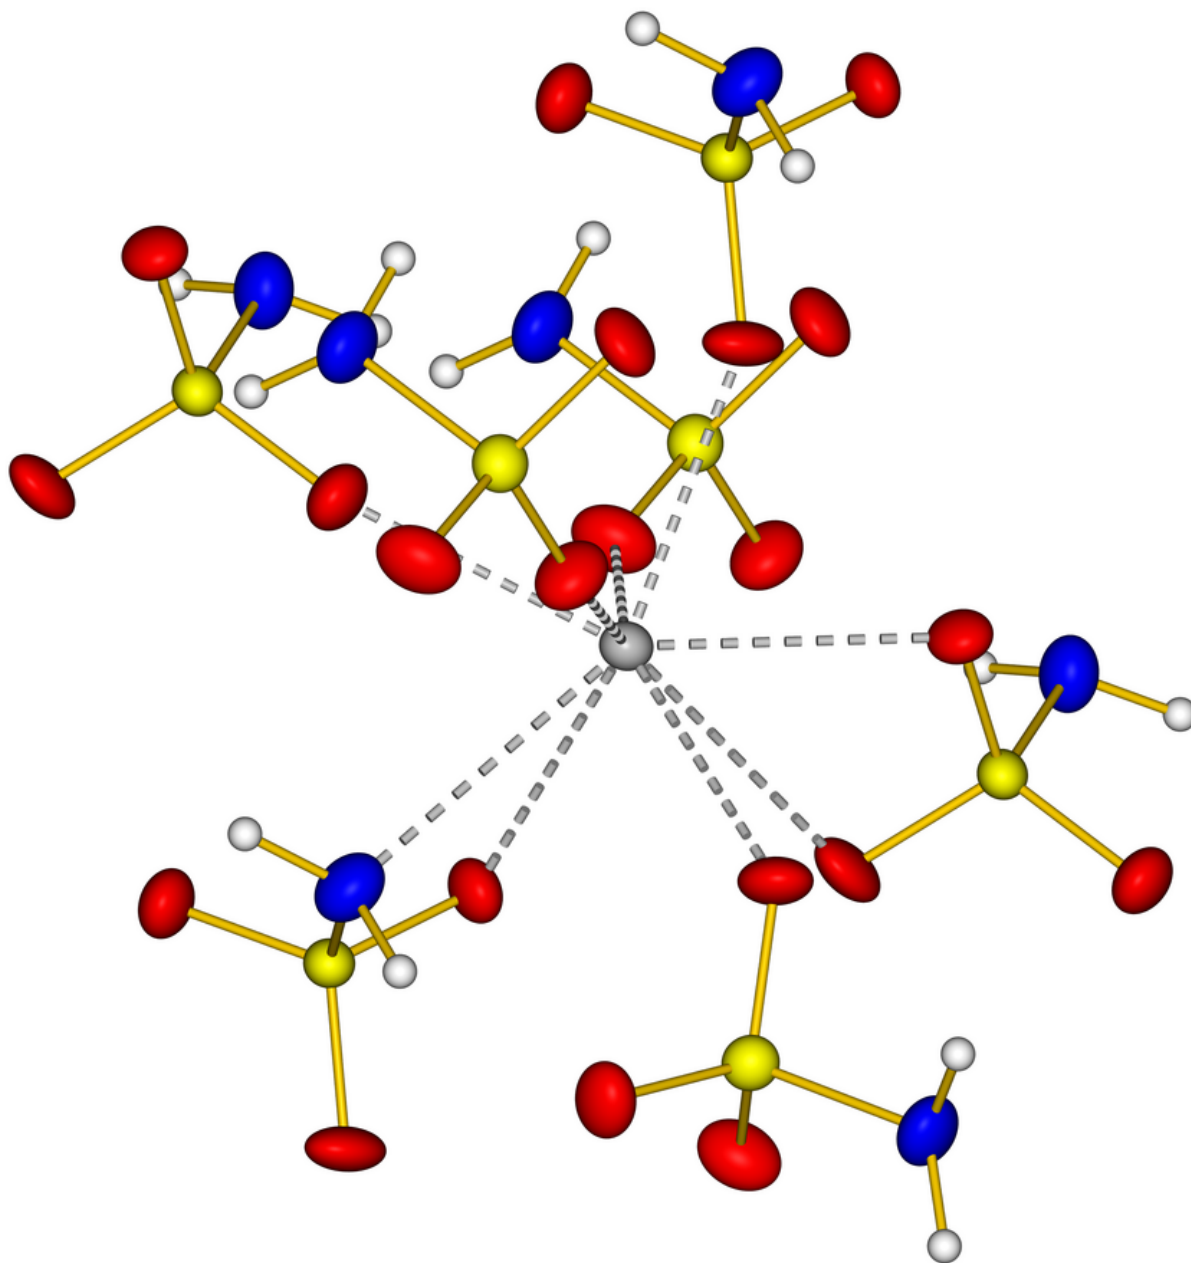

Figure S26: Coordination environment of Sr<sup>2+</sup> in  $\alpha$ -Sr(NH<sub>2</sub>SO<sub>3</sub>)<sub>2</sub> (H atoms in white, N atoms in blue, O atoms in red, S atoms in yellow, Sr atom in grey, covalent bonds as yellow sticks and coordinate bonds as grey broken lines; displacement ellipsoids for all atoms but hydrogen correspond to 70% probability level)

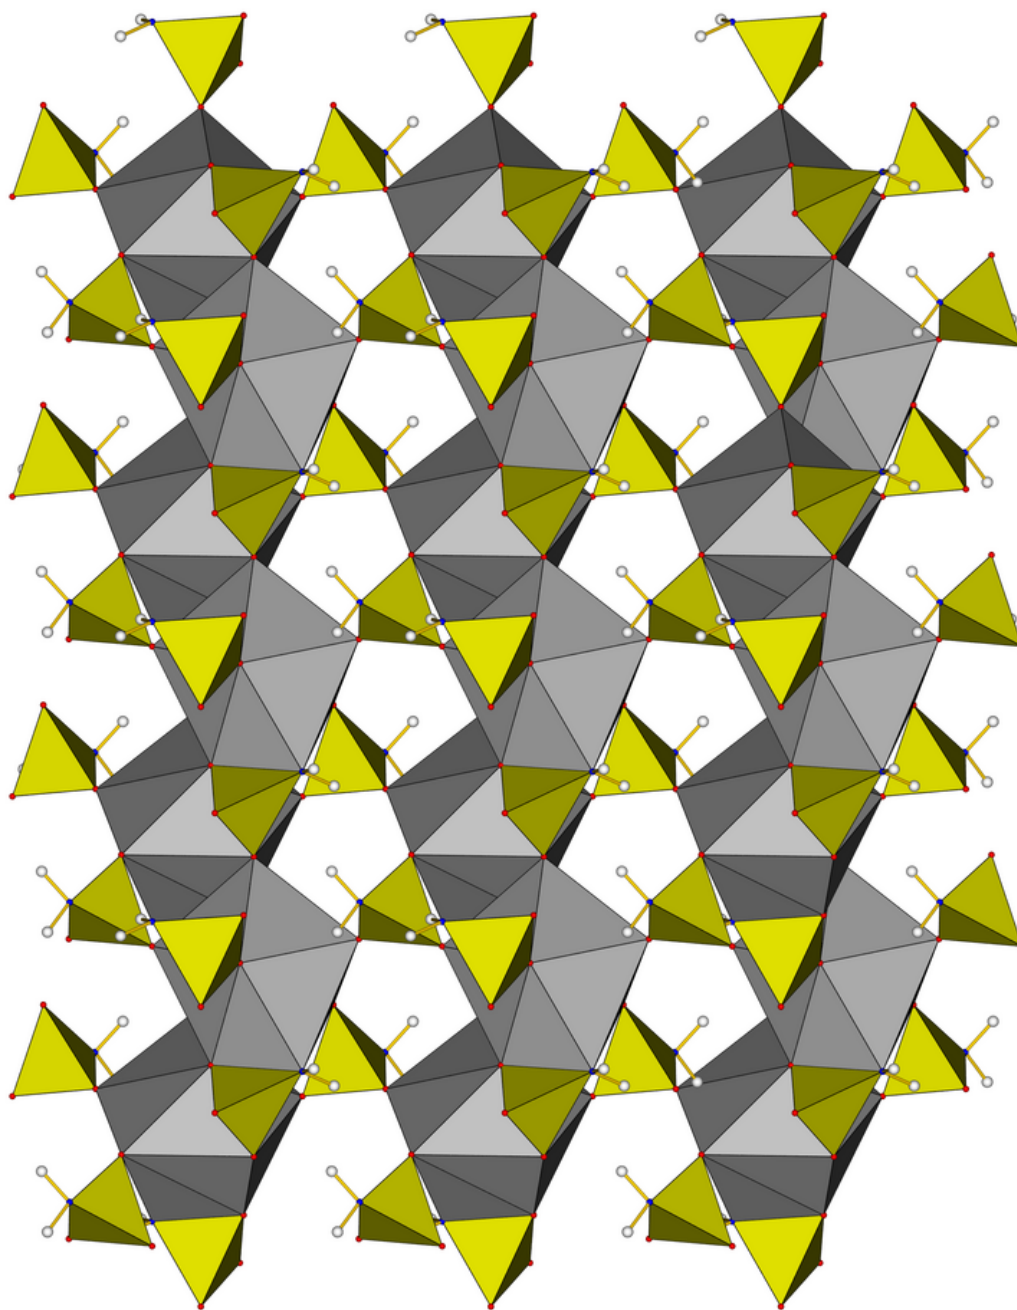

Figure S27: Zigzag chains of  $\text{SrO}_8\text{N}$  polyhedra condensed via edge-sharing in  $\alpha\text{-Sr}(\text{NH}_2\text{SO}_3)_2$  viewed along  $[100]$  (H atoms in white, N atoms in blue, O atoms in red,  $\text{SO}_3\text{N}$  tetrahedra in yellow,  $\text{SrO}_8\text{N}$  polyhedra in grey and covalent bonds as yellow sticks).



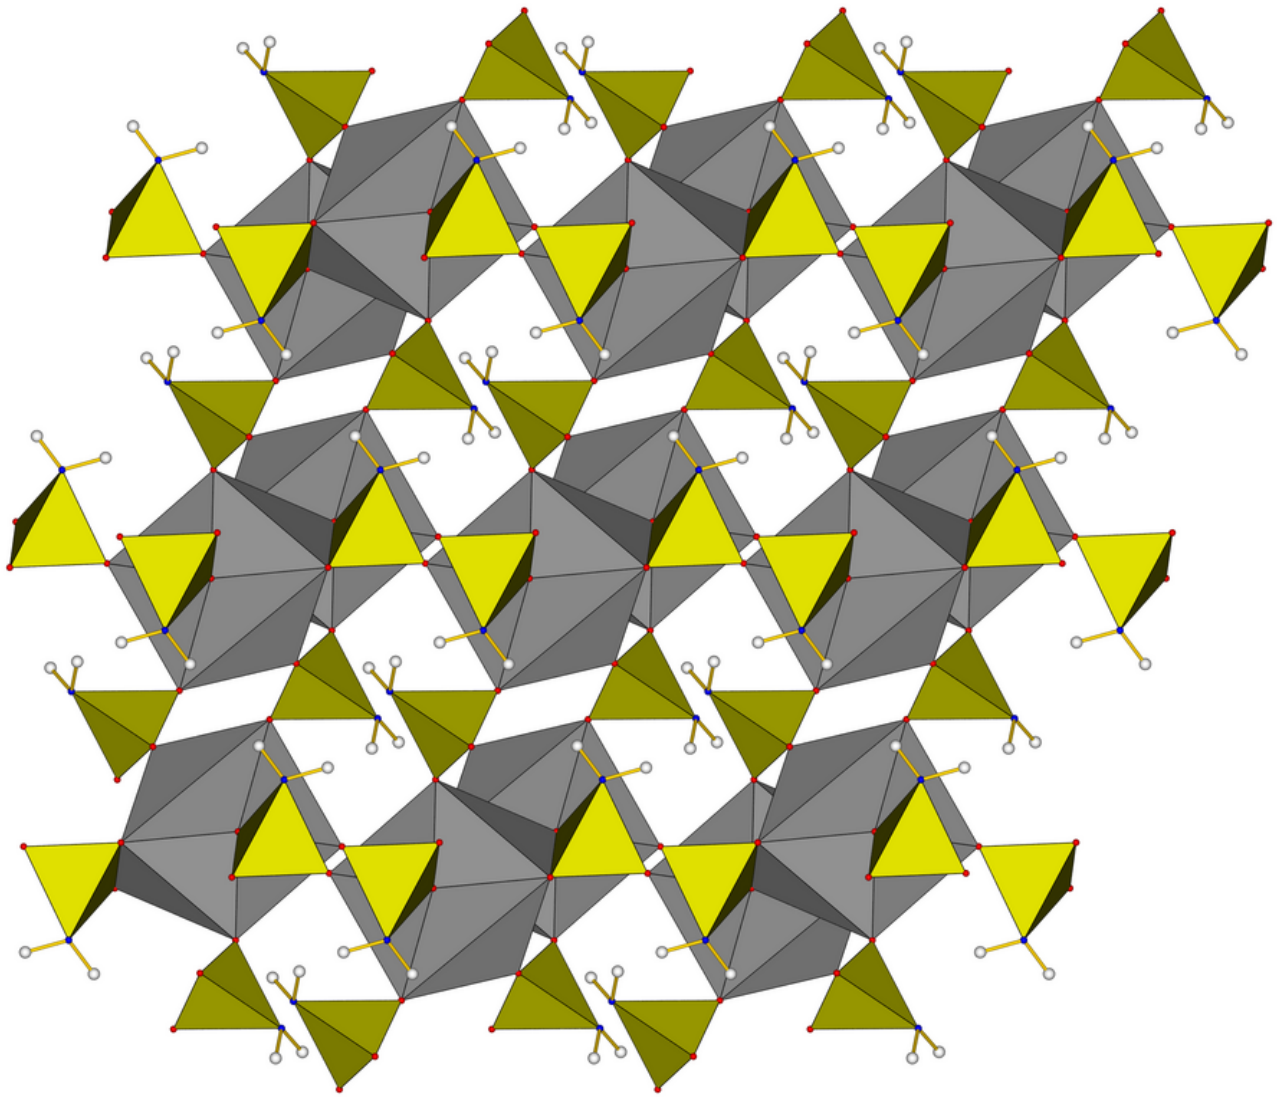

Figure S28: Rod packing of zigzag chains of  $\text{SrO}_8\text{N}$  polyhedra condensed via edge-sharing in  $\alpha\text{-Sr}(\text{NH}_2\text{SO}_3)_2$  viewed along  $[010]$  (H atoms in white, N atoms in blue, O atoms in red,  $\text{SO}_3\text{N}$  tetrahedra in yellow,  $\text{SrO}_8\text{N}$  polyhedra in grey and covalent bonds as yellow sticks).



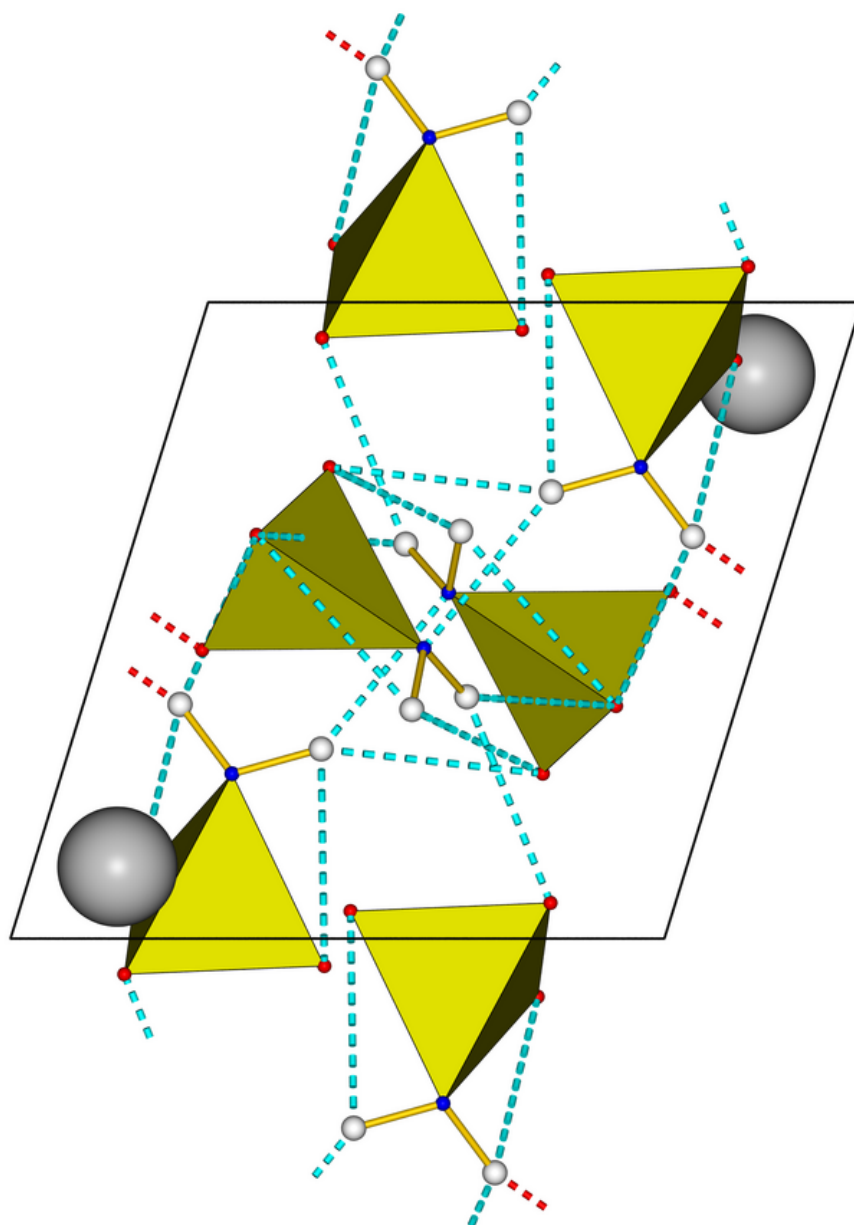

Figure S29: Hydrogen bonding pattern of  $\alpha$ - $\text{Sr}(\text{NH}_2\text{SO}_3)_2$  viewed along  $[0\ 1\ 0]$  (H atoms in white, N atoms in blue, O atoms in red,  $\text{SO}_3\text{N}$  tetrahedra in yellow). Hydrogen bonds are displayed as broken lines with colour coding as follows:  $\text{N-H}\cdots\text{O}_{\text{as}}$  in red,  $\text{N-H}\cdots\text{N}$  in light blue.

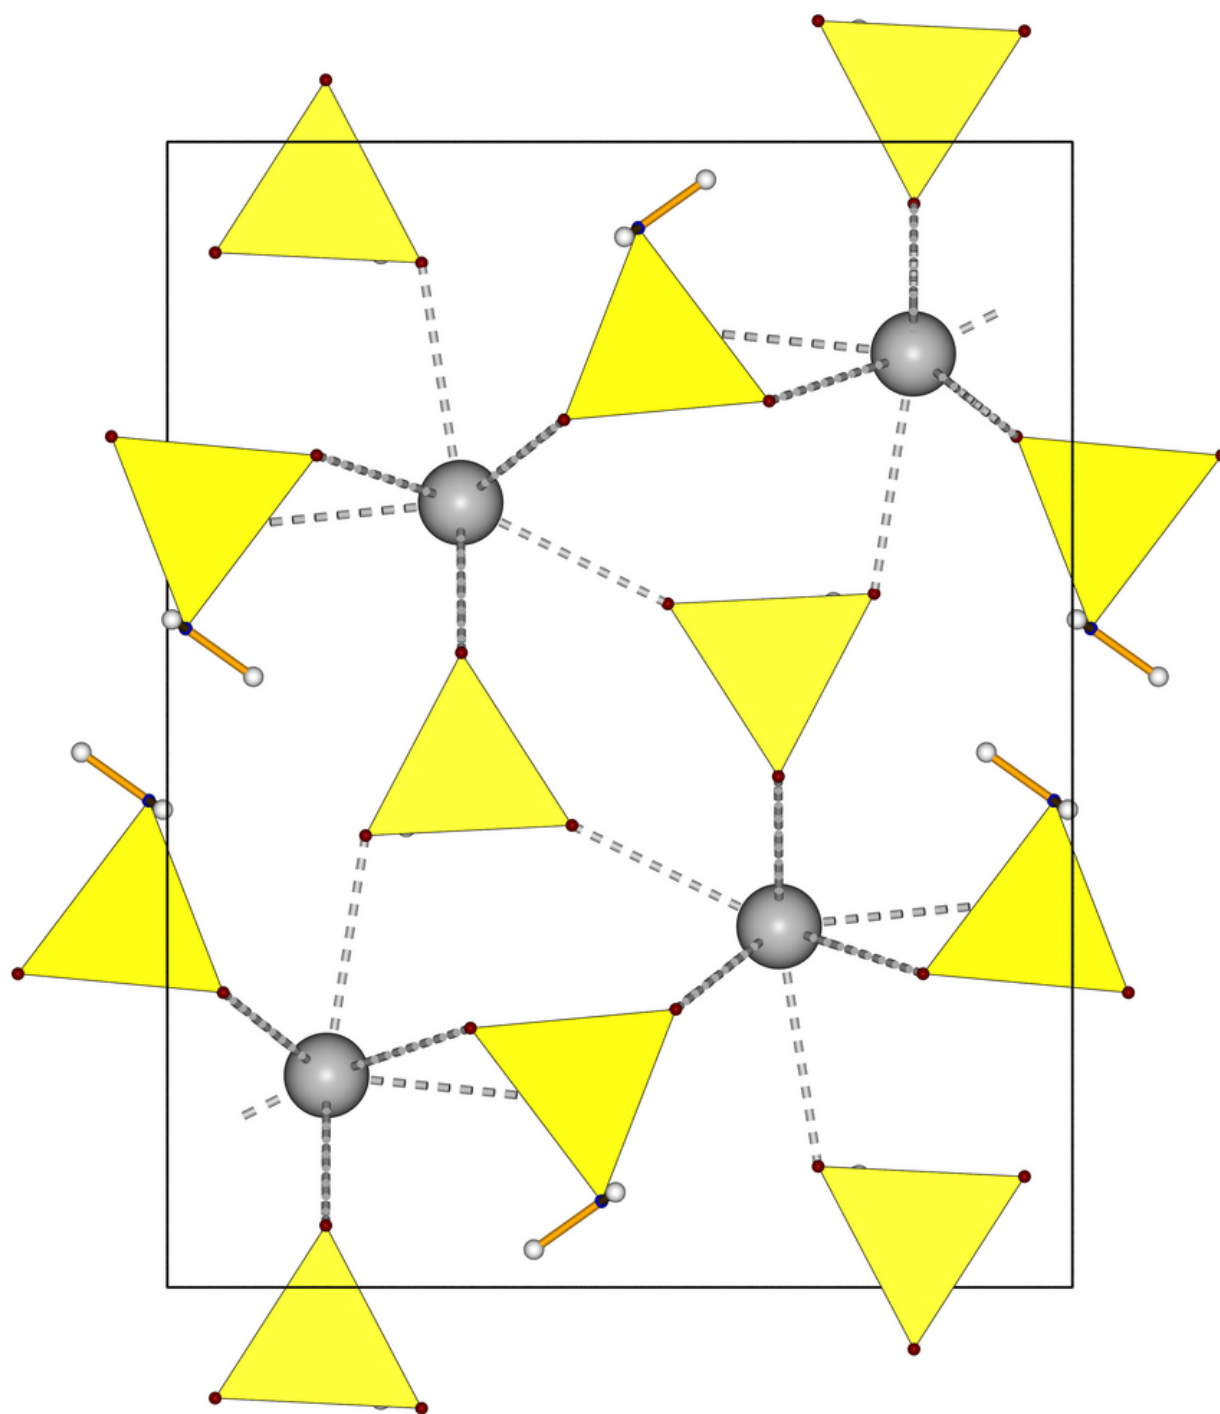

Figure S30: The unit cell of  $\text{Ba}(\text{NH}_2\text{SO}_3)_2$  viewed along  $[001]$  (H atoms in white, N atoms in blue, O atoms in red,  $\text{SO}_3\text{N}$  tetrahedra in yellow, Sr atoms in grey, covalent bonds as yellow sticks and coordinate bonds as grey broken lines).

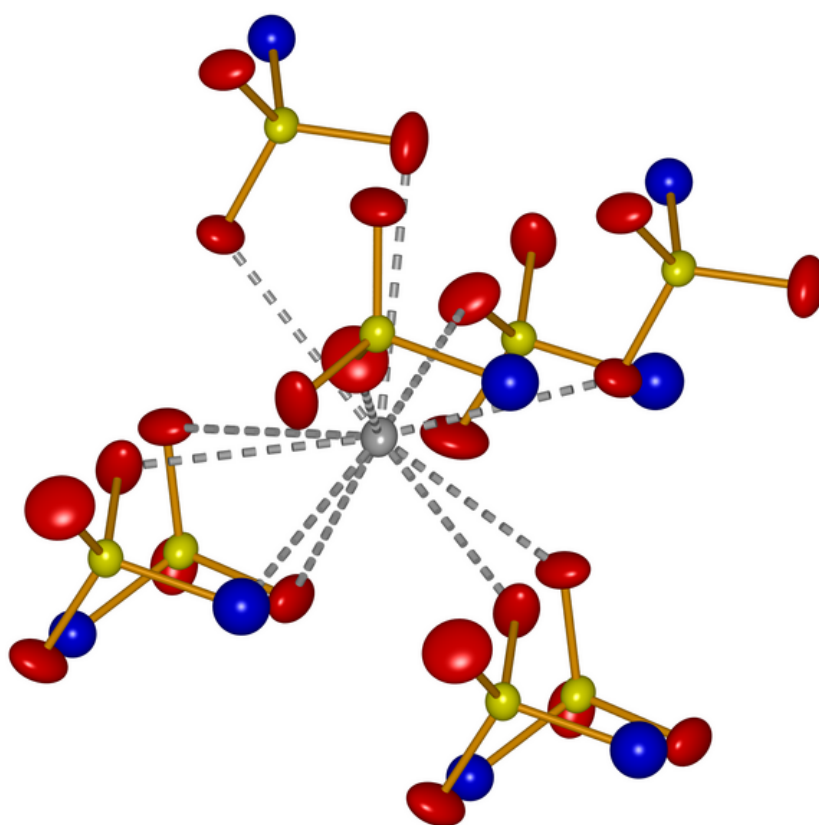

Figure S31: Coordination environment of  $\text{Ba}^{2+}$  in  $\text{Ba}(\text{NH}_2\text{SO}_3)_2$  (H atoms in white, N atoms in blue, O atoms in red, S atoms in yellow, Ba atom in grey, covalent bonds as yellow sticks and coordinate bonds as grey broken lines; displacement ellipsoids for all atoms but hydrogen correspond to 70% probability level)

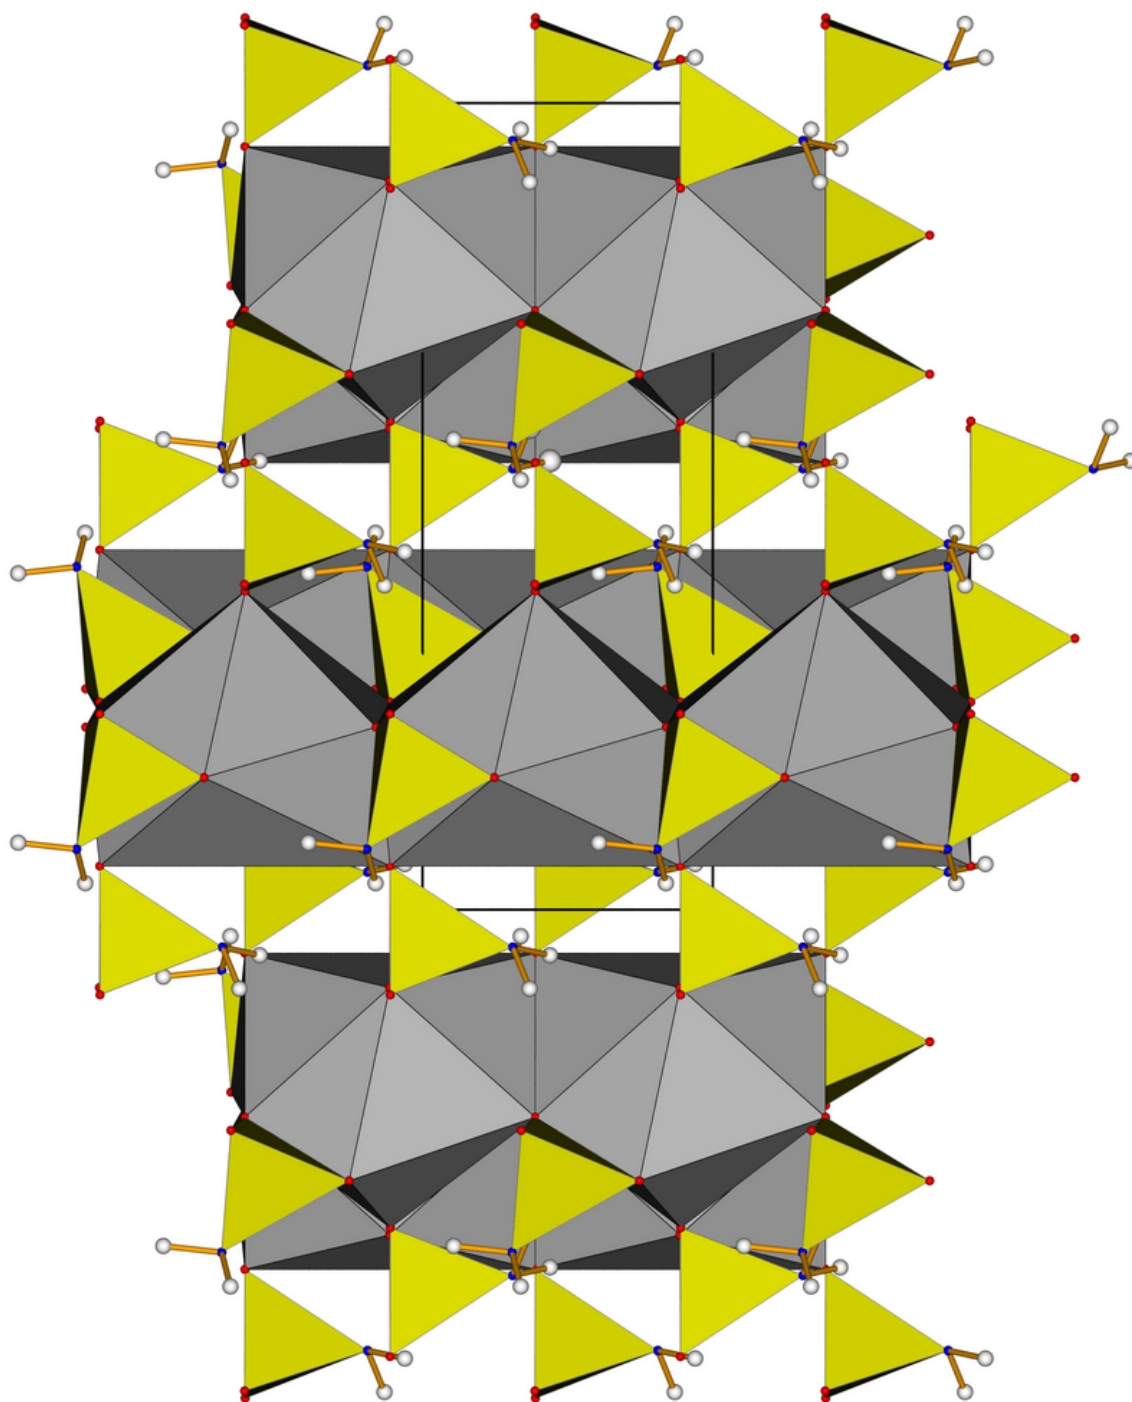

Figure S32: Chains of BaO<sub>10</sub>N polyhedra condensed via face-sharing in Ba(NH<sub>2</sub>SO<sub>3</sub>)<sub>2</sub> viewed along [100] (H atoms in white, N atoms in blue, O atoms in red, SO<sub>3</sub>N tetrahedra in yellow, BaO<sub>10</sub>N polyhedra in grey and covalent bonds as yellow sticks).

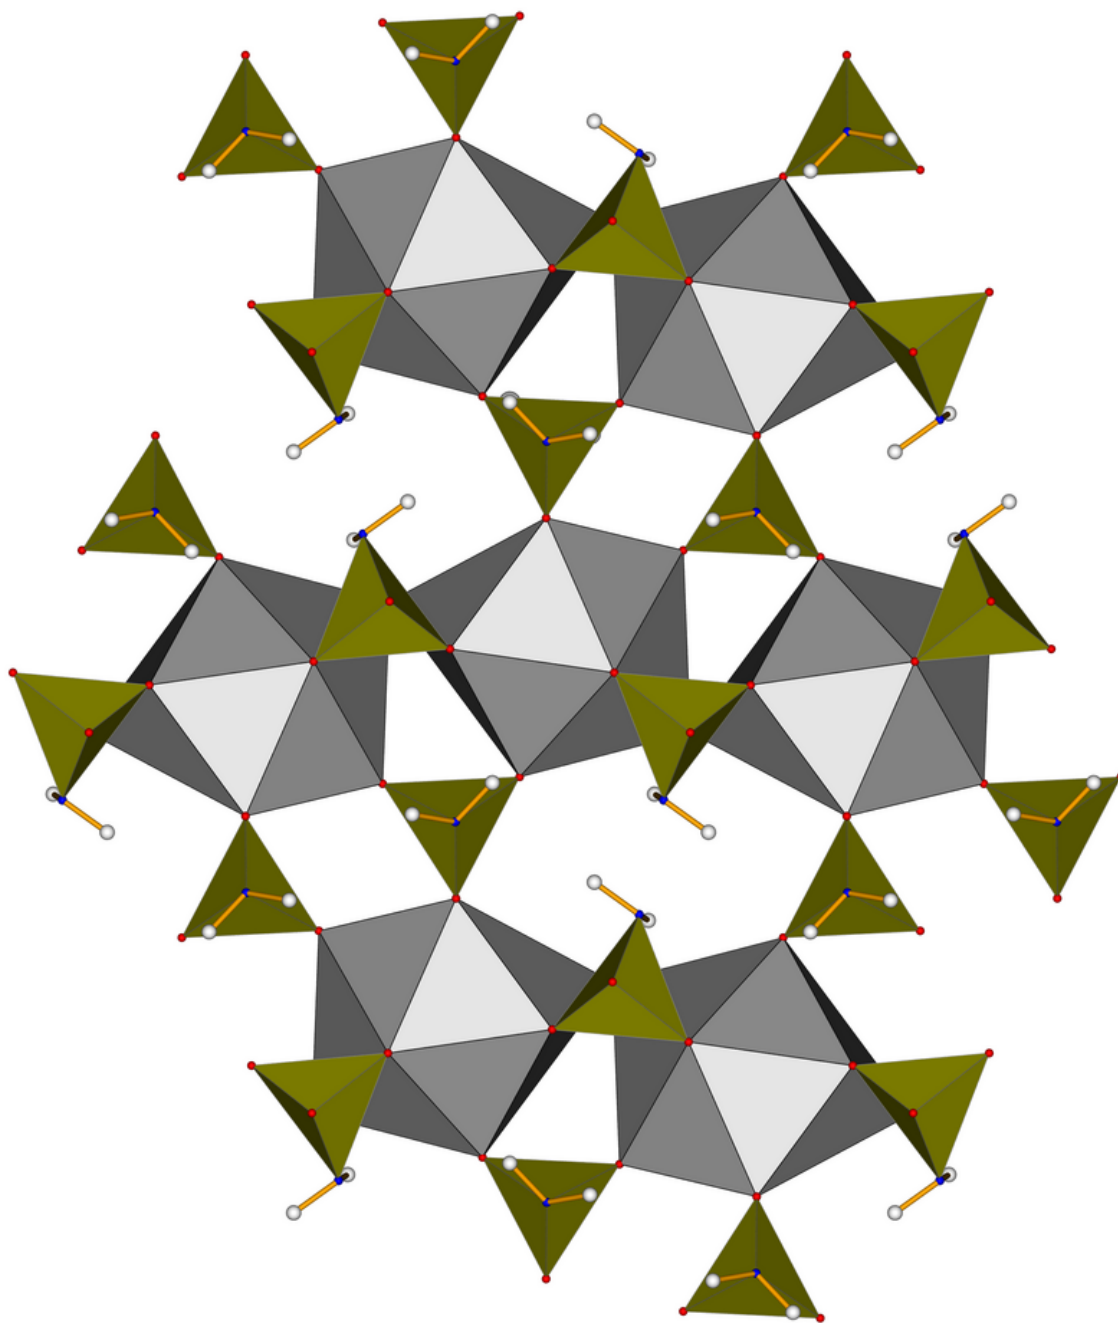

Figure S33: Chains of BaO<sub>10</sub>N polyhedra condensed via face-sharing in Ba(NH<sub>2</sub>SO<sub>3</sub>)<sub>2</sub> viewed along [001] (H atoms in white, N atoms in blue, O atoms in red, SO<sub>3</sub>N tetrahedra in yellow, BaO<sub>10</sub>N polyhedra in grey and covalent bonds as yellow sticks).

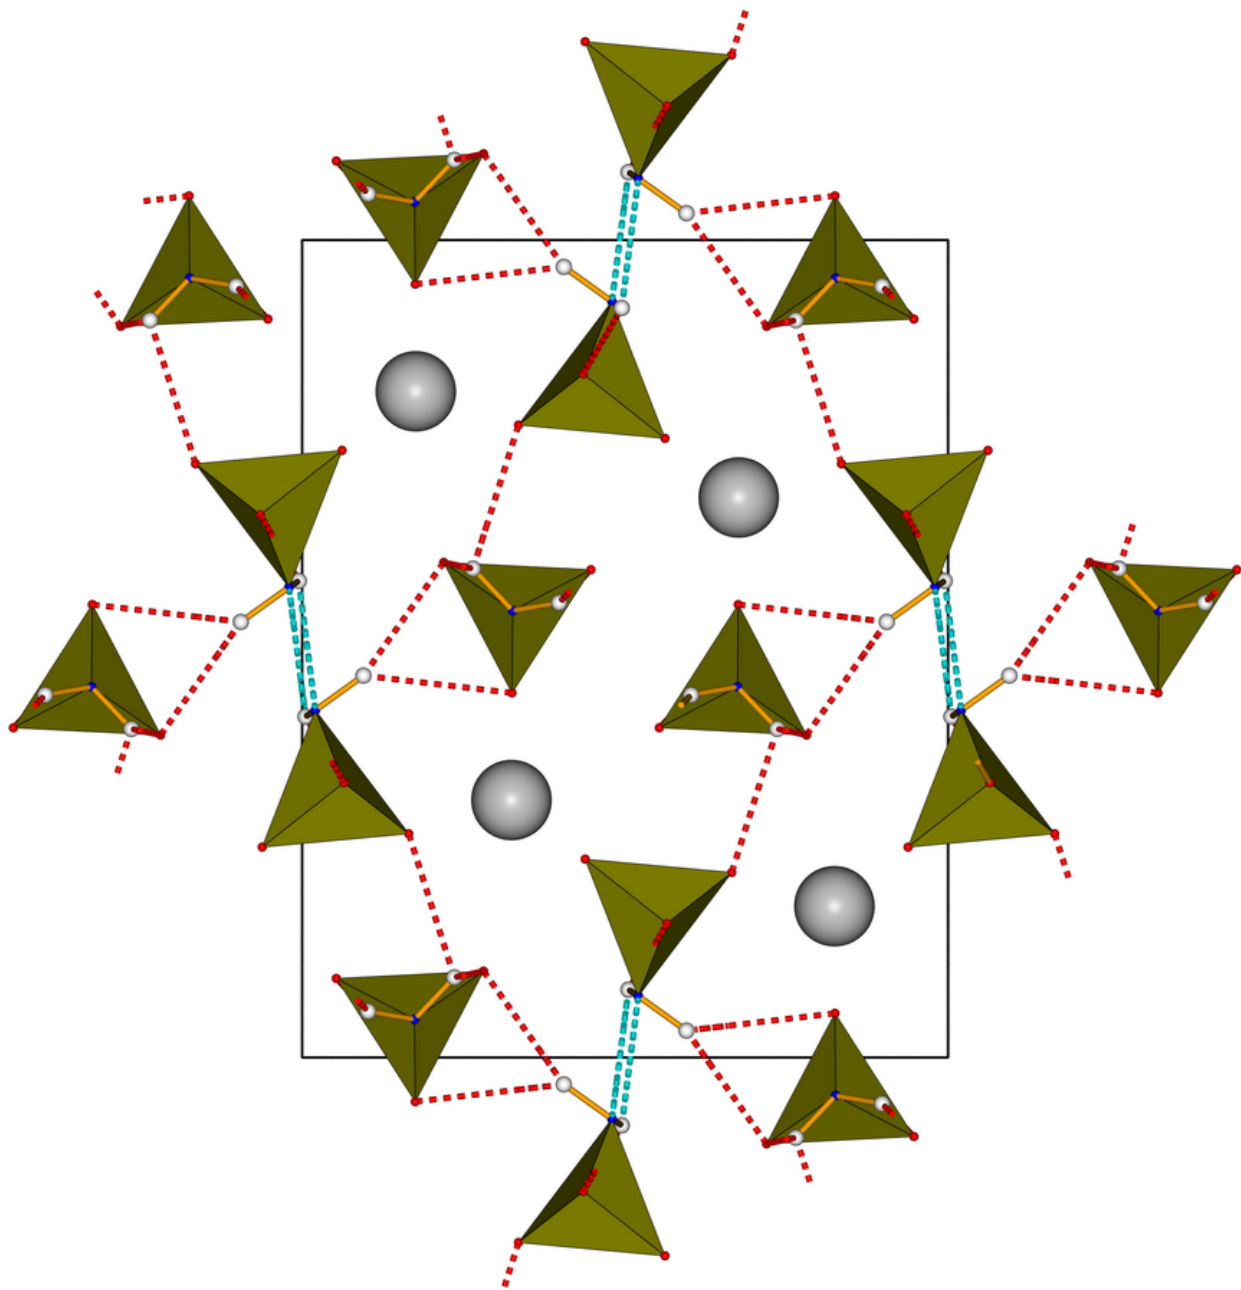

Figure S34: Hydrogen bonding pattern of  $\text{Ba}(\text{NH}_2\text{SO}_3)_2$  viewed along  $[001]$  (H atoms in white, N atoms in blue, O atoms in red, Ba atoms in grey and  $\text{SO}_3\text{N}$  tetrahedra in yellow). Hydrogen bonds are displayed as broken lines with colour coding as follows:  $\text{N-H}\cdots\text{O}_{\text{as}}$  in red,  $\text{N-H}\cdots\text{N}$  in light blue.

Table S1: Selected interatomic distances in Å, angles in ° and deviations from ideal tetrahedral symmetry  $\Delta$  in % (calculated according to the method of Balić-Zumić and Makovicky[1, 2]) for Mg(NH<sub>2</sub>SO<sub>3</sub>)<sub>2</sub> · 4H<sub>2</sub>O (1), Mg(NH<sub>2</sub>SO<sub>3</sub>)<sub>2</sub> · 3H<sub>2</sub>O (2), Ca(NH<sub>2</sub>SO<sub>3</sub>)<sub>2</sub> · 4H<sub>2</sub>O (3), Ca(NH<sub>2</sub>SO<sub>3</sub>)<sub>2</sub> · H<sub>2</sub>O (4), Sr(NH<sub>2</sub>SO<sub>3</sub>)<sub>2</sub> · 4H<sub>2</sub>O (5), Sr(NH<sub>2</sub>SO<sub>3</sub>)<sub>2</sub> · H<sub>2</sub>O (6), β-Sr(NH<sub>2</sub>SO<sub>3</sub>)<sub>2</sub> (7), α-Sr(NH<sub>2</sub>SO<sub>3</sub>)<sub>2</sub> (8) and Ba(NH<sub>2</sub>SO<sub>3</sub>)<sub>2</sub> (9), as well as the sum of the corresponding ionic radii  $\sum_i r_i$ .

|                   | (1)         | (2)         | (3)         | (4)         | (5)         | (6)         | (7)         | (8)         | (9)         |
|-------------------|-------------|-------------|-------------|-------------|-------------|-------------|-------------|-------------|-------------|
| S-O               | 1.44–1.45   | 1.44–1.47   | 1.45–1.46   | 1.45–1.46   | 1.45–1.46   | 1.44–1.46   | 1.45–1.47   | 1.45–1.46   | 1.44–1.46   |
| $\sum_i r_i=1.46$ |             |             |             |             |             |             |             |             |             |
| S-N               | 1.65        | 1.64–1.65   | 1.63        | 1.62–1.64   | 1.63        | 1.63        | 1.61–1.63   | 1.63        | 1.63        |
| $\sum_i r_i=1.58$ |             |             |             |             |             |             |             |             |             |
| O:png-s-O         | 111.2–113.8 | 110.4–113.9 | 111.2–112.4 | 109.8–112.9 | 111.6–112.4 | 109.4–113.7 | 107.0–113.1 | 109.0–113.6 | 109.8–113.4 |
| O:png-s-N         | 104.4–109.7 | 104.8–109.9 | 105.2–108.9 | 104.7–112.3 | 105.5–108.7 | 104.9–110.3 | 104.6–111.0 | 104.2–111.8 | 104.3–111.0 |
| $\Delta$ (S1/S2)  | -0.49       | -0.47/-0.55 | -0.31       | -0.59/-0.45 | -0.34       | -0.28/-0.44 | -0.50/-0.49 | -0.41/-0.44 | -0.24       |
| M-O/N*            | 2.04–2.09   | 2.02–2.10   | 2.43–2.50   | 2.23–2.44   | 2.55–2.60   | 2.56–2.66   | 2.53–2.79   | 2.55–3.04   | 2.69–3.33   |
| $\sum_i r_i$      | 2.08        | 2.08        | 2.48        | 2.42        | 2.62        | 2.62        | 2.64        | 2.67        | 2.93        |

\* M=Mg,Ca,Sr,Ba

Table S2: Interatomic distances  $d$  (in Å) and angles  $\angle$  (in °) for hydrogen bonds between donor atom  $D$  and acceptor atoms  $A$  in  $\text{Mg}(\text{NH}_2\text{SO}_3)_2 \cdot 4\text{H}_2\text{O}$  (1),  $\text{Mg}(\text{NH}_2\text{SO}_3)_2 \cdot 3\text{H}_2\text{O}$  (2),  $\text{Ca}(\text{NH}_2\text{SO}_3)_2 \cdot 4\text{H}_2\text{O}$  (3),  $\text{Ca}(\text{NH}_2\text{SO}_3)_2 \cdot \text{H}_2\text{O}$  (4),  $\text{Sr}(\text{NH}_2\text{SO}_3)_2 \cdot 4\text{H}_2\text{O}$  (5),  $\text{Sr}(\text{NH}_2\text{SO}_3)_2 \cdot \text{H}_2\text{O}$  (6),  $\beta$ - $\text{Sr}(\text{NH}_2\text{SO}_3)_2$  (7),  $\alpha$ - $\text{Sr}(\text{NH}_2\text{SO}_3)_2$  (8) and  $\text{Ba}(\text{NH}_2\text{SO}_3)_2$  (9).

| $D$ -H   | $A$ | $d(\text{H}-A)$ | $\angle DHA$ | $d(D-A)$ | $D$ -H | $A$ | $d(\text{H}-A)$ | $\angle DHA$ | $d(D-A)$ |
|----------|-----|-----------------|--------------|----------|--------|-----|-----------------|--------------|----------|
| (1)      |     |                 |              |          | (6)    |     |                 |              |          |
| N1-HN11  | O2  | 2.48            | 150.6        | 3.36     | OW-HW2 | O22 | 1.93            | 163.8        | 2.87     |
| N1-HN11  | O3  | 2.43            | 150.6        | 3.31     | OW-HW2 | O22 | 1.93            | 163.8        | 2.87     |
| N1-HN12  | O2  | 2.20            | 154.7        | 3.10     | OW-HW1 | O21 | 1.95            | 155.7        | 2.86     |
| OW1-HW11 | OW2 | 2.01            | 168.1        | 2.82     | N1-H12 | N2  | 2.31            | 137.0        | 3.10     |
| OW1-HW12 | O2  | 1.99            | 161.9        | 2.75     | OW-HW1 | O11 | 2.33            | 113.1        | 2.85     |
| OW2-HW21 | O3  | 2.08            | 153.2        | 2.74     | N2-H22 | O12 | 2.46            | 168.8        | 3.45     |
| OW2-HW22 | N1  | 2.11            | 159.7        | 2.90     | N1-H11 | O22 | 2.50            | 119.1        | 3.11     |
|          |     |                 |              |          | N2-H21 | OW  | 2.52            | 142.5        | 3.34     |
|          |     |                 |              |          | N2-H21 | N1  | 2.53            | 128.1        | 3.23     |
| (2)      |     |                 |              |          | (7)    |     |                 |              |          |
| OW2-HW21 | O21 | 1.65            | 165.6        | 2.73     | N1-H11 | O11 | 1.93            | 108.7        | 2.44     |
| OW1-HW12 | O12 | 1.80            | 171.6        | 2.74     | N1-H12 | N2  | 2.11            | 150.4        | 3.01     |
| OW3-HW31 | O22 | 1.81            | 169.7        | 2.76     | N1-H12 | O12 | 2.41            | 80.7         | 2.45     |
| OW2-HW22 | O13 | 1.94            | 168.3        | 2.89     | N1-H13 | O11 | 2.27            | 129.4        | 3.13     |
| OW1-HW11 | N1  | 1.96            | 160.4        | 2.89     | N1-H14 | N2  | 2.51            | 110.5        | 3.03     |
| OW3-HW32 | OW1 | 2.04            | 161.0        | 2.97     | N1-H14 | O13 | 2.34            | 89.1         | 2.54     |
| N1-H12   | O12 | 2.07            | 164.9        | 3.02     | N2-H21 | O12 | 2.38            | 162.0        | 3.34     |
| N1-H11   | N2  | 2.14            | 178.4        | 3.10     | N2-H21 | O11 | 2.38            | 133.4        | 3.15     |
| N2-H22   | O21 | 2.18            | 152.7        | 3.06     | N2-H21 | O21 | 2.50            | 80.0         | 2.53     |
| N2-H21   | O22 | 2.21            | 146.7        | 3.06     | N2-H22 | O12 | 2.33            | 156.1        | 3.26     |
|          |     |                 |              |          | N2-H22 | O23 | 2.36            | 84.1         | 2.46     |
|          |     |                 |              |          | N2-H22 | O13 | 2.38            | 137.7        | 3.18     |
| (3)      |     |                 |              |          | (8)    |     |                 |              |          |
| OW1-HW11 | O2  | 1.98            | 171.2        | 2.86     | N1-H11 | O21 | 2.13            | 154.5        | 3.06     |
| OW1-HW12 | O2  | 2.00            | 169.4        | 2.90     | N1-H12 | N2  | 2.20            | 144.3        | 3.06     |
| OW2-HW21 | OW1 | 2.10            | 167.3        | 2.96     | N2-H22 | O23 | 2.34            | 149.2        | 3.23     |
| N1-H12   | O1  | 2.11            | 159.2        | 3.05     | N2-H22 | O13 | 2.42            | 122.6        | 3.06     |
| N1-H11   | OW2 | 2.20            | 147.8        | 3.08     | N1-H12 | O22 | 2.48            | 112.2        | 3.38     |
| N1-H13   | N1  | 2.25            | 155.5        | 3.17     | N2-H21 | O23 | 2.54            | 73.0         | 2.44     |
|          |     |                 |              |          | N1-H12 | O12 | 2.55            | 75.2         | 2.49     |
| (4)      |     |                 |              |          | (9)    |     |                 |              |          |
| N1-H12   | O11 | 2.10            | 108.6        | 3.07     | N1-H12 | O13 | 2.14            | 143.3        | 2.99     |
| OW-HW2   | O12 | 1.96            | 158.2        | 2.89     | N2-H22 | O22 | 2.29            | 142.9        | 3.13     |
| N2-H22   | N1  | 2.28            | 153.1        | 3.19     | N1-H11 | O23 | 2.29            | 161.0        | 3.23     |
| OW-HW1   | O22 | 2.30            | 168.1        | 3.02     | N2-H21 | O23 | 2.36            | 83.5         | 2.46     |
| N2-H21   | O23 | 2.37            | 134.5        | 3.14     | N1-H11 | O21 | 2.46            | 137.9        | 3.26     |
| OW-HW1   | O21 | 2.42            | 133.7        | 3.17     | N2-H21 | O12 | 2.47            | 116.7        | 3.05     |
| N1-H11   | N2  | 2.61            | 148.4        | 3.48     | N2-H21 | O23 | 2.55            | 115.4        | 3.11     |
|          |     |                 |              |          | N1-H12 | N1  | 2.58            | 118.5        | 3.17     |
| (5)      |     |                 |              |          |        |     |                 |              |          |
| OW2-HW22 | O1  | 2.06            | 166.5        | 2.89     |        |     |                 |              |          |
| OW2-HW21 | O1  | 2.07            | 170.4        | 2.87     |        |     |                 |              |          |
| OW1-HW11 | O1  | 2.17            | 152.8        | 2.92     |        |     |                 |              |          |
| OW1-HW12 | OW2 | 2.22            | 154.7        | 2.94     |        |     |                 |              |          |
| N1-H11   | O3  | 2.18            | 153.7        | 3.09     |        |     |                 |              |          |
| N1-H12   | OW1 | 2.22            | 158.1        | 3.15     |        |     |                 |              |          |
| N1-H13   | N1  | 2.28            | 164.3        | 3.24     |        |     |                 |              |          |



Table S3: Crystal data and structure refinement of  $\text{Ba}(\text{NH}_2\text{SO}_3)_2$  at  $T = 200\text{ K}$ ,  $300\text{ K}$ ,  $400\text{ K}$  and  $500\text{ K}$ .

| $T / \text{K}$                                        | 200                                          | 300                                          | 400                                          | 500                                          |
|-------------------------------------------------------|----------------------------------------------|----------------------------------------------|----------------------------------------------|----------------------------------------------|
| Formula                                               | $\text{H}_4\text{BaN}_2\text{O}_6\text{S}_2$ | $\text{H}_4\text{BaN}_2\text{O}_6\text{S}_2$ | $\text{H}_4\text{BaN}_2\text{O}_6\text{S}_2$ | $\text{H}_4\text{BaN}_2\text{O}_6\text{S}_2$ |
| $M_r / \text{g}\cdot\text{mol}^{-1}$                  | 329.51                                       | 329.51                                       | 329.51                                       | 329.51                                       |
| crystal size / $\text{mm}^3$                          | 0.18x0.02x0.01                               | 0.18x0.02x0.01                               | 0.18x0.02x0.01                               | 0.18x0.02x0.01                               |
| crystal system                                        | orthorhombic                                 | orthorhombic                                 | orthorhombic                                 | orthorhombic                                 |
| space group                                           | $Pna2_1$ $Pna2_1$                            | $Pna2_1$                                     | $Pna2_1$                                     |                                              |
| $a / \text{Å}$                                        | 10.5739(6)                                   | 10.5749(8)                                   | 10.5788(6)                                   | 10.5848(10)                                  |
| $b / \text{Å}$                                        | 13.3639(7)                                   | 13.3927(10)                                  | 13.4398(7)                                   | 13.4915(16)                                  |
| $c / \text{Å}$                                        | 4.8015(3)                                    | 4.8168(4)                                    | 4.8350(3)                                    | 4.8551(6)                                    |
| $V / \text{Å}^3$                                      | 678.49(7)                                    | 682.19(9)                                    | 687.43(7)                                    | 693.33(14)                                   |
| $Z$                                                   | 4                                            | 4                                            | 4                                            | 4                                            |
| $D_{\text{calc}} / \text{g}\cdot\text{cm}^{-3}$       | 3.225                                        | 3.208                                        | 3.184                                        | 3.157                                        |
| $\mu(\text{Mo-K}\alpha) / \text{cm}^{-1}$             | 4.842                                        | 6.421                                        | 6.372                                        | 6.318                                        |
| $F(000) / e$                                          | 462                                          | 616                                          | 616                                          | 616                                          |
| $hkl$ range                                           | [-20,14], [-25,24], $\pm 9$                  | [-20,13], [-25,24], $\pm 9$                  | [-20,13], [-25,24], $\pm 9$                  | [-12,18], [-23,23], $\pm 8$                  |
| $[(\sin\theta)/\lambda]_{\text{max}} / \text{Å}^{-3}$ | 0.96                                         | 0.96                                         | 0.96                                         | 0.88                                         |
| measured reflections                                  | 18546                                        | 18652                                        | 18938                                        | 15615                                        |
| unique reflections                                    | 4956                                         | 4979                                         | 5007                                         | 3975                                         |
| Flack x                                               | 0.056(13)                                    | 0.062(11)                                    | 0.049(14)                                    | 0.055(14)                                    |
| $R_{\text{int}} / R_{\text{sigma}}$                   | 0.074/0.074                                  | 0.067/0.067                                  | 0.084/0.085                                  | 0.76/0.71                                    |
| refined parameters                                    | 113                                          | 113                                          | 113                                          | 113                                          |
| $R_1(F) / wR_2(F^2)$                                  | 0.67/0.75                                    | 0.064/0.070                                  | 0.097/0.089                                  | 0.092/0.071                                  |
| $GoF(F^2)$                                            | 0.99                                         | 0.95                                         | 1.00                                         | 0.98                                         |
| $\Delta\rho_{\text{fin}} / e\cdot\text{Å}^{-3}$       | 1.85/-1.83                                   | 1.55/-1.85                                   | 1.18/-1.44                                   | 1.11/-1.27                                   |
| (max./min.)                                           |                                              |                                              |                                              |                                              |

Table S4: Crystal data and structure refinement of  $S_4N_4$  (10).

|                                                            |                       |
|------------------------------------------------------------|-----------------------|
| Formula                                                    | $S_4N_4$              |
| $M_r$ / $g \cdot mol^{-1}$                                 | 288.55                |
| crystal size / $mm^3$                                      | 0.20x0.05x0.05        |
| crystal system                                             | monoclinic            |
| space group                                                | $P2_1/n$              |
| $a$ / $\text{\AA}$                                         | 8.6933(5)             |
| $b$ / $\text{\AA}$                                         | 7.1572(4)             |
| $c$ / $\text{\AA}$                                         | 8.7826(6)             |
| $\alpha$ / $^\circ$                                        | 90                    |
| $\beta$ / $^\circ$                                         | 92.628(4)             |
| $\gamma$ / $^\circ$                                        | 90                    |
| $V$ / $\text{\AA}^3$                                       | 545.87(6)             |
| $Z$                                                        | 4                     |
| $T$ / K                                                    | 278(2)                |
| $D_{calc}$ / $g \cdot cm^{-3}$                             | 1.682                 |
| $\mu$ (Mo-K $\alpha$ ) / $cm^{-1}$                         | 1.213                 |
| $F(000)$ / e                                               | 276                   |
| $hkl$ range                                                | $\pm 8, [0,7], [0,9]$ |
| $[(\sin\theta)/\lambda]_{max}$ / $\text{\AA}^{-3}$         | 0.52                  |
| measured reflections                                       | 628                   |
| unique reflections                                         | 628                   |
| BASF                                                       | 0.34                  |
| $R_{int}$ / $R_{sigma}$                                    | 0.132/0.073           |
| refined parameters                                         | 74                    |
| $R_1(F)$ / $wR_2(F^2)$                                     | 0.066/0.106           |
| $GoF$ ( $F^2$ )                                            | 1.13                  |
| $\Delta\rho_{fin}$ (max./min.) / $e \cdot \text{\AA}^{-3}$ | 0.47/-0.37            |

Table S5: Wavenumbers  $\nu / \text{cm}^{-1}$  of all peaks observed via FT-IR respectively Raman spectroscopy as well as assigned modes with major contributions for the vibrations of  $\text{Mg}(\text{NH}_2\text{SO}_3)_2 \cdot 4\text{H}_2\text{O}$  (1),  $\text{Mg}(\text{NH}_2\text{SO}_3)_2 \cdot 3\text{H}_2\text{O}$  (2),  $\text{Ca}(\text{NH}_2\text{SO}_3)_2 \cdot 4\text{H}_2\text{O}$  (3),  $\text{Ca}(\text{NH}_2\text{SO}_3)_2 \cdot \text{H}_2\text{O}$  (4),  $\text{Sr}(\text{NH}_2\text{SO}_3)_2 \cdot \text{H}_2\text{O}$  (6),  $\beta\text{-Sr}(\text{NH}_2\text{SO}_3)_2$  (7),  $\alpha\text{-Sr}(\text{NH}_2\text{SO}_3)_2$  (8) and  $\text{Ba}(\text{NH}_2\text{SO}_3)_2$  (9).

| mode assignment               | FT-IR | (1)  | (2)  | (3)  | (4)  | (6)  | (7)  | (9)  | Raman (4) | (7)  | (9)  |
|-------------------------------|-------|------|------|------|------|------|------|------|-----------|------|------|
| $\text{H}_2\text{O}$ as. str. |       |      | 3487 | 3570 | 3590 | 3498 |      |      | 3580      |      |      |
| $\text{H}_2\text{O}$ s. str.  |       | 3404 | 3390 | 3500 | 3521 | 3464 |      |      | 3526      |      |      |
| $\text{NH}_2$ as. str.        |       | 3293 | 3305 | 3309 | 3340 | 3373 | 3367 | 3348 | 3340      | 3369 | 3350 |
|                               |       |      | 3282 |      |      | 3356 | 3342 |      |           | 3345 |      |
| $\text{NH}_2$ s. str.         |       | 3226 | 3240 | 3248 | 3251 | 3286 | 3251 | 3277 | 3241      | 3254 | 3277 |
|                               |       |      | 3074 |      |      | 3267 | 3188 |      |           | 3182 | 3277 |
|                               |       |      |      |      |      |      | 3099 |      | 3098      |      |      |
| $\text{H}_2\text{O}$ bend.    |       | 1665 | 1645 | 1620 | 1620 | 1633 |      |      | 1614      |      |      |
|                               |       |      |      | 1614 |      |      |      |      |           |      |      |
| $\text{NH}_2$ bend.           |       | 1535 | 1574 | 1554 | 1572 | 1550 | 1568 | 1558 |           | 1570 | 1556 |
|                               |       |      | 1531 |      |      |      | 1441 | 1470 |           |      |      |
|                               |       |      | 1294 |      |      |      |      |      |           |      |      |
| $\text{SO}_3$ as. str.        |       | 1211 | 1226 | 1255 | 1245 | 1257 | 1252 | 1250 | 1288      | 1245 |      |
| $\text{SO}_3$ s. str.         |       | 1198 | 1198 | 1232 | 1209 | 1236 | 1230 | 1200 | 1203      | 1228 | 1207 |
|                               |       |      | 1209 | 1226 |      |      |      |      |           |      |      |
| $\text{NH}_2$ as. rock.       |       | 1140 | 1157 | 1161 | 1184 | 1163 | 1187 | 1160 |           | 1139 | 1168 |
|                               |       |      | 1142 | 1130 |      | 1126 | 1141 | 1108 |           |      | 1115 |
| $\text{SO}_3$ s. str.         |       | 1058 | 1182 | 1049 | 1107 | 1101 | 1080 | 1059 | 1088      | 1081 | 1060 |
|                               |       |      | 1068 |      | 1072 | 1053 | 1049 | 1045 |           | 1056 | 1053 |
| $\text{NH}_2$ s. wag.         |       | 956  | 954  | 887  | 904  | 910  | 916  | 916  | 920       | 916  | 920  |
|                               |       |      |      |      |      |      | 883  | 885  |           | 883  |      |
|                               |       |      |      |      |      |      |      | 856  |           |      |      |
| $\text{S-N}$ str.             |       | 792  | 814  | 800  | 789  | 785  | 725  | 743  | 777       |      | 763  |
|                               |       | 700  | 706  | 663  | 750  | 741  | 705  |      |           |      |      |
|                               |       |      |      |      |      | 650  |      |      |           |      |      |
| $\text{SO}_3$ as. def.        |       | 576  | 575  | 584  | 600  | 606  | 596  | 594  | 590       | 595  | 595  |
|                               |       | 552  | 550  | 540  | 561  | 584  | 577  | 575  | 576       | 567  | 576  |
|                               |       |      |      |      |      | 557  | 566  | 552  | 567       | 567  | 557  |
|                               |       |      |      |      |      | 546  | 550  |      | 556       | 551  |      |
| $\text{SO}_3$ s. def.         |       | 490  | 480  |      | 486  | 457  | 469  |      | 473       | 468  |      |
|                               |       | 445  | 445  |      | 446  | 434  | 413  | 430  |           | 412  | 428  |
| $\text{SO}_3$ as. rock.       |       | 410  | 416  |      |      | 405  |      | 405  | 396       |      | 407  |
| $\text{SO}_3$ s. rock.        |       | 402  |      |      |      |      |      |      | 356       | 397  | 391  |
| $\text{S-N}$ tors.            |       |      |      |      |      |      |      |      | 300       | 312  |      |
| ext.                          |       |      |      |      |      |      |      |      | 176       | 173  | 153  |



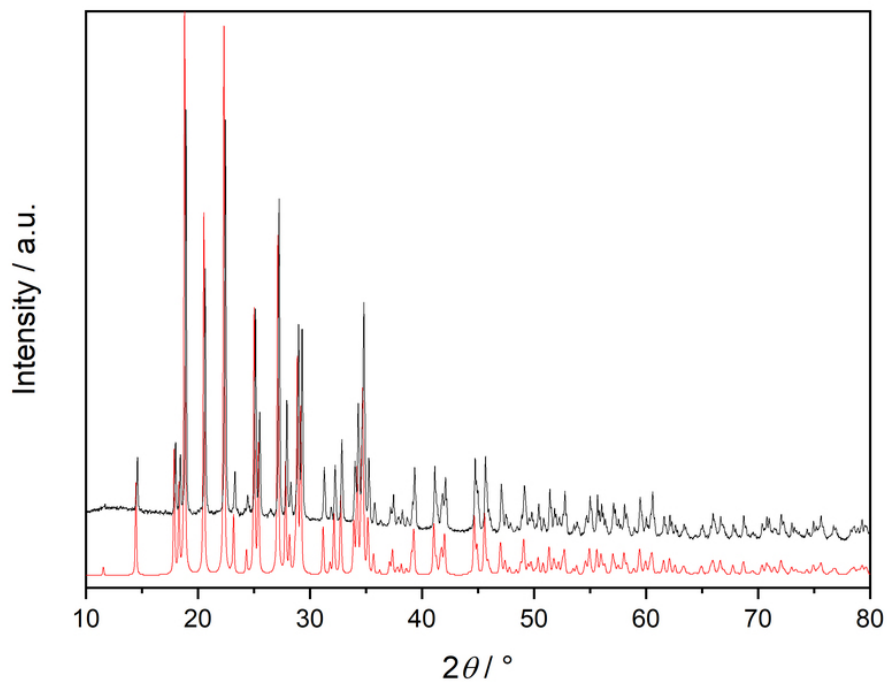

Figure S35: X-ray powder diffraction pattern of  $\text{Mg}(\text{NH}_2\text{SO}_3)_2 \cdot 4\text{H}_2\text{O}$  shown in black compared with a calculated pattern based on single-crystal data shown in red.

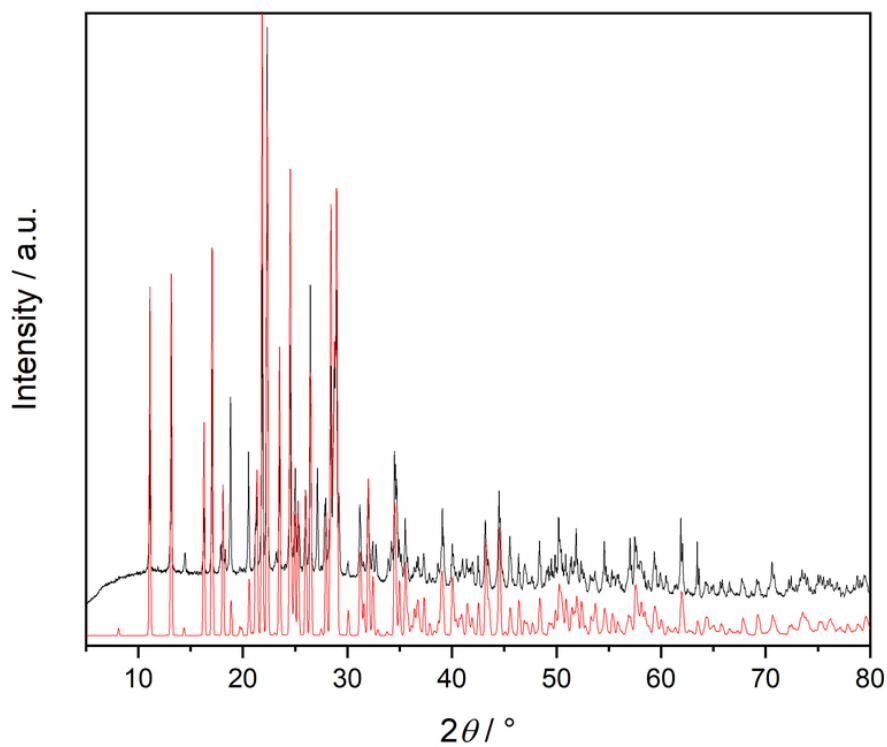

Figure S36: X-ray powder diffraction pattern of  $\text{Mg}(\text{NH}_2\text{SO}_3)_2 \cdot 3\text{H}_2\text{O}$  shown in black compared with a calculated pattern based on single-crystal data shown in red.

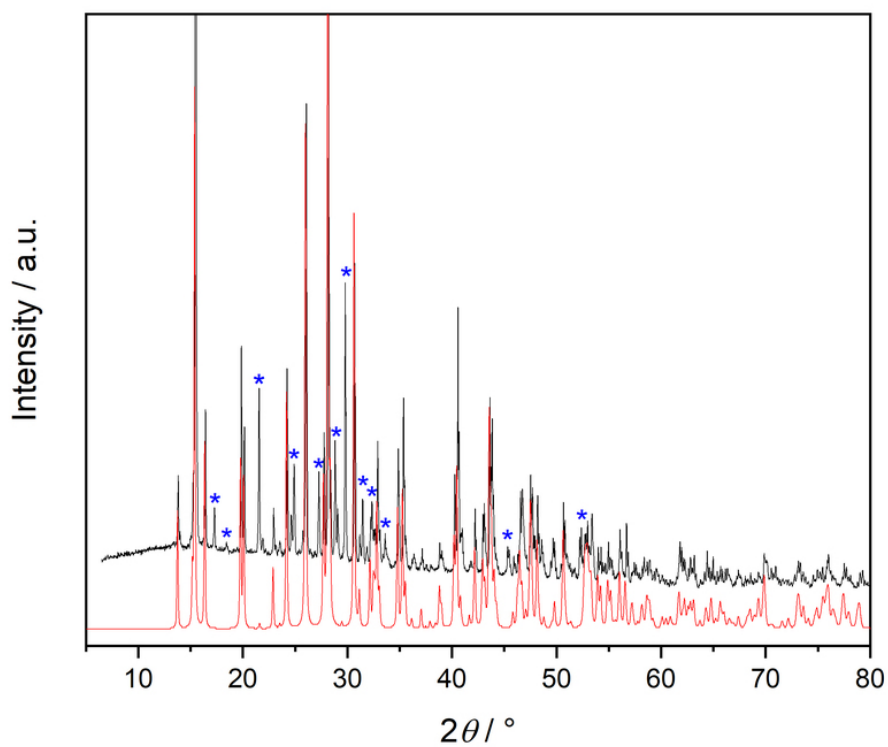

Figure S37: X-ray powder diffraction pattern of  $\text{Ca}(\text{NH}_2\text{SO}_3)_2 \cdot 4\text{H}_2\text{O}$  shown in black compared with a calculated pattern based on single-crystal data shown in red. Reflections belonging to  $\text{Ca}(\text{NH}_2\text{SO}_3)_2 \cdot \text{H}_2\text{O}$  are marked with \*.

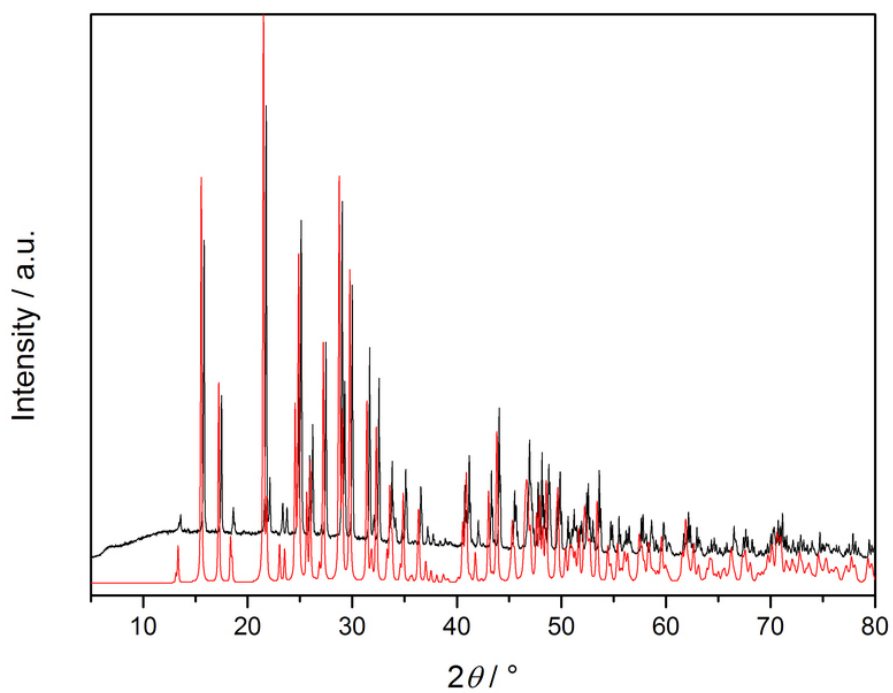

Figure S38: X-ray powder diffraction pattern of  $\text{Ca}(\text{NH}_2\text{SO}_3)_2 \cdot \text{H}_2\text{O}$  shown in black compared with a calculated pattern based on single-crystal data shown in red.

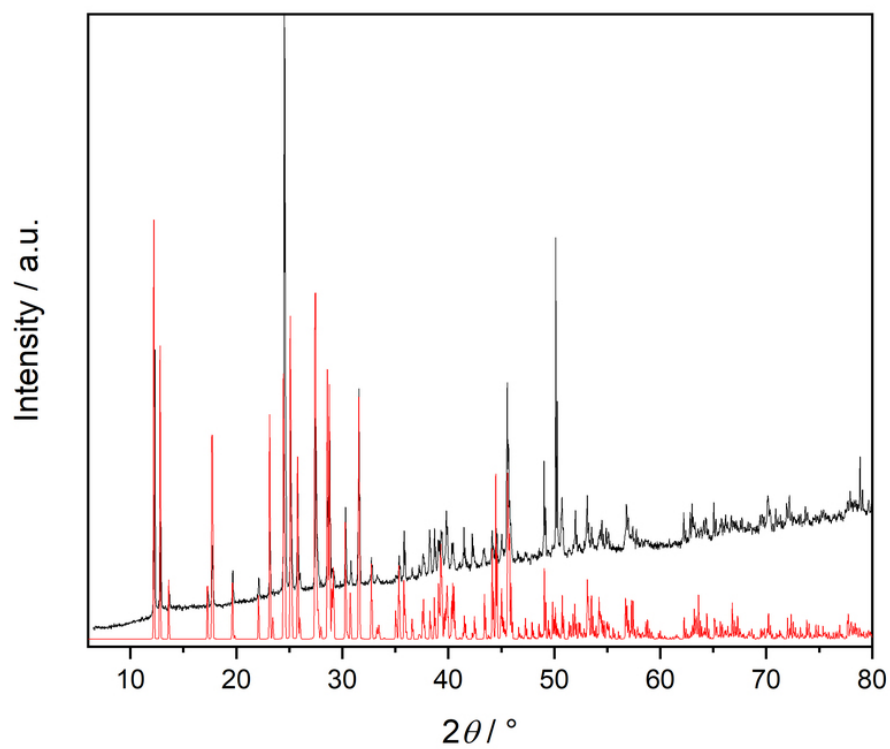

Figure S39: X-ray powder diffraction pattern of  $\text{Sr}(\text{NH}_2\text{SO}_3)_2 \cdot \text{H}_2\text{O}$  shown in black compared with a calculated pattern based on single-crystal data shown in red.

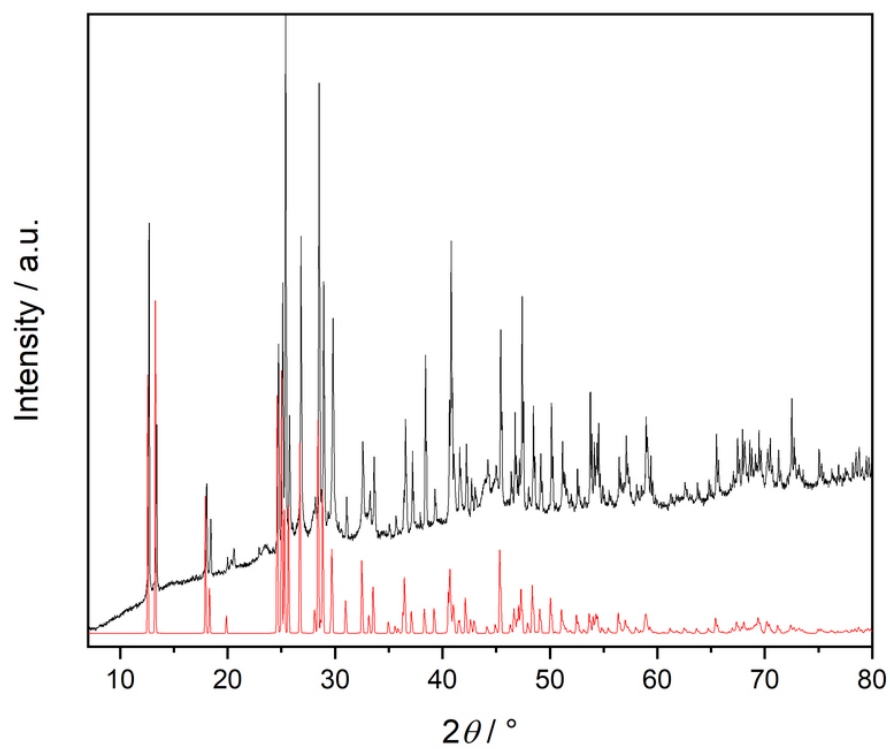

Figure S40: X-ray powder diffraction pattern of  $\beta\text{-Sr}(\text{NH}_2\text{SO}_3)_2$  shown in black compared with a calculated pattern based on single-crystal data shown in red.

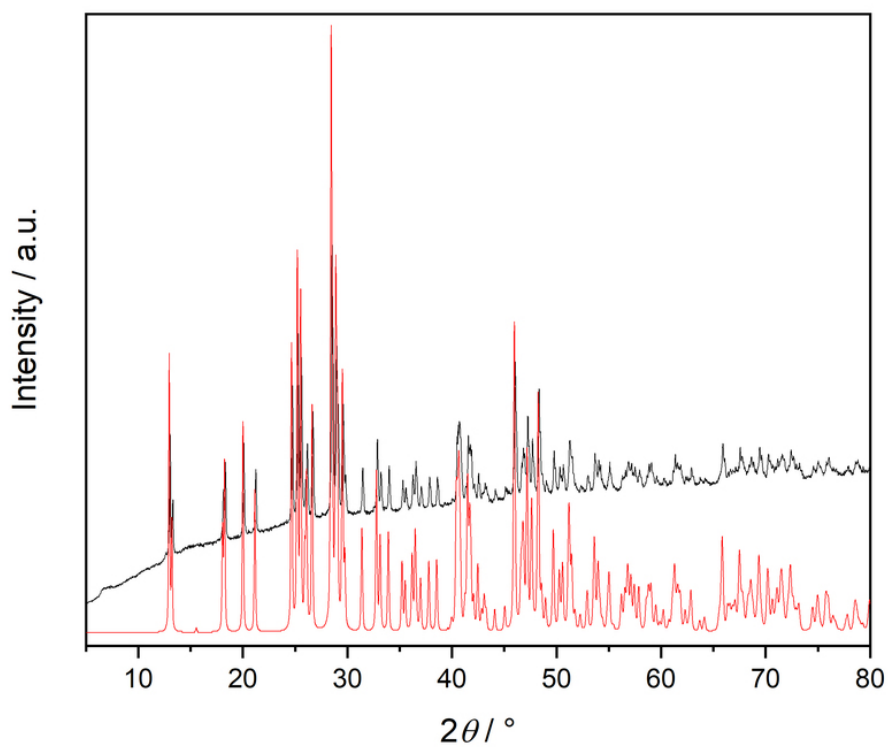

Figure S41: X-ray powder diffraction pattern of  $\alpha$ - $\text{Sr}(\text{NH}_2\text{SO}_3)_2$  shown in black compared with a calculated pattern based on single-crystal data shown in red.

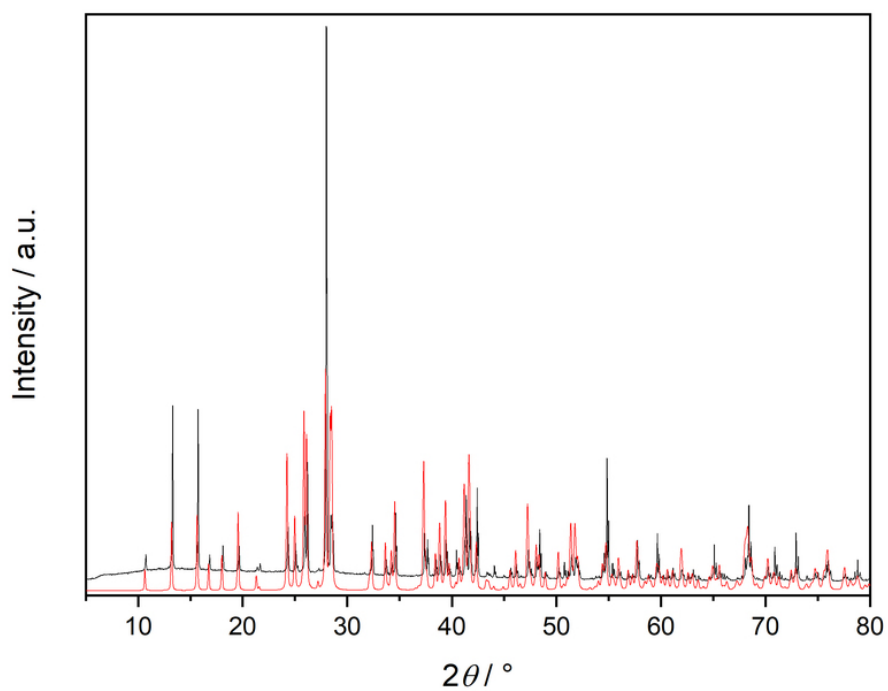

Figure S42: X-ray powder diffraction pattern of  $\text{Ba}(\text{NH}_2\text{SO}_3)_2$  shown in black compared with a calculated pattern based on single-crystal data shown in red.



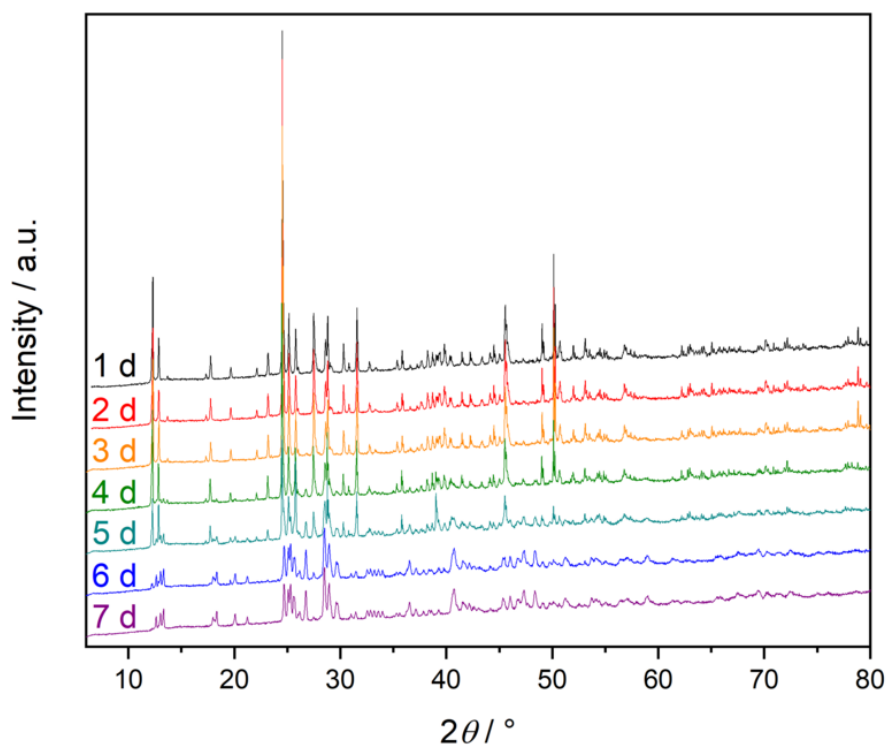

Figure S43: X-ray powder diffraction pattern of a finely ground sample of  $\text{Sr}(\text{NH}_2\text{SO}_3)_2 \cdot \text{H}_2\text{O}$  aged over the course of six days on air.

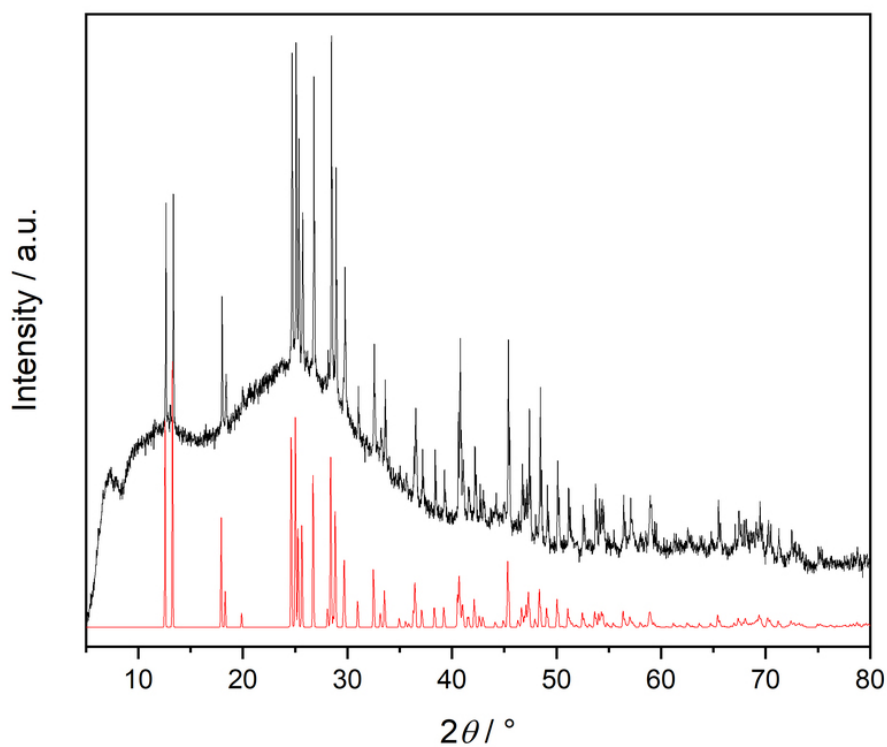

Figure S44: X-ray powder diffraction pattern of a sample of  $\beta\text{-Sr}(\text{NH}_2\text{SO}_3)_2$  heated to  $220^\circ\text{C}$  shown in black compared with a calculated pattern based on single-crystal data shown in red.

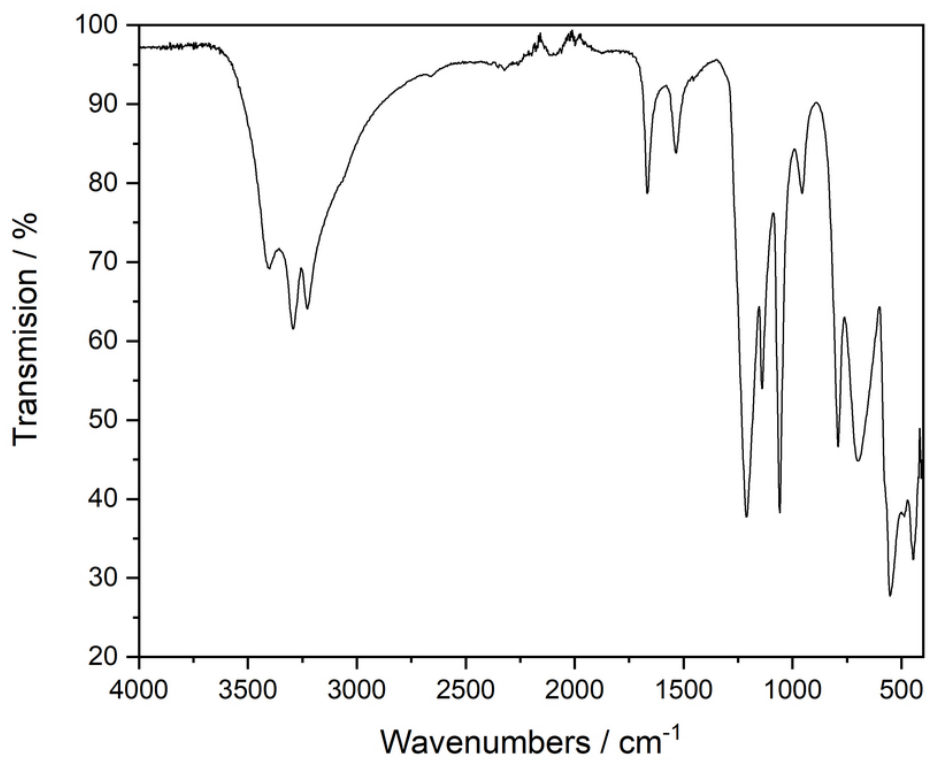

Figure S45: FT-IR spectrum of  $\text{Mg}(\text{NH}_2\text{SO}_3)_2 \cdot 4\text{H}_2\text{O}$ .

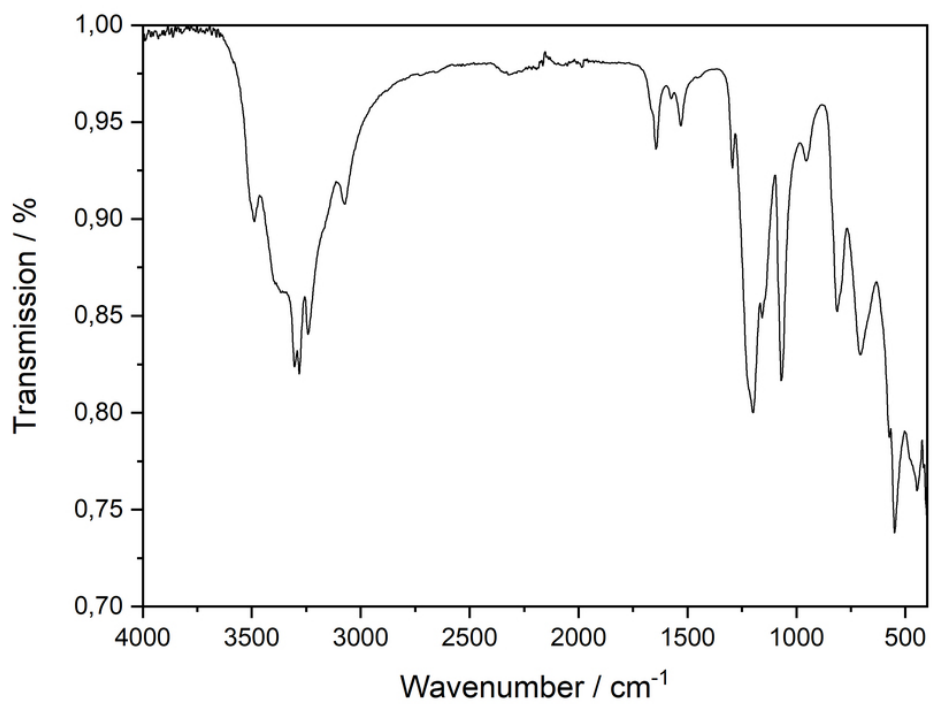

Figure S46: FT-IR spectrum of  $\text{Mg}(\text{NH}_2\text{SO}_3)_2 \cdot 3\text{H}_2\text{O}$ .

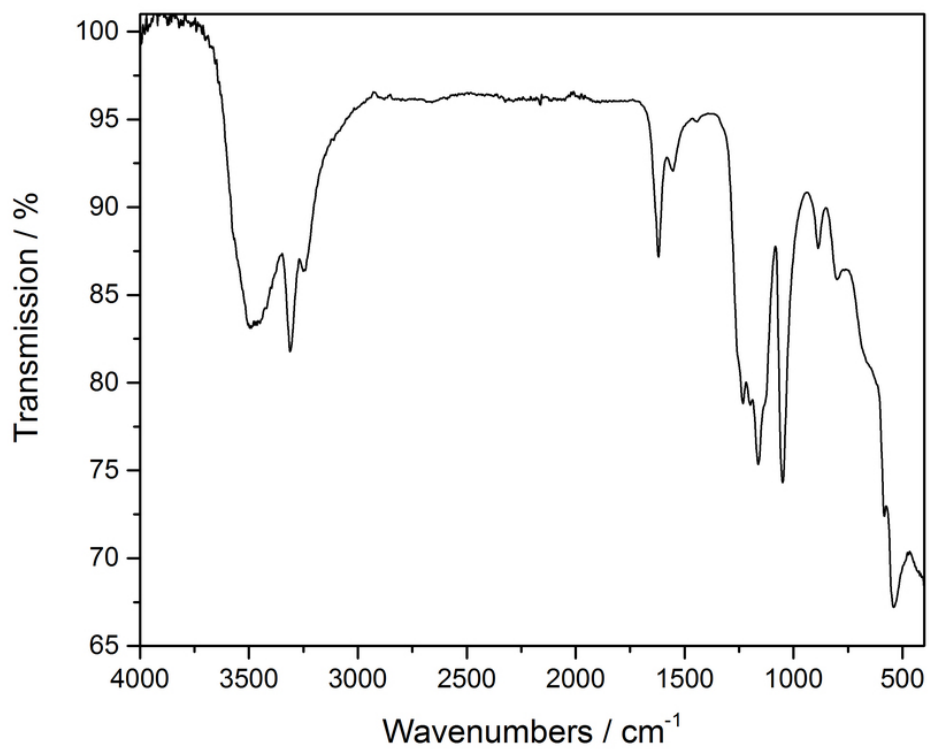

Figure S47: FT-IR spectrum of  $\text{Ca}(\text{NH}_2\text{SO}_3)_2 \cdot 4\text{H}_2\text{O}$ .

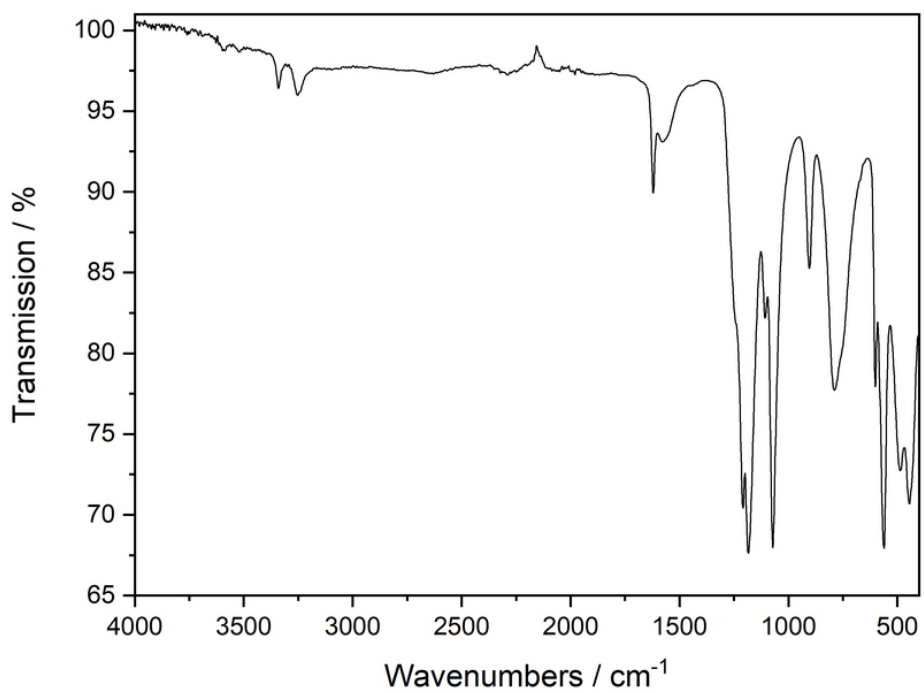

Figure S48: FT-IR spectrum of  $\text{Ca}(\text{NH}_2\text{SO}_3)_2 \cdot \text{H}_2\text{O}$ .

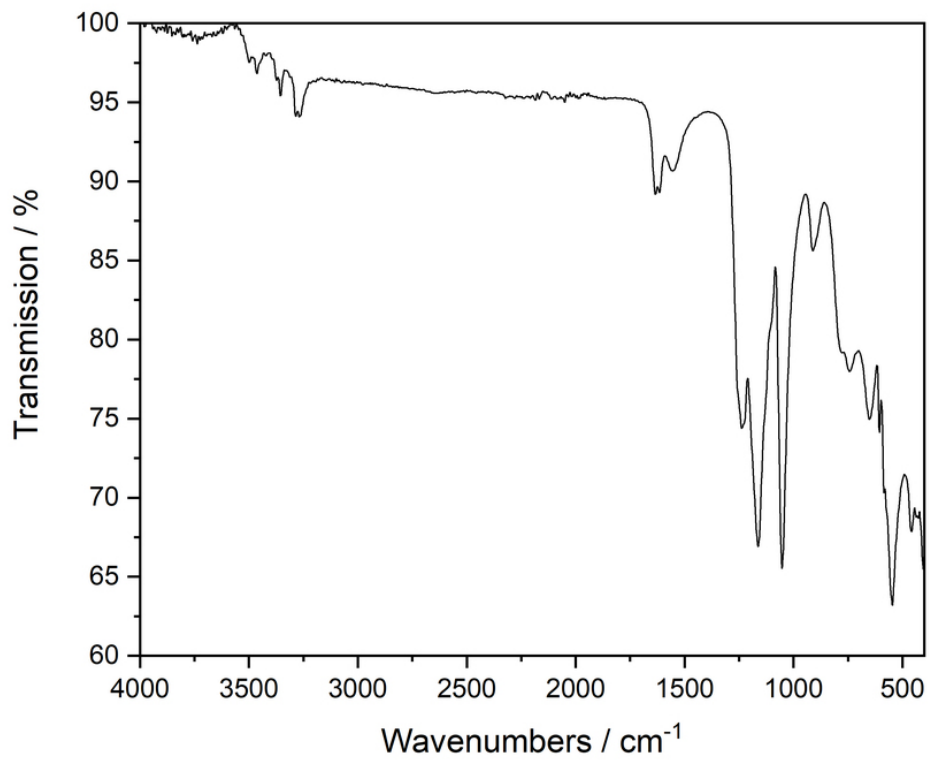

Figure S49: FT-IR spectrum of Sr(NH<sub>2</sub>SO<sub>3</sub>)<sub>2</sub> · H<sub>2</sub>O.

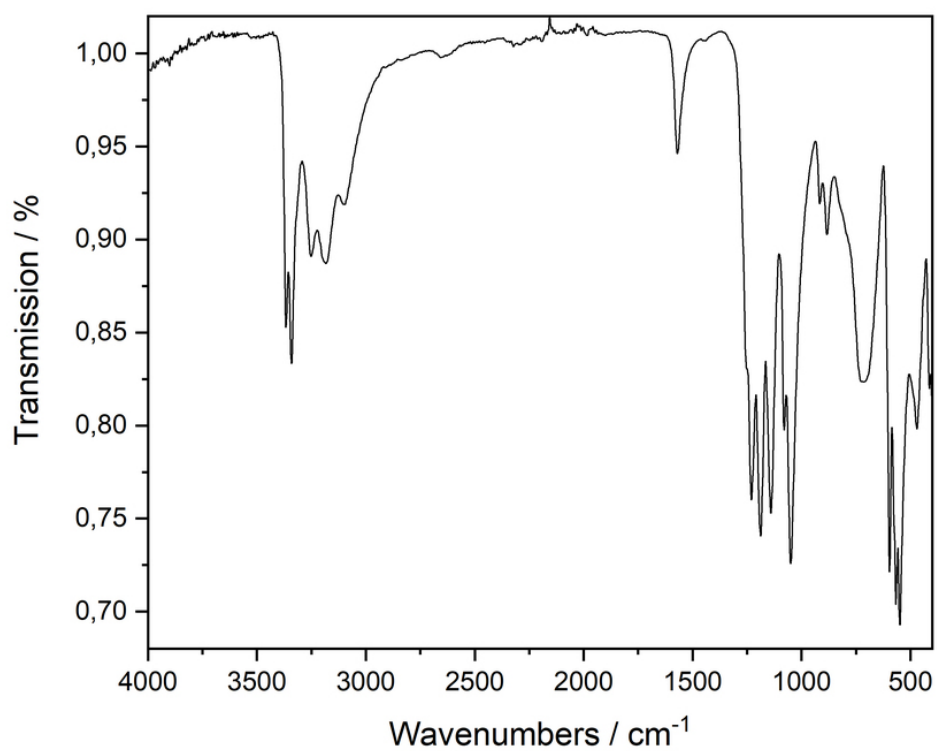

Figure S50: FT-IR spectrum of β-Sr(NH<sub>2</sub>SO<sub>3</sub>)<sub>2</sub>.

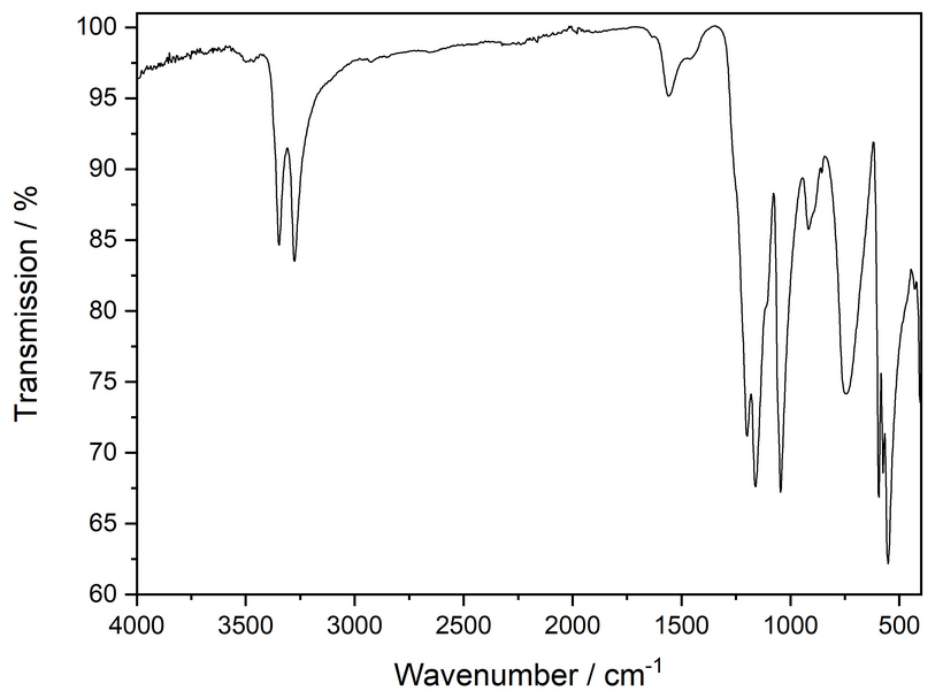

Figure S51: FT-IR spectrum of  $\text{Ba}(\text{NH}_2\text{SO}_3)_2$ .

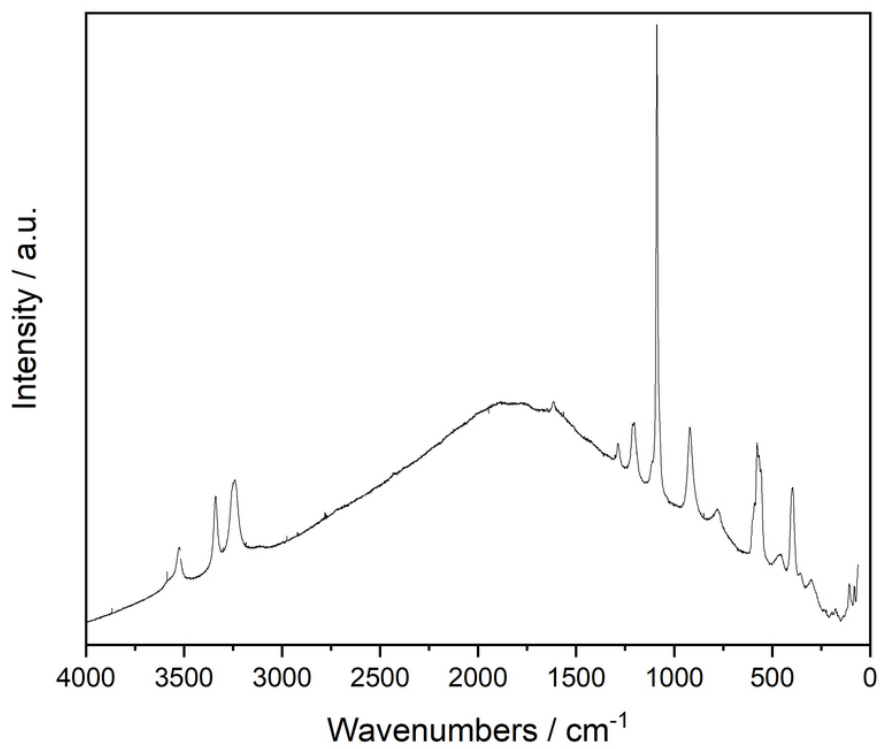

Figure S52: Raman spectrum of  $\text{Ca}(\text{NH}_2\text{SO}_3)_2 \cdot \text{H}_2\text{O}$ .

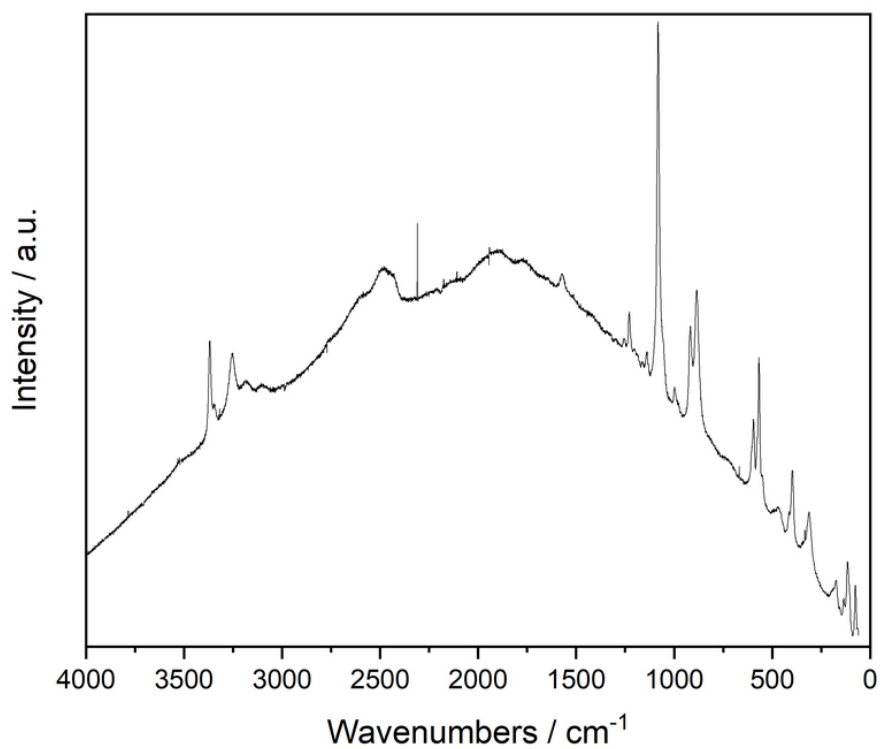

Figure S53: Raman spectrum of  $\text{Sr}(\text{NH}_2\text{SO}_3)_2 \cdot \text{H}_2\text{O}$ .

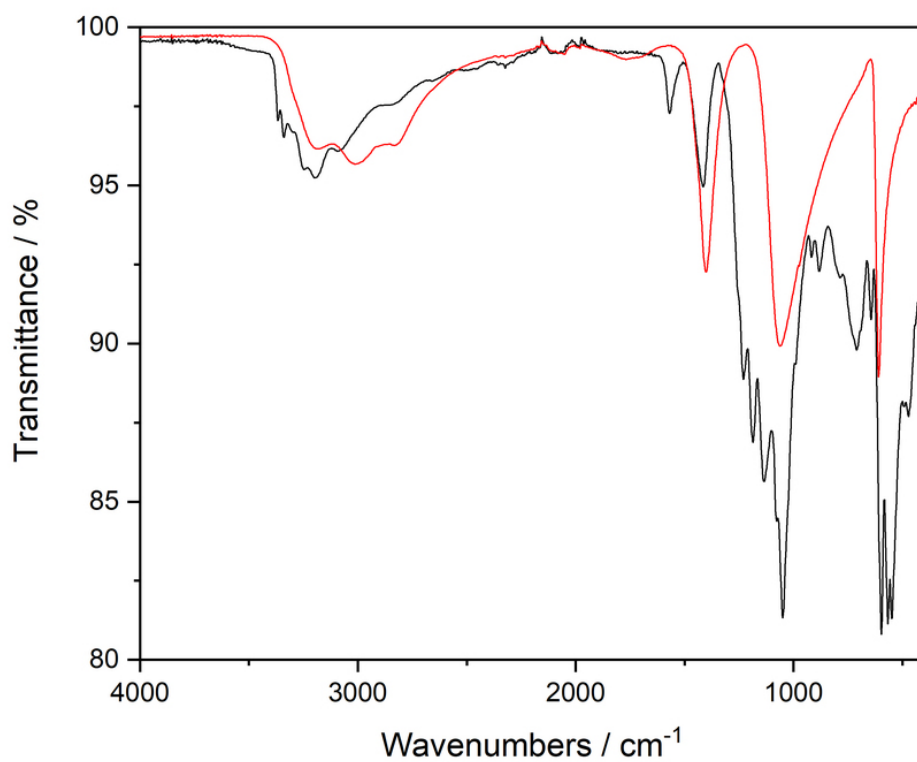

Figure S54: FT-IR spectrum of a sample of  $\beta\text{-Sr}(\text{NH}_2\text{SO}_3)_2$  heated to 220 °C (black line) compared with a FT-IR spectrum of  $(\text{NH}_4)_2\text{SO}_4$  (red line).

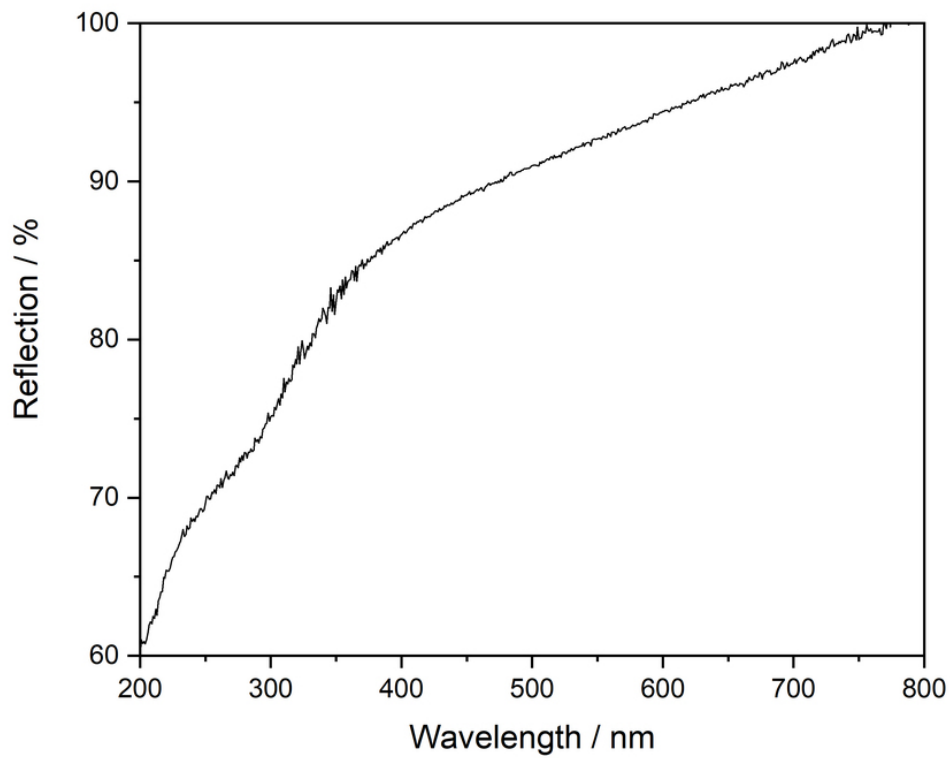

Figure S55: UV-Vis spectrum of  $\text{Mg}(\text{NH}_2\text{SO}_3)_2 \cdot 3\text{H}_2\text{O}$ .

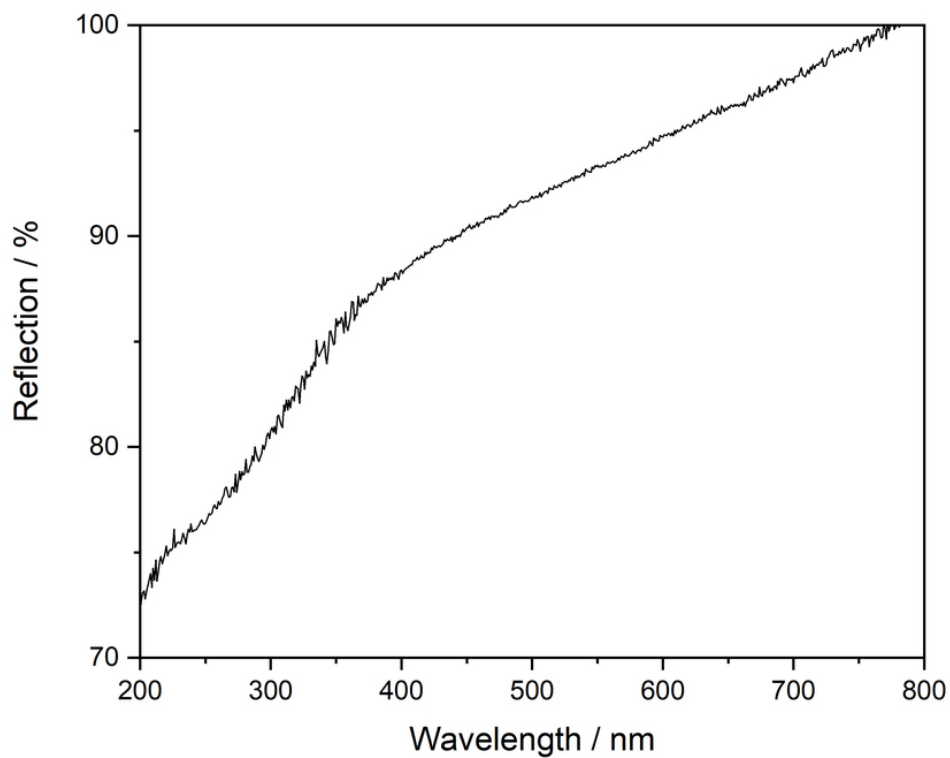

Figure S56: UV-Vis spectrum of  $\text{Ca}(\text{NH}_2\text{SO}_3)_2 \cdot \text{H}_2\text{O}$ .

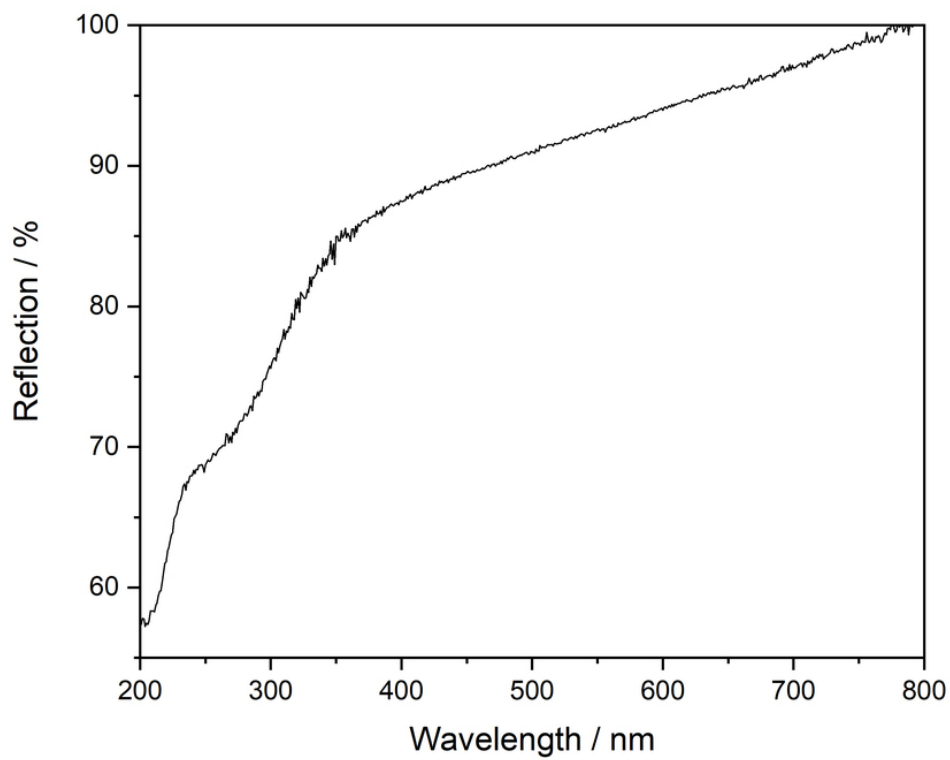

Figure S57: UV-Vis spectrum of  $\text{Sr}(\text{NH}_2\text{SO}_3)_2 \cdot \text{H}_2\text{O}$ .

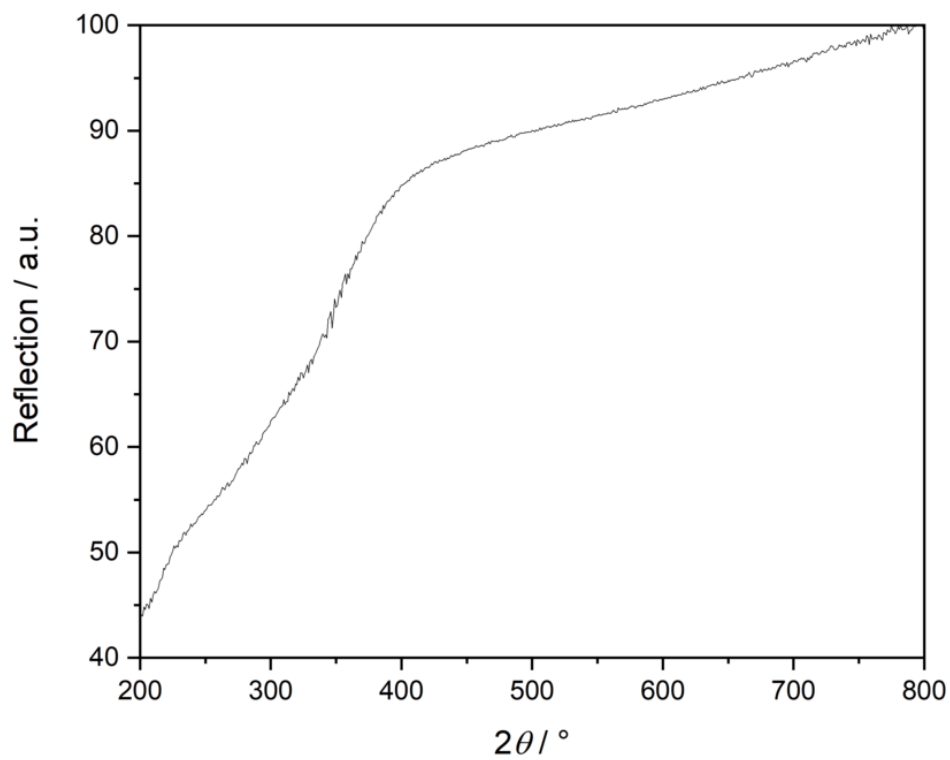

Figure S58: UV-Vis spectrum of  $\beta\text{-Sr}(\text{NH}_2\text{SO}_3)_2$ .



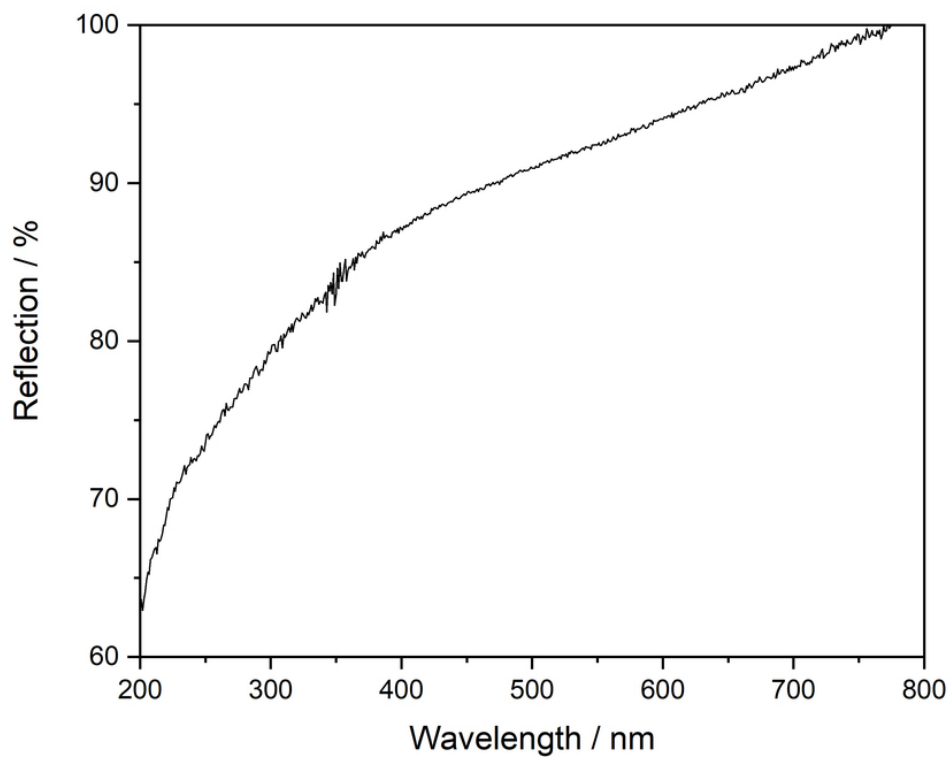

Figure S59: UV-Vis spectrum of Ba(NH<sub>2</sub>SO<sub>3</sub>)<sub>2</sub>.

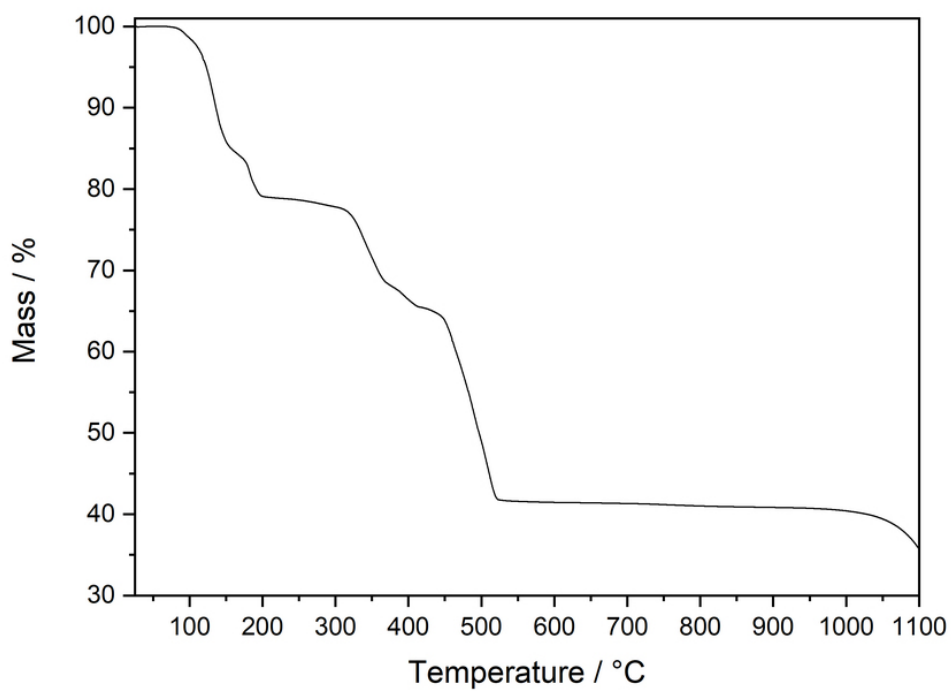

Figure S60: TG curve of Mg(NH<sub>2</sub>SO<sub>3</sub>)<sub>2</sub> · 4H<sub>2</sub>O.

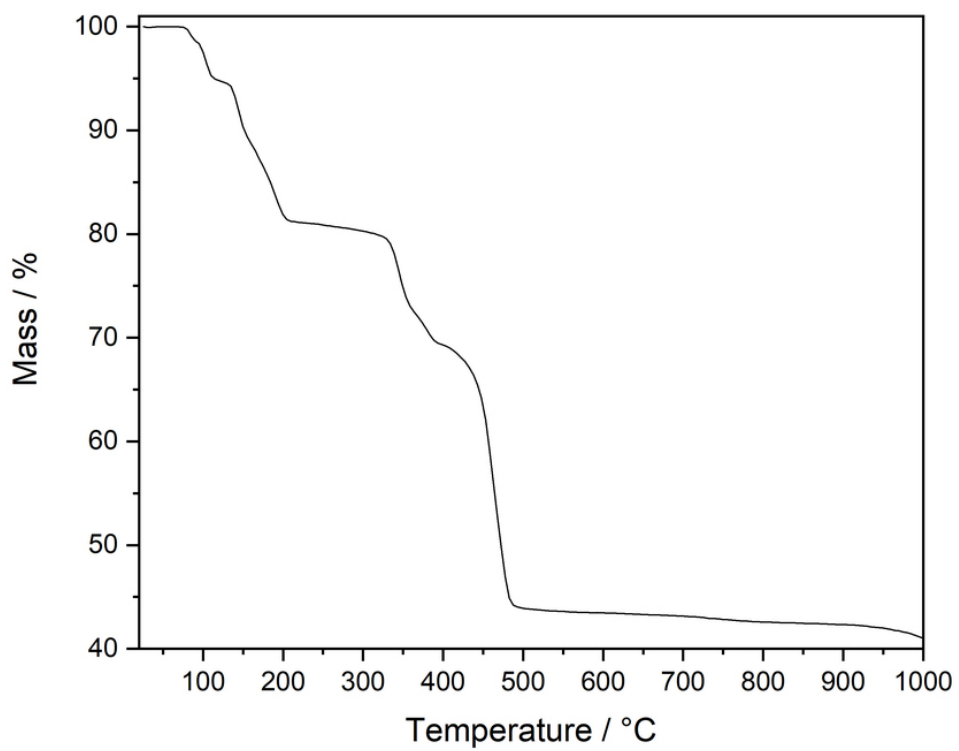

Figure S61: TG curve of  $\text{Mg}(\text{NH}_2\text{SO}_3)_2 \cdot 3\text{H}_2\text{O}$ .

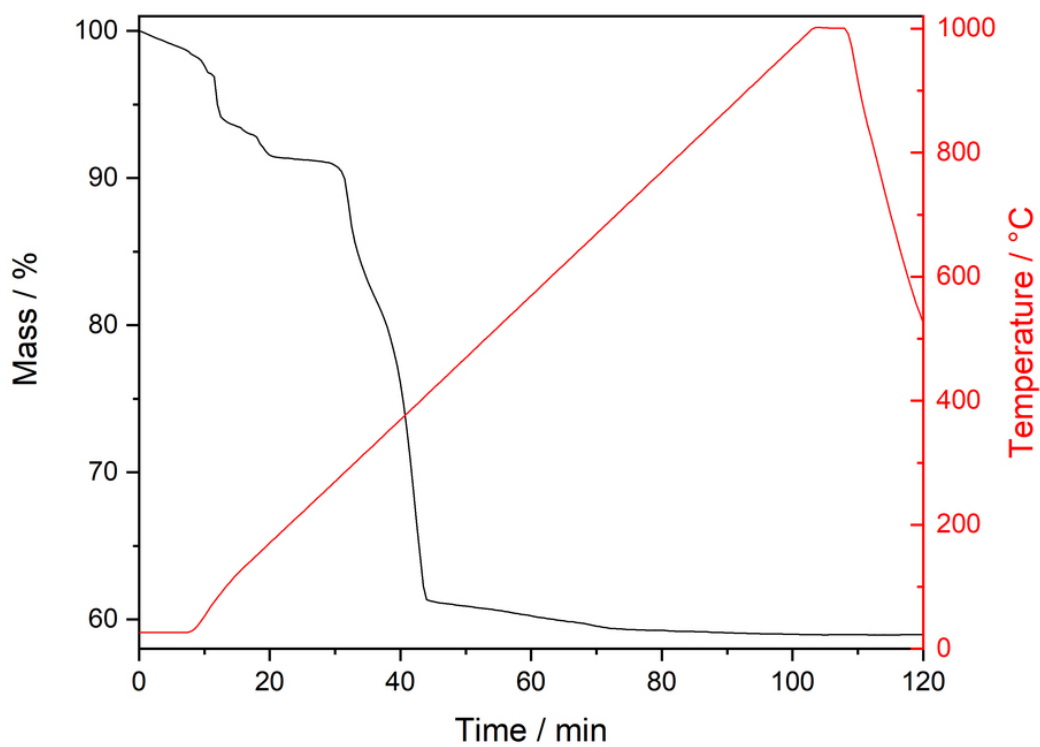

Figure S62: TG curve of  $\text{Ca}(\text{NH}_2\text{SO}_3)_2 \cdot 4\text{H}_2\text{O}$ .

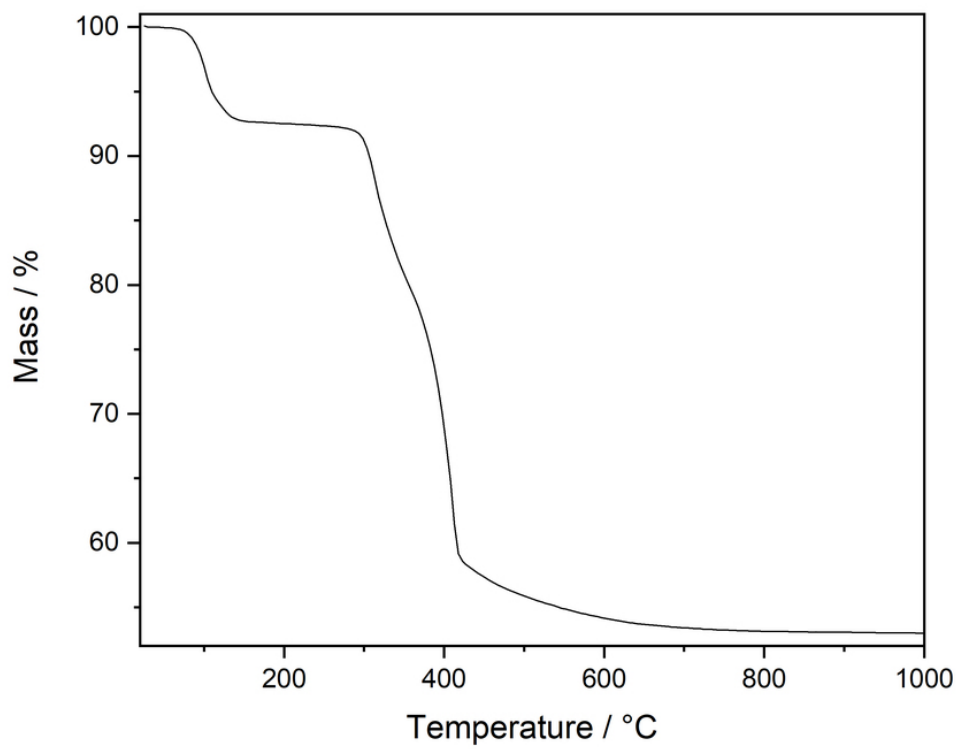

Figure S63: TG curve of  $\text{Ca}(\text{NH}_2\text{SO}_3)_2 \cdot \text{H}_2\text{O}$ .

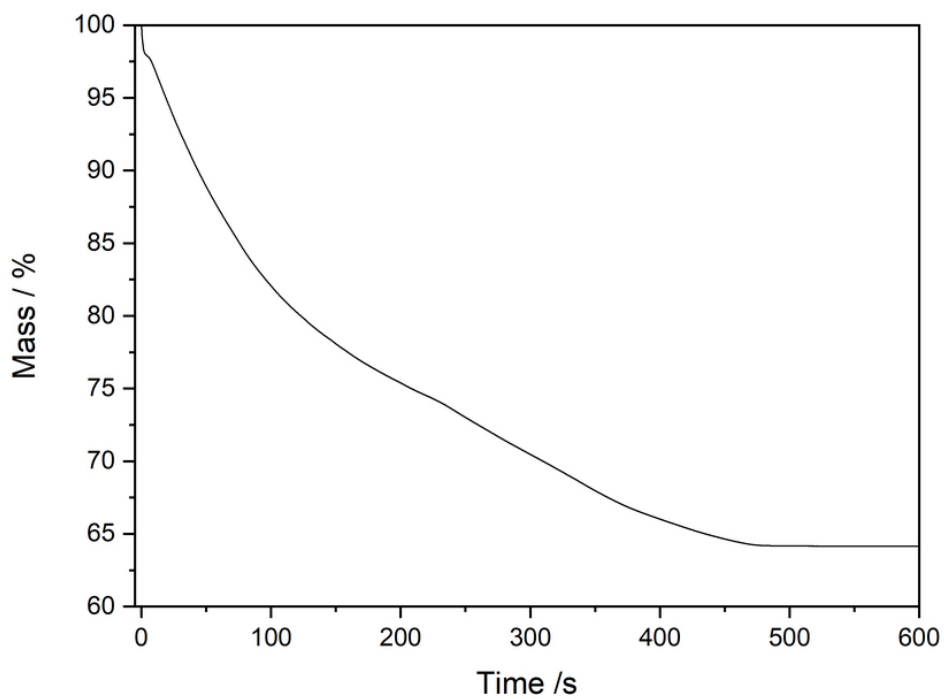

Figure S64: Room temperature isothermal thermogram of a single-crystal of  $\text{Sr}(\text{NH}_2\text{SO}_3)_2 \cdot 4\text{H}_2\text{O}$ .

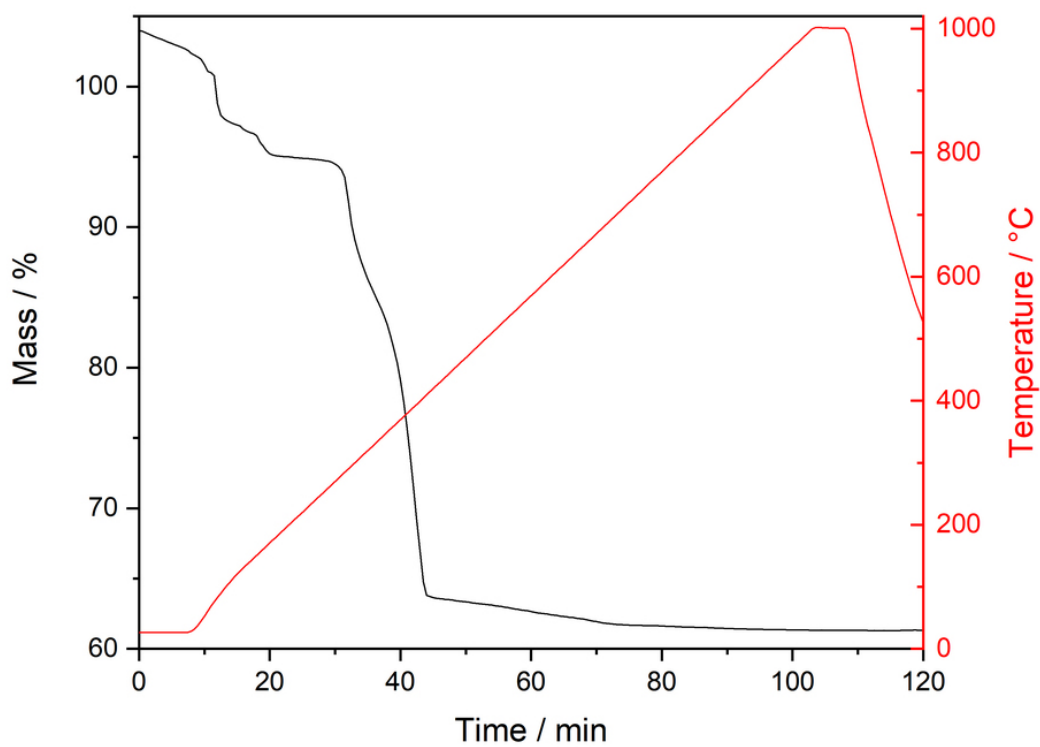

Figure S65: TG curve of  $\text{Sr}(\text{NH}_2\text{SO}_3)_2 \cdot \text{H}_2\text{O}$ .

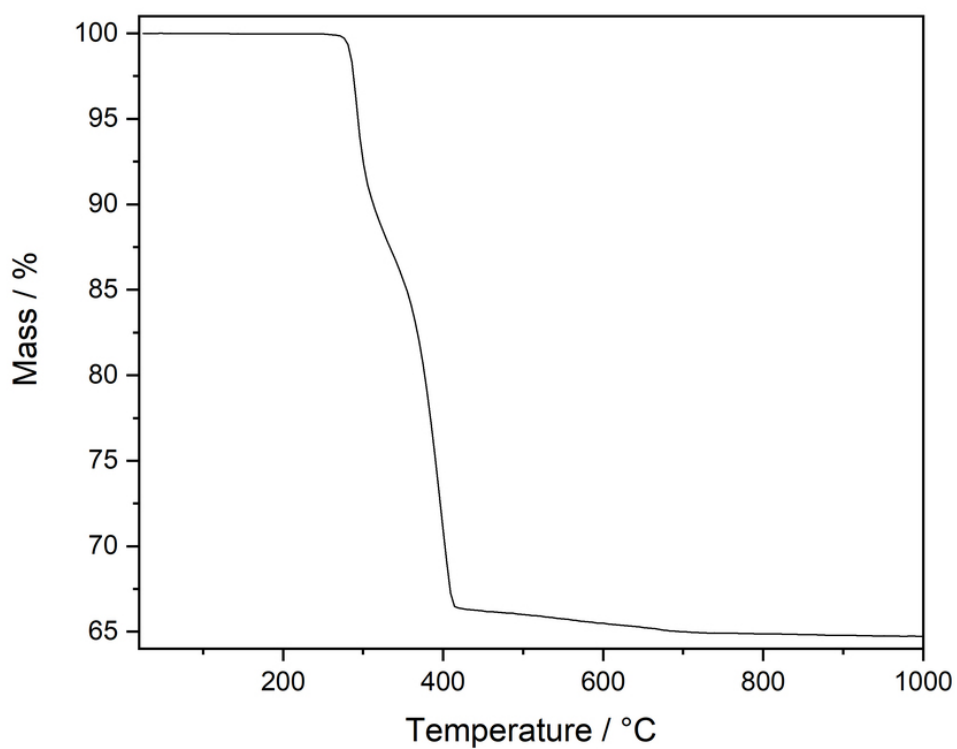

Figure S66: TG curve of  $\text{Sr}(\text{NH}_2\text{SO}_3)_2$ .

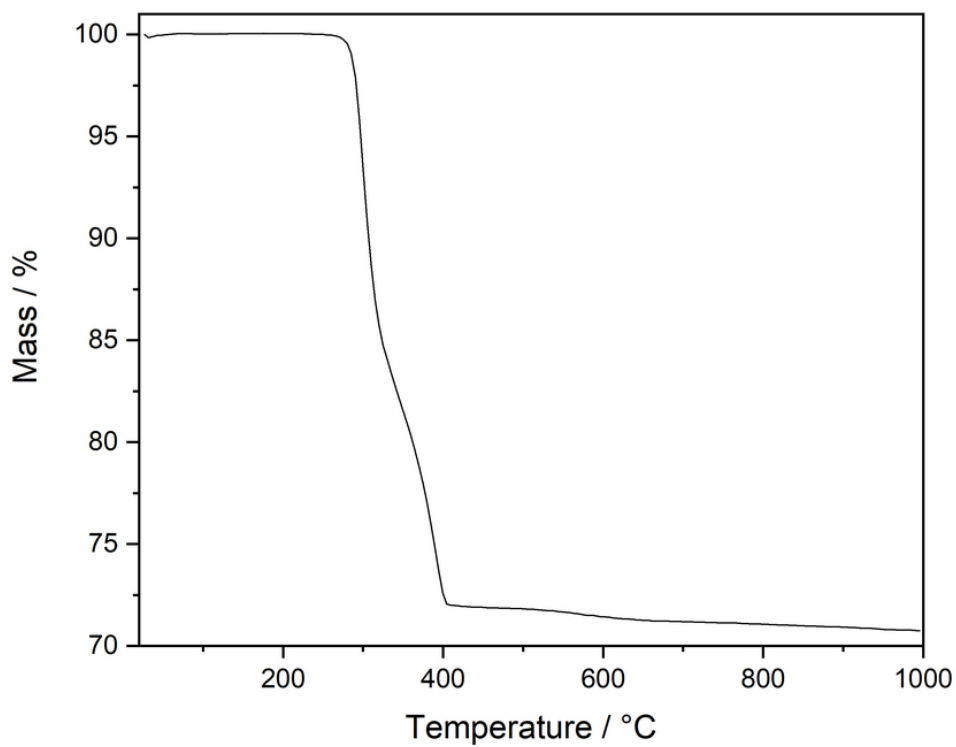

Figure S67: TG curve of Ba(NH<sub>2</sub>SO<sub>3</sub>)<sub>2</sub>.

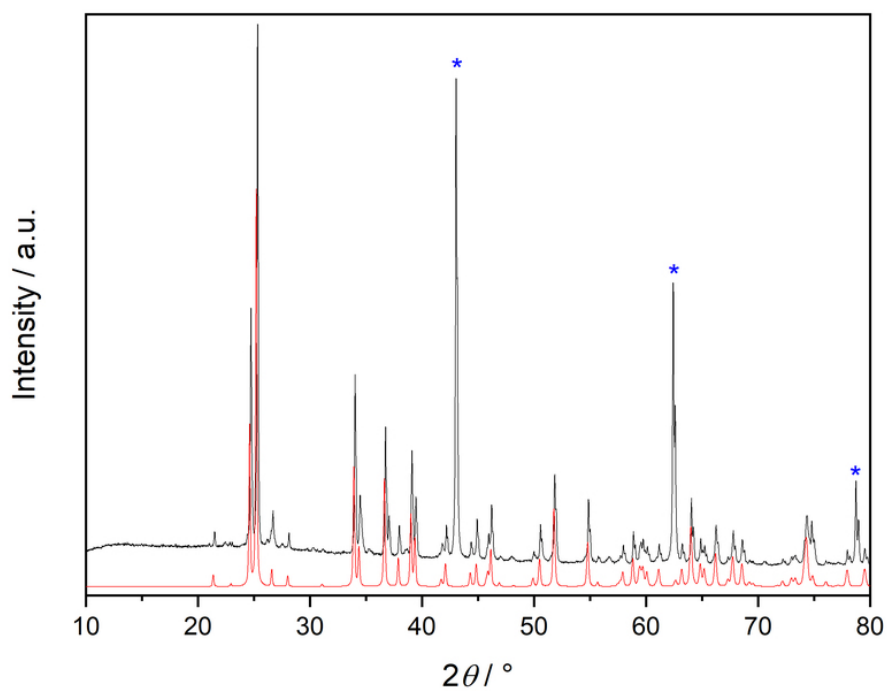

Figure S68: X-ray powder diffraction pattern of the pyrolysis residue of Mg(NH<sub>2</sub>SO<sub>3</sub>)<sub>2</sub> · 4 H<sub>2</sub>O after TGA shown in black compared with a calculated pattern of β-MgSO<sub>4</sub> based on single-crystal data[3] shown in red. Reflections belonging to α-MgSO<sub>4</sub>[4] are marked with a blue asterisk.

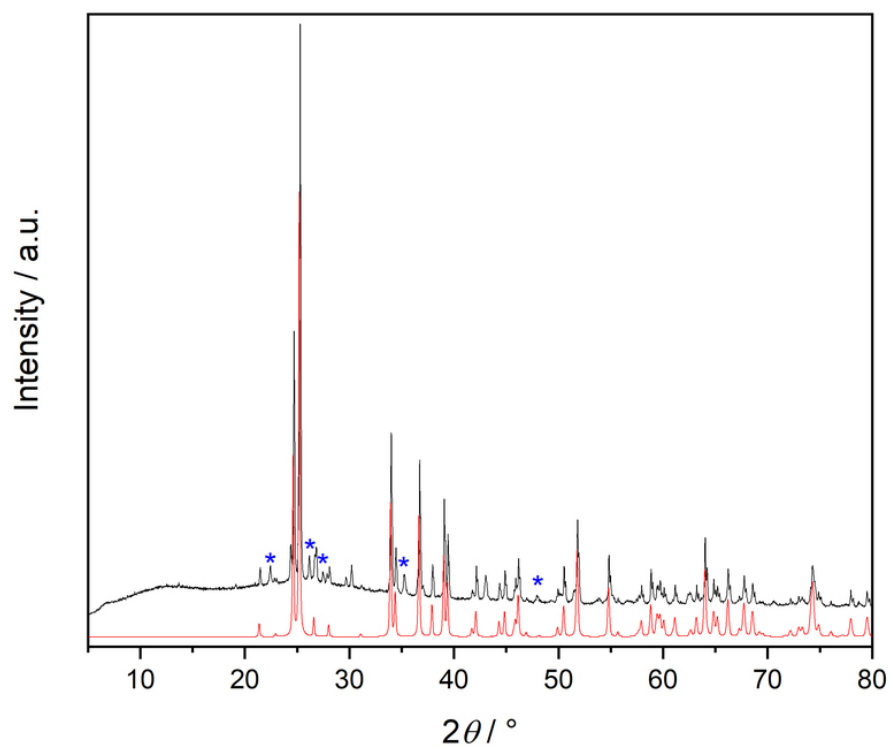

Figure S69: X-ray powder diffraction pattern of the pyrolysis residue of  $\text{Mg}(\text{NH}_2\text{SO}_3)_2 \cdot 3\text{H}_2\text{O}$  after TGA shown in black compared with a calculated pattern of  $\beta\text{-MgSO}_4$  based on single-crystal data[3] shown in red. Reflections belonging to  $\alpha\text{-MgSO}_4$ [4] are marked with a blue asterisk.

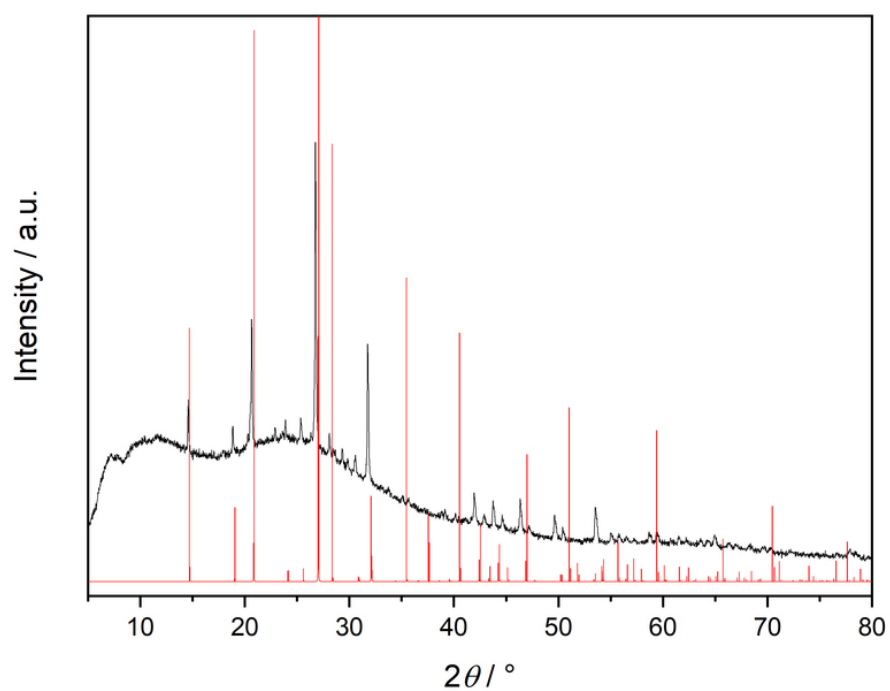

Figure S70: X-ray powder diffraction pattern of the decomposition product of  $\text{Ca}(\text{NH}_2\text{SO}_3)_2 \cdot 4\text{H}_2\text{O}$  heated to  $300\text{ }^\circ\text{C}$  shown in black compared with a calculated pattern of synthetic calciolangbeinite  $\text{K}_2\text{Ca}_2(\text{SO}_4)_3$  based on single-crystal data[5] shown in red.

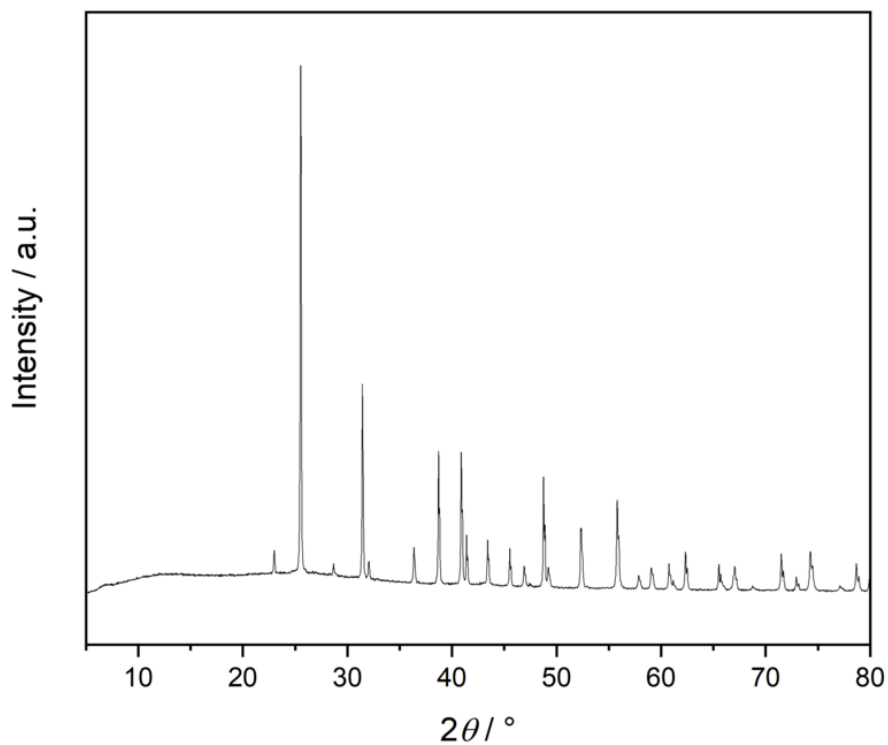

Figure S71: X-ray powder diffraction pattern of the decomposition product of  $\text{Ca}(\text{NH}_2\text{SO}_3)_2 \cdot \text{H}_2\text{O}$  after TGA shown in black compared with a calculated pattern of synthetic anhydrite  $\text{CaSO}_4$  based on single-crystal data[6] shown in red.

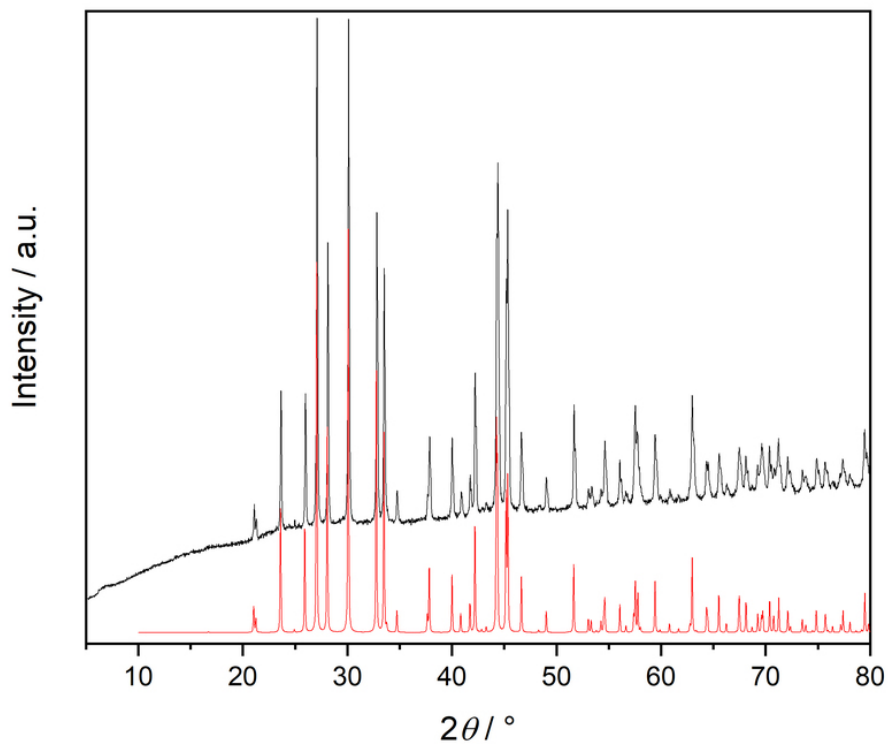

Figure S72: X-ray powder diffraction pattern of the pyrolysis residue of  $\text{Sr}(\text{NH}_2\text{SO}_3)_2 \cdot \text{H}_2\text{O}$  after TGA shown in black compared with a calculated pattern of synthetic celestine  $\text{SrSO}_4$  based on single-crystal data[7] shown in red.

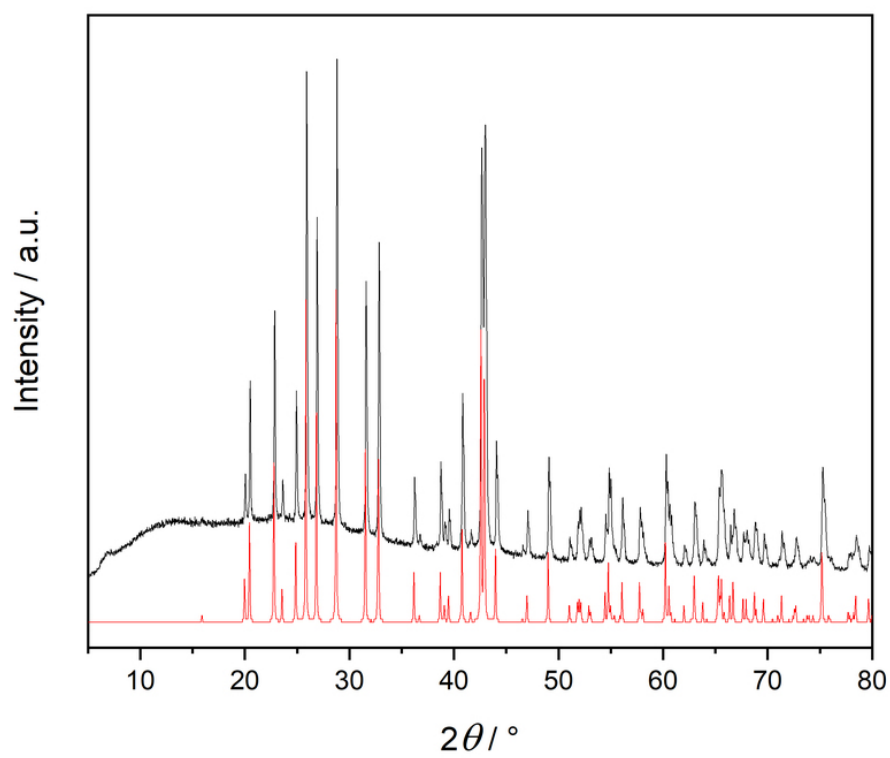

Figure S73: X-ray powder diffraction pattern of the pyrolysis residue of  $\text{Ba}(\text{NH}_2\text{SO}_3)_2$  after TGA shown in black compared with a calculated pattern of synthetic barite  $\text{BaSO}_4$  based on single-crystal data[8] shown in red.



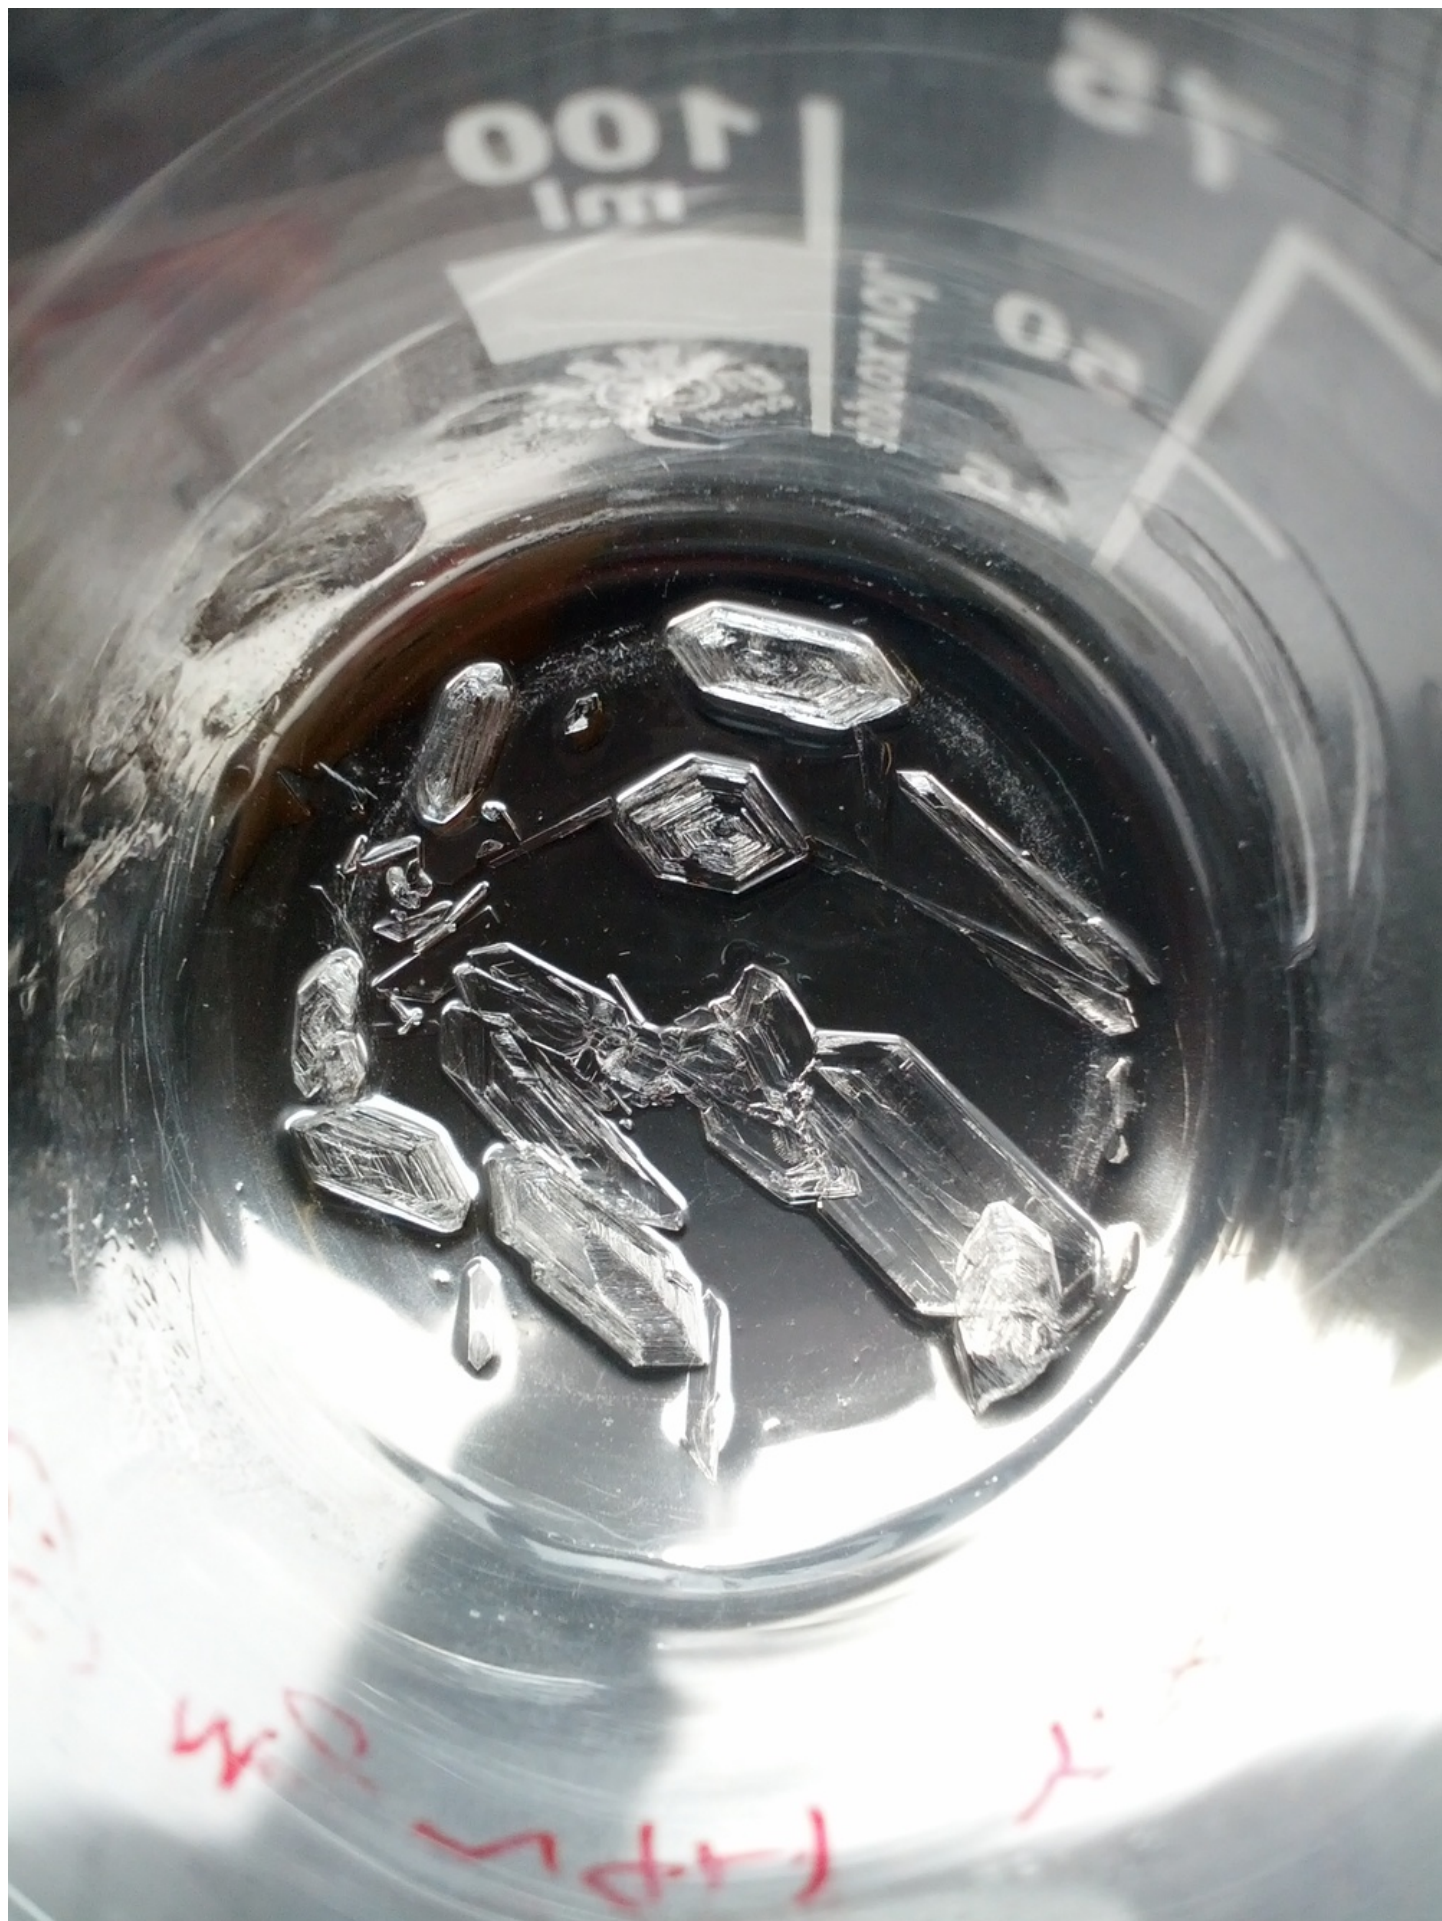

Figure S74: Photograph of  $\text{Sr}(\text{NH}_2\text{SO}_3)_2 \cdot 4\text{H}_2\text{O}$  as synthesised inside a 100 ml beaker (50 mm in diameter).



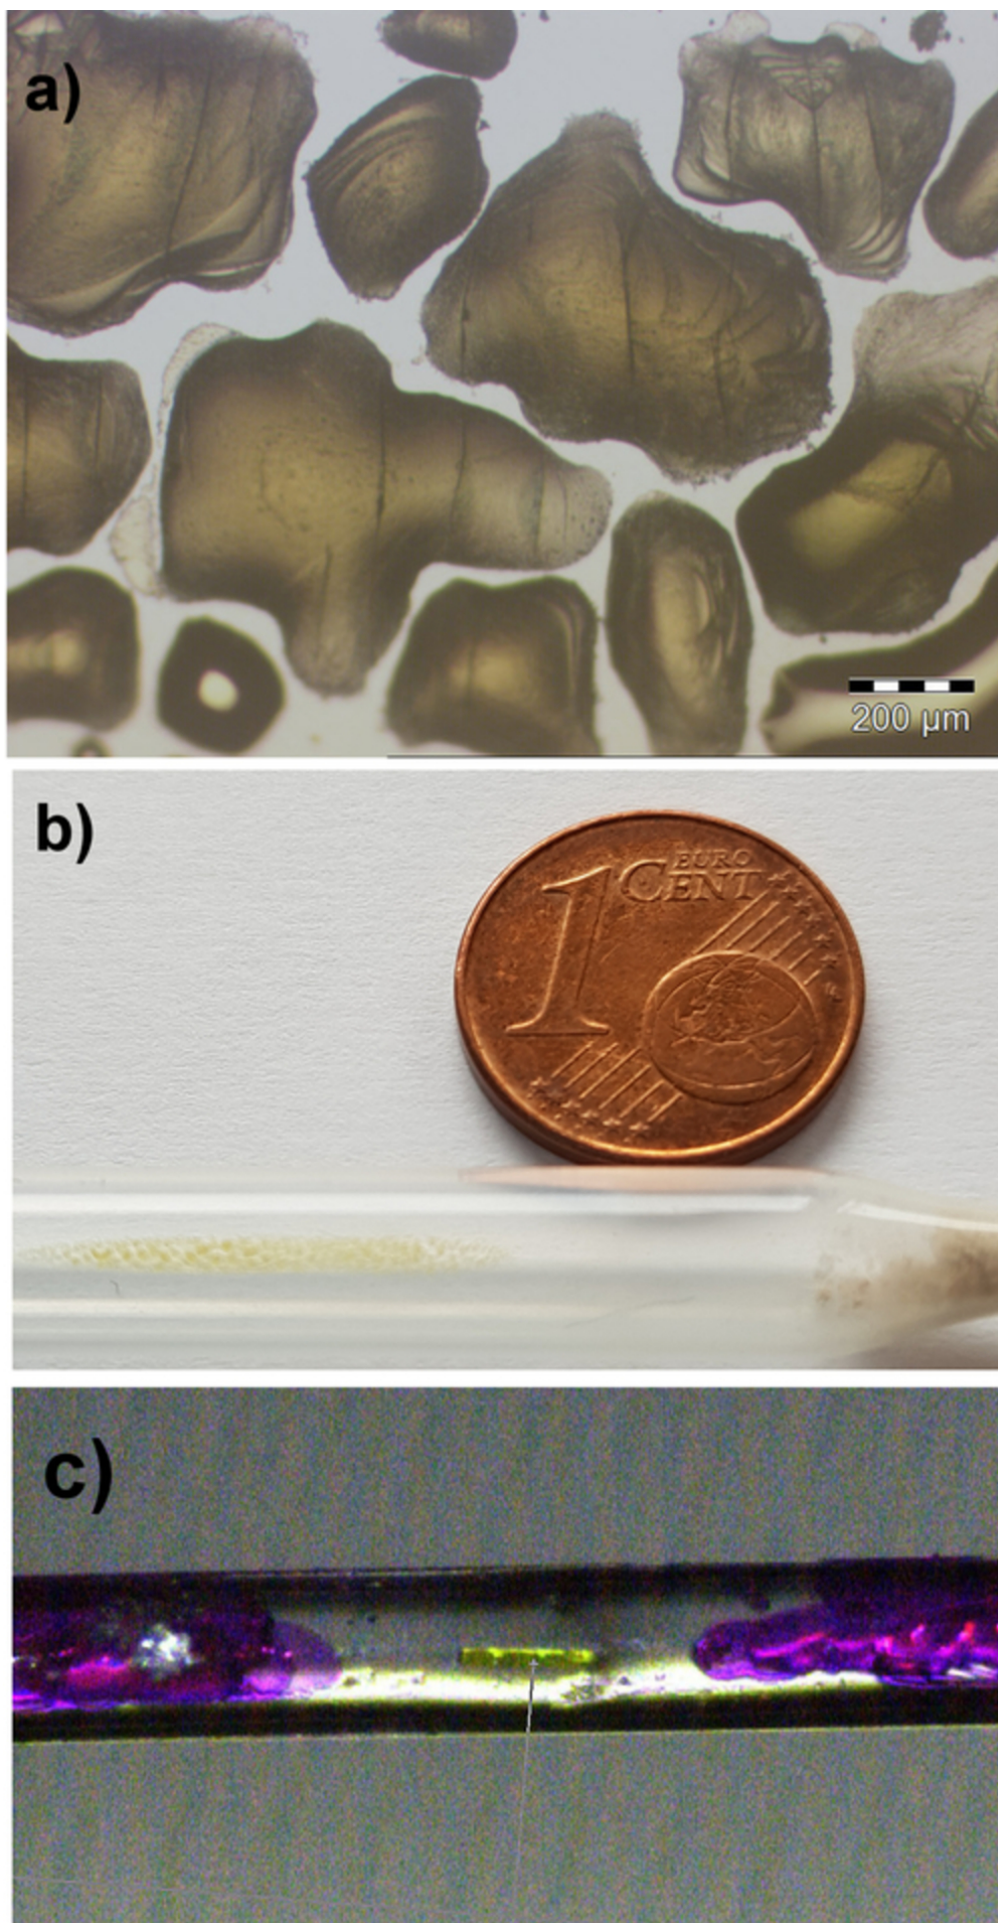

Figure S75: a) Light microscopy image of  $S_4N_4$  crystallised on the wall of an ampoule. b) Photograph of the ampoule with yellow  $S_4N_4$  crystallised on the wall of an ampoule over  $SrSO_4$  on the bottom. c) Specimen selected for single-crystal XRD study in Lindemann-glass capillary (0.3 mm diameter).

## References

- [1] T. Balić-Žunić and E. Makovicky. Determination of the centroid or 'the best centre' of a coordination polyhedron. *Acta Crystallogr., Sect. B: Struct. Sci.*, 52:78 – 81, 1996.
- [2] E. Makovicky and Balić-Žunić. New measure of distortion for coordination polyhedra. *Acta Crystallogr., Sect. B: Struct. Sci.*, 54:766–773, 1998.
- [3] M. Weil. The high-temperature modification of magnesium sulfate ( $\beta$ -mgso<sub>4</sub>) from single-crystal data. *Acta Crystallogr., Sect. E: Crystallogr. Commun.*, 63:i172, 2007.
- [4] P. J. Rentzeperis and C. T. Soldatos. The crystal structure of the anhydrous magnesium sulphate. *Acta Crystallogr.*, 11:686–688, 1958.
- [5] D. Speer and E. Salje. Phase transitions in langbeinites i: Crystal chemistry and structures of k-double sulfates of the langbeinite type  $m_2^{++}k_2(\text{so}_4)_3$ ,  $m = \text{mg, ni, co, zn, ca}$ . *Phys. Chem. Minerals*, 13:17–24, 1986.
- [6] H. Morikawa, I. Minato, T. Tomita, and S. Iwai. Anhydrite: a refinement. *Acta Crystallogr., Sect. B: Struct. Crystallogr. Cryst. Chem.*, 31(8):2164–2165, 1975.
- [7] S.D. Jacobsen, J.R. Smyth, R.J. Swope, and R.T. Downs. Rigid-body character of the so<sub>4</sub> groups in celestine, anglesite and barite. *Can. Mineral.*, pages 1053–1060, 1998.
- [8] R. J. Hill. A further refinement of the barite structure. *Can. Miner.*, 15:522–526, 1977.
